# Supplementary material for: Virus Elimination from Naturally Infected Field Cultivars of Potato (Solanum tuberosum) by Transgenic RNA Interference
Source: MDPI journal article supplement (doi:10.3390/ijms23148020), 2022-07-20
Supplement: s1 [file s1]

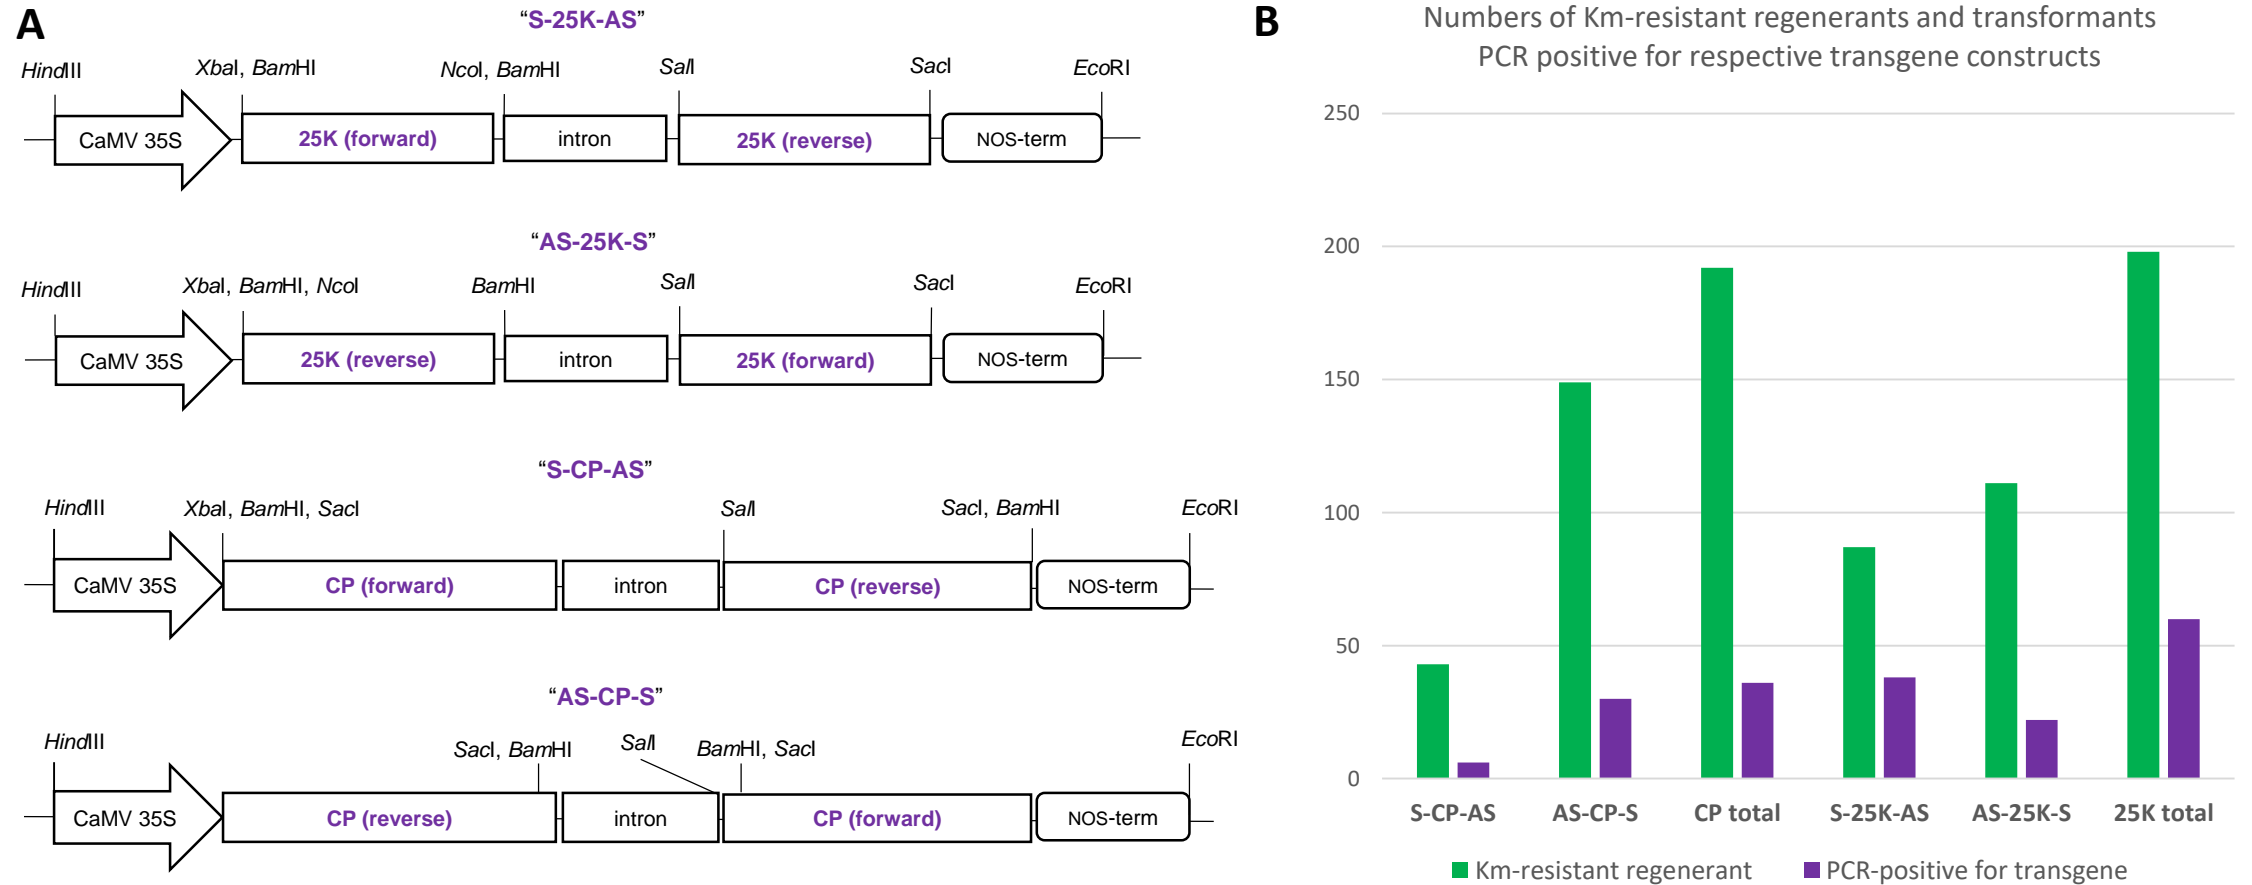

**Figure S1.** Potato transformation with intron-hairpin RNA constructs. **(A)** Schemes of the intron-hairpin RNA expression cassettes S-CP-AS, AS-CP-S, S-25K-AS and AS-25K-S cloned in the binary vector pCambia2300. **(B)** Potato transformation with the intron-hairpin RNA constructs. Numbers of Km-resistant regenerants and PCR-positive transformant lines were calculated independently for each construct and for two CP constructs together (CP total) and two 25K constructs together (25K total).
