# Supplementary material for: Virus Elimination from Naturally Infected Field Cultivars of Potato (Solanum tuberosum) by Transgenic RNA Interference
Source: MDPI journal article supplement (doi:10.3390/ijms23148020), 2022-07-20
Supplement: s1 [file s1]

**Table S1.** Efficiency of carlavirus elimination from PCR-positive transformant lines of naturally-infected potato cultivars

| Cultivar<br>(virus infection before transformation) | Line # | Construct used for transformation | Virus detection by ELISA    |     |     |                                       |     |     |                                        |     |     |
|-----------------------------------------------------|--------|-----------------------------------|-----------------------------|-----|-----|---------------------------------------|-----|-----|----------------------------------------|-----|-----|
|                                                     |        |                                   | Before planting in the soil |     |     | Two months after planting in the soil |     |     | Four months after planting in the soil |     |     |
|                                                     |        |                                   | PVS                         | PVM | PVY | PVS                                   | PVM | PVY | PVS                                    | PVM | PVY |
| Albinka<br>(PVM + PVY)                              | parent | -                                 | -                           | +   | +   | -                                     | +   | +   | -                                      | +   | +   |
|                                                     | 39     | S-25K-AS                          | -                           | +   | +   | -                                     | -   | +   | -                                      | -   | +   |
|                                                     | 43     | S-25K-AS                          | -                           | -   | +   | -                                     | -   | +   | -                                      | -   | +   |
|                                                     | 46     | S-25K-AS                          | -                           | -   | +   | -                                     | -   | +   | -                                      | -   | +   |
|                                                     | 47     | S-25K-AS                          | -                           | -   | +   | -                                     | -   | +   | -                                      | -   | +   |
|                                                     | 48     | S-25K-AS                          | -                           | -   | +   | -                                     | -   | +   | -                                      | -   | +   |
|                                                     | 74     | S-25K-AS                          | -                           | +   | +   | -                                     | -   | +   | -                                      | -   | +   |
|                                                     | 159    | S-25K-AS                          | -                           | -   | +   | -                                     | -   | +   | -                                      | -   | +   |
| Dunyasha<br>(PVM)                                   | 218    | S-25K-AS                          | -                           | +   | +   | -                                     | +   | +   | -                                      | +   | +   |
|                                                     | parent | -                                 | -                           | +   | -   | -                                     | +   | -   | -                                      | +   | -   |
|                                                     | 44     | S-25K-AS                          | -                           | -   | -   | -                                     | -   | -   | -                                      | -   | -   |
|                                                     | 61     | S-25K-AS                          | -                           | +   | -   | -                                     | -   | -   | -                                      | -   | -   |
|                                                     | 62     | S-25K-AS                          | -                           | +   | -   | -                                     | +   | -   | -                                      | +   | -   |
|                                                     | 65     | S-25K-AS                          | -                           | +   | -   | -                                     | +   | -   | -                                      | +   | -   |
|                                                     | 67     | S-25K-AS                          | -                           | +   | -   | -                                     | -   | -   | -                                      | -   | -   |
|                                                     | 146    | AS-CP-S                           | -                           | -   | -   | -                                     | +   | -   | -                                      | -   | -   |
|                                                     | 162    | AS-CP-S                           | -                           | +   | -   | -                                     | -   | -   | -                                      | +   | -   |
|                                                     | 293    | AS-CP-S                           | -                           | +   | -   | -                                     | +   | -   | -                                      | +   | -   |
|                                                     | 294    | AS-CP-S                           | -                           | +   | -   | -                                     | +   | -   | -                                      | +   | -   |
| Fortuna<br>(PVS + PVM)                              | 312    | AS-25K-S                          | -                           | +   | -   | -                                     | +   | -   | -                                      | +   | -   |
|                                                     | 374    | AS-25K-S                          | -                           | +   | -   | -                                     | +   | -   | -                                      | +   | -   |
|                                                     | parent | -                                 | +                           | +   | -   | +                                     | +   | -   | +                                      | +   | -   |
|                                                     | 309    | AS-CP-S                           | +                           | +   | -   | +                                     | +   | -   | +                                      | +   | -   |
| Kormilitsa<br>(PVS)                                 | 360    | AS-CP-S                           | -                           | +   | -   | -                                     | +   | -   | -                                      | +   | -   |
|                                                     | 361    | AS-CP-S                           | +                           | +   | -   | +                                     | +   | -   | +                                      | +   | -   |
| Orbita<br>(PVM)                                     | parent | -                                 | +                           | -   | -   | +                                     | -   | -   | +                                      | -   | -   |
|                                                     | 103    | S-25K-AS                          | +                           | -   | -   | -                                     | -   | -   | -                                      | -   | -   |
| Picasso<br>(PVM + PVY)                              | parent | -                                 | -                           | +   | +   | -                                     | +   | +   | -                                      | +   | +   |
|                                                     | 148    | AS-CP-S                           | -                           | +   | -   | -                                     | +   | -   | -                                      | +   | -   |
|                                                     | parent | -                                 | -                           | +   | +   | -                                     | +   | +   | -                                      | +   | +   |
|                                                     | 161    | AS-CP-S                           | -                           | +   | -   | -                                     | -   | -   | -                                      | +   | -   |
|                                                     | 172    | AS-CP-S                           | -                           | -   | +   | -                                     | -   | +   | -                                      | +   | +   |
|                                                     | 192    | AS-CP-S                           | -                           | -   | +   | -                                     | +   | +   | -                                      | -   | +   |
|                                                     | 194    | AS-25K-S                          | -                           | -   | +   | -                                     | -   | +   | -                                      | -   | +   |
|                                                     | 257    | AS-CP-S                           | -                           | +   | -   | -                                     | +   | -   | -                                      | +   | -   |
|                                                     | 351    | AS-25K-S                          | -                           | +   | +   | -                                     | +   | +   | -                                      | +   | +   |
| Sante<br>(PVM + PVY)                                | 352    | AS-25K-S                          | -                           | -   | +   | -                                     | +   | +   | -                                      | +   | +   |
|                                                     | 381    | AS-25K-S                          | -                           | +   | +   | -                                     | +   | +   | -                                      | +   | +   |
|                                                     | 383    | AS-25K-S                          | -                           | +   | -   | -                                     | -   | -   | -                                      | -   | -   |
|                                                     | parent | -                                 | -                           | +   | -   | -                                     | +   | -   | -                                      | +   | -   |
| Tokhtar<br>(PVM)                                    | 291    | AS-CP-S                           | -                           | -   | -   | -                                     | -   | -   | -                                      | -   | -   |
|                                                     | 295    | AS-CP-S                           | -                           | +   | -   | -                                     | +   | -   | -                                      | +   | -   |
|                                                     | 339    | AS-CP-S                           | -                           | -   | -   | -                                     | +   | -   | -                                      | +   | -   |
|                                                     | parent | -                                 | -                           | +   | -   | -                                     | +   | -   | -                                      | +   | -   |
|                                                     | 69     | S-CP-AS                           | -                           | +   | -   | -                                     | +   | -   | -                                      | +   | -   |
|                                                     | 82     | S-CP-AS                           | -                           | +   | -   | -                                     | +   | -   | -                                      | +   | -   |
|                                                     | 110    | AS-CP-S                           | -                           | +   | -   | -                                     | +   | -   | -                                      | +   | -   |
|                                                     | 160    | AS-CP-S                           | -                           | +   | -   | -                                     | +   | -   | -                                      | +   | -   |
|                                                     | 179    | AS-CP-S                           | -                           | +   | -   | -                                     | +   | -   | -                                      | +   | -   |
| Zeren<br>(PVS + PVM + PVY)                          | 314    | AS-CP-S                           | -                           | +   | -   | -                                     | +   | -   | *                                      | *   | *   |
|                                                     | 315    | AS-CP-S                           | -                           | +   | -   | -                                     | +   | -   | -                                      | +   | -   |
|                                                     | 316    | AS-CP-S                           | -                           | +   | -   | -                                     | +   | -   | *                                      | *   | *   |
|                                                     | 398    | AS-CP-S                           | -                           | +   | -   | -                                     | +   | -   | *                                      | *   | *   |
|                                                     | parent | -                                 | +                           | +   | +   | +                                     | +   | +   | +                                      | +   | +   |
|                                                     | 38     | S-25K-AS                          | +                           | +   | +   | +                                     | -   | -   | +                                      | -   | -   |
|                                                     | 59     | S-25K-AS                          | +                           | +   | +   | +                                     | +   | +   | +                                      | +   | +   |
|                                                     | 119    | S-25K-AS                          | -                           | +   | -   | -                                     | -   | -   | -                                      | -   | -   |
|                                                     | 344    | AS-25K-S                          | +                           | +   | -   | +                                     | +   | -   | +                                      | +   | -   |
|                                                     | 336    | AS-25K-S                          | -                           | -   | -   | -                                     | -   | -   | -                                      | -   | -   |

\* not detected, because plant died, or not enough tissue to sample

- virus negative

+ virus positive
