# Supplementary material for: Virus Elimination from Naturally Infected Field Cultivars of Potato (Solanum tuberosum) by Transgenic RNA Interference
Source: MDPI journal article supplement (doi:10.3390/ijms23148020), 2022-07-20
Supplement: s1 [file s1]

**Dataset S1.** Supplementary sequence information.

(A) Primers for cloning of PVS ORFs and probes for sRNA blot hybridization analysis  
(B) Consensus sequences of *de novo* reconstructed viral genomes from the field potato samples ALYU-75 (cv. Zeren, non-transformed), ALYU-76 (cv. Zeren, transgenic line #119) and ALYU-79 (cv. Kormilitsa, transgenic line #103) and the reference sequence of the S-25K-AS RNAi transgene expression cassette (CaMV 35S promoter-PVS 25K ORF sense-*Ricinus communis* catalase gene *cat1* intron I-PVS 25K ORF antisense-NOS terminator)  
(C) Multiple alignments of PVS and PVM 25K and CP coding sequences

**Dataset S1A.** Primers for cloning of PVS ORFs and probes for sRNA blot hybridization analysis.

**Primers:**

|       |                                        |       |
|-------|----------------------------------------|-------|
| #302  | 5'-cgtatctagaatgccgcccaaacccggatcc-3'  | XbaI  |
| #304  | 5'-cgtaagatcttcattggtgatcgattacgggt-3' | BglII |
| #303  | 5'-cgtaccgggatgccgcccaaacccggatcc-3'   | SmaI  |
| #305  | 5'-cgtagtcgactcattggtgatcgattacgggt-3' | SalI  |
| #306  | 5'-cgtaggatccttagcgcggtgtaagtgg-3'     | NcoI  |
| #308  | 5'-cgtaggatccatgaggatatttgatagctt-3'   | BamHI |
| #307  | 5'-cgtagagctcatgaggatatttgatagctt-3'   | SacI  |
| #309  | 5'-cgtagtcgacttagcgcggtgtaagtgg-3'     | SalI  |
| intAS | 5'-agtcgctatgtaatatatttgccccaataacc-3' |       |

**Probes:**

|           |                              |
|-----------|------------------------------|
| PVS_25K_s | 5'-atatatggatgtgtttttgcaa-3' |
| miR160_as | 5'-tgccatacaggagccaggca-3'   |

**Dataset S1B.** Consensus sequences of *de novo* reconstructed viral genomes from the field potato samples ALYU-75 (cv. Zeren, non-transformed), ALYU-76 (cv. Zeren, transgenic line #119) and ALYU-79 (cv. Kormilitsa, transgenic line #103) and the reference sequence of the S-25K-AS RNAi transgene expression cassette (CaMV 35S promoter-PVS 25K ORF sense-*Ricinus communis* catalase gene *cat1* intron I-PVS 25K ORF antisense-NOS terminator)

>PVS\_ALYU-75\_ON583978  
TAAACACTCCGAAAAATATTGACTTAAACAAACGCGACAGTTCAAGCAAATTACTTAACATGGCACTTACTTACAGAAGTCCAATCGAGGAAGTGTTAACTACTAGAGCCTAATGCT  
CAGTCCCTtaTTTCTAACGTCGCCACCAGCAGCTTTCAAGAGAGTGAGAAGGATAAATTCGCCTGGTTTTGCTACCATGTGTCGGCTAGCGCCAAGGAACACCTTAGTAGAGCAGGAAT  
TACCTAAGCCCTTACTCGGGTATCCCTATCTCACCCGGTGTGCAAGACATTTGGAATAATACCTACTGTACAAAGTCTTACCACCACTTGTAAATAACACCTTTTACTTTGTAGGAATA  
AAAGAATTCAGGCTCAATTTCTTAAGAAGAGAAATCAACAAATGAGCATGATTCAAGCTATAAATAGGTATGTGAGCAGTGCCGATAAATTGCATATGGTAATGAGTTCGTGATCAAA  
TTCGGCGCGGCTCGCCCAAGCTCAAGCGGCACCATGGTTATCTCACTGGATCCAGCTTCGGTGATCTCTTGCCGAACATAAAGAGGGATTTCAATCTCTCTTCCACGATGAGATGCAT  
TATTGGGAAGAACAACAGTATGATCAACTCTTTGGAACAATGCAGACCAATACATCTGTTGCACAATTTGTGTACCCAACAGAGATATTCGTTGGGCGCCGACCTCTTTGAATCCGCTGG  
GCATATGAGTTTGAGATCAAGAGAGATAAATGCTCTTTTACCAGATGGGGTGCAGTAGTGAAGGCTATGAGCAGCCTGTCAACTGTGGGTATCTCCTCCGCACTAGAAAGATATTGCTG  
AGGGATGGCACTATGTACAGTGTGATCTAGTGTGCAGCAAAATTCGCCCATCTTAATAGCAATACCAAGGGCGATTGTATCACCCCGACTTACCGTAGCTTCGGCCCTTTTGAGGGG  
ATCAAGAGTGCAGGGCTGCAGGGGATAAGCAAAAGTGGCCGAAATTTCTATCCCTGTGAGCGACATGATTCTCGTTTATACAGGTACTTACGGCTCTTAAAGAAACCTGATTAAGCAG  
TCTGCAATGGCAAAATTTCTGCGCAGATGCGCCTGAGCCGAGTGGTGACATGATAAGATTTATGAGGAACCTGAGTGATCTGATAATCAACACTGGCACTTTGAGGGTATGATCGACGA  
GAAGTGTGCAAAATTTCTTTGGTAATCTGGGCTTGGCCTTACCGGCCACTCTCGCGTCAAGAGTAAAGAGTACTCGTGCTGTAAGTTTGAAGGCTTTTATAGGCTCGCTTGAGCCGCTC  
GTCGTTGATTCGAAATTCGAGACCATCTCGTGGGCGTACCCTGCGCGCAGCTGTTGTCAGTGAATCACTGATGATCCCCCTGAGGATATGATGAAGCAATGGATAGGAAGTGGGAG  
AGTAGTAGCAGATGTTTGGCGACAGGGTCCCGCACCTTACCGTGGGGATATGTGGAGCGAACATCCCGCTCAATGAGCTTTTGAGCATAGATTCTTACGCGGATCAAGTTTCTTGAGA  
GGGCTGATGGAATTTGACGTGGAAGCATGTGCACAGAAGGCCCTTGCAACCACCGCTGACTTTTGAGTCTTACGTGGCCAGATCGCGTCTGTTGCTGCTCTCTCGGCTCGCATTTGATC  
AGTGTCTTAACGTGTTGCCAGTATGCTGAGGTAGGCCAAATAGTGAGCAACACACGTTTGATGTGATGCTCTTCTGTTGCTGGGGACCTCCGTTGGTTCGCGGCCACCGACATTTCAGG  
CGTAACTTAAGTTCTTTGAGCAGAGCGGCCGATTGGGCAAGGTACAAAAGTGAGTTTCGAGTGCACAACATATGCAAAAGCCCAAGGAACAGGTATATAGGTTTATCTCCAAAACGTTTGTG  
TACAGCTTTTGGCGGGTGGGGGACGATGGTCTTTGACCCCGGCTACTGTTGCGAAAGTGATTTCTGAGGCCACCCACTCTGACTACAGCGTAGTTGATCAACCCAGCAGCAGCACAATA  
AATTCAGAAAAGAACTTTGATCCCAAGGGACAGGTTGGGGAGAGCGTTGGGCTGCGCATGTGGGCTGCGAGTCTGCAACAAGGGGTGTAGCGTTCCCCACGGAACACCGGATTCATTTGGAG  
AAGGGGGTTTCAGGCAAGCGTGTGATGCTGCTGAGGGTTCAGGTCGATTATACATCCGAGCTTTTGGCCATAAGAACTTGGGCTGGCCTAGATGGTTAAGCAAGTGGATGGAATTCG  
CATGAGATAGTAGAGCTACTATAATAGCATGCTGGCCAGGAATTCCTGCTGGCGAGCTCTAGAGTGTAGAGTGGGTGATGGAGGCCAGTTTATCCCGGCTCAATGTGGCCATA  
GCTGAAGTTGAGAGTCAGTCCACGGTTTCAATTTGGCTGTGTGGCAGGAACCTGGGCACTGTTGCTGGAATTTGGGGATTTCAATTGAAGTGCCCTGGTCCATGTTGGAGCAAGCACCATTCTC  
CACgTGCCTGcAGCAAAATGagCGGGGTGACGCTTTATCTTCAGGCAAAATTAAGTTTCCAGAGCGGTGAGGAATGCCGAGTGGGGCAAGTCGAACGCCCTGCTTCAACAGCAGGTGGC  
GGAGGTTCCAAGCTCAATGAGCATGATGTGCCACCAACAGAGGGGGTCCGAGTCCGATCGCGTCCGAGGATGCCAGCAGCAAGAAATTCGATAGGGGTACCTTAATGAGGTGGTGGGA  
GATGTTTTTGGCTGGCCATCTCCGACTTCACAGGGGTGAGCGTGCAGATATGAACAGGGATTCGAACAGCTGGATTGGGAGAGTGATGCATTGACAGCCGAGTTAGCCTTGCAATTTG  
AAACCAACAGCTTTGGGCTGAAGAGGAGGCCATTATCGCGACAAGTAAGCAATACCGGTACAGGATCTGGTGCTGAGTGCCGATAAGGAAGCAACAGTCATTATAGCCCCGAAGGCGAG  
CGGCTGCGATCCATGGTTTATACACCATCCGCGGCCCACTTTGAGGCGAGTTTGGCCCGGAACGATTGCGTGCTTTGGCTGTTGCGTCTGCTCTGCGGAGCAGGATGAAGAGGTGCTTT  
TCAATTTAGGTGCGCAGTTGGGTAAATGAGTTTCTTCAGGATGTAATAAAGGGTGAAGGAATTTATCGGGAACAGTTGGCCATGGTTTTCAAACTTTTGACATCTGCGCGAGTGTGCAC  
CGGAGGGTGAGGTTTTCTGATAACTCTGAAGTAGATTGCACGGCACATTCAATCTGAGCAAGGATCATATTGAGCATTGTAAGAGTAACCCGATGGGAATAACCAAAATTCACAAGT  
GTGCATGATGCTAGCTGTGAGATTGAAGCAGGAACACTCTCCATGCTTAAAGCCATGTGCAGCTTGCTACCGTACAACCCATGTGAGCTTAGAGCAAAAGTCTCTGCTGATGTTTCAAT  
CGAGGCGACTGAGGTGCTCTGCGACAGTGTGTTCAATAAGGTCCGGAATTTACTCGAGGCAAAATGAGGGGCGCTGCGGGAGAATGTAGAGAGGTGGGTGCTGCTTGTGAAGTCTTC  
GGAGTGGGAAGGATGTTCTTTAGGAAGTGTTAAGTAGCAATCATGGGAAGGACATTATCTACGTGTCTCCAAGAAAGCATTGTGGCAGATTCAATCAATGAGCTTGTGAAGTCTATC  
TGACAGCAAGAGGGGGCGCAAGTGTGCAAGGATTCCGCACTTCACGTTTCGAGAGAGCGCTCTCTGAAGTGCAGCAATTTAGGCCAGATGCAACGATCATCATTGATGAATTCAGCTG  
TTCCACCAGGTTACTTGATCTATTCTCTATGTTGGTACCAGCGGGGTGCACATGTTCTTGGTGGGCGATCCGTGCCAAGCGACTATGACTCAGAAAAGACCGGAGCTTGTTCAA  
GCCATGAATCCGACATCAATCTCCTGTTGGATGATGCGGATTTATGATTTAATTCGAGGATCGTAGATTTAAGGACAGGCTTTTGTATGGCCGTTTGCCATGCTCAATGGGGCCCAT  
TACGGGAGGCCATCCAAGTTCACAACTATTGAGGGCATTGAAATTTGAAGCCATTCTCAGTCAGCGCAGGTTTGTAGTATCTCTGTTGATGAAAGAGATAGTGACGACTTAC  
TTCCCGAGCTCTTGCCATGCTTTACTTTTGGAATCAACCGGGATGACATAACAAGTCTGAGTGTGATCTGATCAGACACCTCAAAATACACAGTGCAGAGGAGTGGTTAACTGCC  
CTGAGCCGCTTCTCACATTTCAATCGCTTCGTAATGCAACCGGTGGAACATCCAGTTGGTGACAGGTTATACCAAAATAGGGTTCTAGTGCATTTCTGCTAAAACCTGCAAGATC  
GATGACCTTAAGATGTTGTTTACCTGGTAGGCCACGCTTTAAGGAAGGATTTGGGGGTGAAGAAATTTGGCGAGATGAGGGCAAGAGAGATTCAGTTGGAGGGTGATCCGTGGTTGAA  
ACTATGCTGGATCTACTACAGAAAGAGGATCAGGAGGAGGTTGAGGAAGCGCTGTAGAGCTTTGGTAGGAATGGTTTCGCACACATTTGCCGCAATGGAGGCTGGAGGGCTCAGAGA  
AGGTGGGTTGAAGGATATTGGCAAAAGAGTCCGTGAGAAGCGGATGGGGCTATTTGGTCTCTGAGCAATTCACAGATGAGCATTCAAGGCAGTTGGGGAGGCAAAATCAACAAAGCGCCG  
GAGAGGTTTGAACACTATCTACCCACGACATAGAGCTGCGGACAGCTCACTTTTCATCATGCTGCTGAGGAAAGATTTAGGTTTTCGAGACCAATAGAGAGGATTCGAAGCTCCGGGTT  
CGGAGATGATGAGGCTTCTTACTGAAAGAAATTTCTCAAGCATGTGCCACTGGAACCAATGAGCATGACACAAGATATGGCTGAGGCAAGATTTGATTTGAGGAGAAAGAGCAGCGAG  
AAGAGCGCAGCCCAATGAGAACCAACAGCACAGATCTGTAGAGATGGCTGGCCAGTGGGATGGGCTTCTTCAAAGTCTCAACTCTGCACAAAGTTTGACATCGGTTGACGGAG  
GCCAAAGCAGGCCAAACCATTTGCTGTTTCCAACATAGCGTCTTATGCCGCTTTGCCCGTATACATGAGGTACATTGAAAGAAACTCAATGAAGTGTACCAGGCAAGGTTTACATTCAT  
TCAGGCAAAAGGCTTGAAGAGCTAAATAAATGGGTCATAGAGTCCAAATTCGATGGGTTGTGCACAGAGTCTGACTATGAAGCCTTCGACGCTAGTCAAGACCGATACATAGTGGCGTTT  
GAGCTAGCATTTGAGGATTTTGGGCTTGGCCATGATCTCATAGAGGATTCAGATGACTCAAAAGTCAAGTCAAGTGGGCTCAAGTTGGGGAATTTGCCATAATGCGCTTCTCCGGTAG  
GCTAGCACCTTCTGTTTCAACACAATGGCCACATGCTTTTCACTTCTTGAGATACAAGTGAAGGGGATGAGCGGATATGCTTCGCTGGTGACGACATGTGCGCCAAACAGGCCCCCTA  
TTCATTAAGATATCTCATGAGGCTTTCTTAAGAAGCTTAAGTTGAAGGCAAAAGGTTGATAGGACAAACCCAGGAGTTTCTGCGGGTGGAGCTTTGTCTCGGATGGGATTTACAAAA  
CCGCGACTGGTCTTTGAGGCTTTGATCGCCAAAGGAAACGGCCAACTTGCCCAATTCGATGACAAATTTAGCAATTTAGCAATTTGAGTATCTTATGCTTCAAGCTCGGGAGAGGATTAAGGAG  
CGCATGTCGGAGGAGGAATTTGATGAGCTTCTTACAATTTGTGTGAGAGTTATTAATAGCATAGAGTATGCTGAGTCTGAGATCCGCTGTGTGATGAGGATTTGTATGAGCTTAGGTAA  
TCAGCTTAGTAGTATTGAATATATGGATGTGTTTTTGAATAATTTTGAATAAATATAGTTTGAAGCGTGTAGTAGTACTTTAAATAAACCAATAGTTGTTTCAATAGTGTCCAGGAGCTGG  
TAAAGATTCTGCAATTCGGGAGTTGCTTAAGTTAGATAGTAGGTTTGATGCAATACCCGTCGGCCGCGACAGATCCCCGAATCTAGAGGGGGCTTCATCAAGGCTGAGCGTGGTGGGGA  
GAATAAATTTGCTGCTGGTGATGATGATAGAGAGGGCGGTCGAGAGGACGCTTTGCAATTTTGTGCTACCATCTCAGAGTACCGCTGTGAGCGCTGAGCGGACACTTCATCAAA  
AACATTTAGGACCATCGCTTTGGCAAGTGTACCGCTTCACTTTTGAAGATTTGGGTTGGGAGCTCAGGCAAGGATCAAGATTCAGTTCAAAATTCGGGATATCTTCAACAGTTGACCTGAG  
GGATACTACTCGTGACTTCGAGCGCAAGTTGGAGAGTTGCTGAGGAGCCAGCGGCTCAGGCGAGCTGCAATTTGGTAGGTTGCGCGGGGCTACTTTTGCACACACTAACCTTCTGCACTTC

>PVY ALYU-75 ON583979



RNAi V5\_25K\_cassette13.8  
AAGCTTTGGCGTCCGTGACCGTCAACATCGTGTGGAGCAGCAGACATCTGTTACTCCAAAAATATCAAAGATACAGTCTCAGAAGACCAAAGGGCAATTGAGACTTTTCAACAAAGGGTAAT  
ATCGCCGAAACCTCTCTCGGATTGCTTCCGACCATCTCTGTCACTTATTGTGAGAGATGTGAAAAAGGAAGTGGCTCTCAAAATGCCATCTTCAGTATGAAGGAAAGGCCATGATG  
AGATGCCCTCTCGGCAGAGTGGCTCCCAAGATGGACCCACCCAGGAGACCTCGTGGAAGAAAGAGACGTTCCCAACCAAGCTTTCAAAGCAAGCTGGATTGATGTGATAACATCTGTGTGA  
GCAGCAGACACTTGTCTACTCCAAAATATCAAGATGACAGTCTCAGAAGACCAAAGGCCAATTGAGACTTTTCAACAAAGGGTAATATTCGGAAACCTCTCGGATTCCATTTGCCACAGC  
TATCTGTCTCATCTTATTGTGAAGATAGTGTGAAAGGAAGAGTGGCTCTCAAAATGCCATCTTGGCATTGAAGAAAGGACCTCATGTTGAAGTGGCTCTCGCCAGACAGTGTGTCGCGAAGATGG  
ACCCCCACACAGCAGGAGCATCTGGTAAAGAAAGAGACGTTCAACCAACAGCTTTCAAAGCAAGCTGGATTGATGTATCTCCATCAGCTAGGAAGATAGCGCACAATCCCAATCTCCTTC  
CGAAGACACCTTCTCCTATATAGGAAGTCTCATTTCTATTCTGGAGAGACCTCGCATCTAGAGATGACTCATGAGGATATTTGATAGTCTAGGTAATAGCTCTAGTATGTAATATATGAGT  
GTGTTTGTTCGAAATTTGTAATAAATAATAAATTTAGCGGTGTGTAGTAGTACTTTAAATAAACCAATAGTTGTGTCTATAGCGTCCGGGAGCTGTAAAGTCTGCAATCCGGGAGGTGTCT  
AAGTTAGATATAGTAGTTTGTAGTCAATATACCCGTGTGTCGCGCAGACATCCCGAATCTAGAGGGCCGCTTCTTAAGGCTACGACAGCTGGGGAGATAAATATGCTGCTGTTGTATGATGATC  
GTAGAAGGCGCGCTCCAGAGAGACGCTTTGCATCTTTCAGATACCATCTCAGAGACCGCTCTGAGCCGCTACCGAGCCACTTCTCAAAACATTTGAGCCATCTGTTTCGCGCAAGTGT  
ACCGTCTCTCTCTTTTGGAGATTTGGGTTGGGACGTACAGGCAGAAAGTCAAGACTCAGTCTCAAATTTGCAGATATCTTACAGTTGACCTTAGGGATACTATTGTGTACTTCGAGCCAGAA  
TGTGGAGAGTTACTGAGGACGACCGAGTCTAGGCGAGGACTGATTGTGTGAGTTCGCGGGGCTACTTTGAACACGTGACCTCTGTCATCTGGAAGACGCGCCACTGGTGTGATAAGCT  
GCTGCTTTCTAATGCTTCAAGGACGACATAGAGGCTGTCTCATTTGTGCTCTGTGACCATCTACACCGCGCTCAACATGATGCTCCACAGGGTAAATTTCTAGTTTCTTCTCTCTCA  
TTCTTCTGTAGGACCGCTTCTCTCTTTATTATTATTGAGTCTGTATCTCTTTTAAATAGCTGATTTTAAATGATGTGTTTAGGCGCAATATTAACATAGCTTTAACTGATTAATC  
TGATTCTCTTTATTCGTGTGCTCATGTATGATGATGATGTGTACAGAACCGTCGACATAGGCGGCGCTGAATGGCATCAGGCCAATAATGACCAAGCTCTTAGTGTGCTCTGTATGAGC

TTGAAAAGCAGCAGCCTTATCAACCAAGTGGGCGGTTCTCAGAAGTGACGAAGGTCACGTGTTTCAAAAGTAGCCCCGCGCACCTACCAATGCAGCTCGCCTCGACTCCGTGGCTCCTCAG  
TAACTCTCCAACCTCTGGCTCGAAGTACACAATAGTATCCCTAGGGTCAACTGTGAAGATATCTGCAATTTGAAGTGAAGTCTTGAACCTCTGCTGTACGTCCCAACCCAAATCTCTCAA  
AAGAGAAGCGGTACACTtGCCGAAACGATGGCTCAATGTTTGTAGTGAAGTGGCTCGGTATGGGCTCAGCAGCGGTGCTGTGAAGTGGATCTGCAAGATTGCAAGGCGTCTCTGGGAC  
CGGCCCTTCTACGTACTCATCAACCAGCAGCAATTATTCTCCCCACTGCGTTCAGCCTTAATGAAGCCCCCTCTAGATTCTGGGATGCTCGGCCACCAACGGGTAATGCACCTCAAACCT  
ACTATCTAACTTAAGCAACTCCCGGATTGCAGAACTTTTACCAGCTCCCGGGACGCTATGAACAACTATTGGTTTATTTAAAGTACTACTAACACGCTCAAATTTATATTTATTCAAAT  
TTGCAAAACACATCCATATATTCAATCTACTAAGCTGATTACCTTAAGCTATCAAATATCCTCATGAGCTCGAATTTCCCGGATCGTTCAAACATTGGCAATAAAGTTTCTTAAGATT  
GAATCCTGTTGCCGCTTGGCATGATTATCATATAATTTCTGTTGAATTACGTTAAGCATGTAAATAATTAACATGTAATGCATGACGTTATTTATGAGATGGGTTTTATGATTAGAGT  
CCCGCAATTATACATTTAATACGCGATAGAAAACAAATATAGCGCGCAAACTAGGATAAATATCGCGCGCGGTGTCATCTATGTTACTAGATCGGGAATTC

**Dataset S1C.** Multiple alignments of PVS and PVM 25K and CP coding sequences.

**PVS vs PVM**

**25K ORF**

|                 |                     |         |                                   |                             |
|-----------------|---------------------|---------|-----------------------------------|-----------------------------|
| PVS MK442089.1  | GTATGAGGATGTTT      | AGTGTAT | CGGATGTTTGATAGCTTAGGTAATCAGCTTAGT | GTA                         |
| PVM HM854296.1  | ATTTGAAGTGCTTTAATTA | ---     | GTG-----                          | TAGCTTAGGTATT--GCT--ATTGTA  |
| PVM AJ437481.1  | GTTTGAAGTGCTTTAATTA | ---     | GTG-----                          | TAGCTTAGGTATT--GCT--ATTGTA  |
| PVM JN835299.1  | GTTTGAAGTGCTTTAATTA | ---     | GTG-----                          | TAGCTTAGGTATT--GCT--ATTGTA  |
| PVM AY311394.1  | GTTTGAAGTGCTTTAATTA | ---     | GTG-----                          | TAGCTTAGGTATT--GCT--ATTGTA  |
| PVM AY311395.1  | GTTTGAAGTGCTTTAATTA | ---     | GTG-----                          | TAGCTTAGGTATT--GCT--ATTGTA  |
| PVM MH558036.1  | ATTTGAAGTGCTTTAATTA | ---     | GTG-----                          | TAGCTTAGGTATT--GCT--ATTGTA  |
| PVM MH558037.1  | ATTTGAAGTGCTTTAATTA | ---     | GTG-----                          | TAGCTTAGGTATT--GCT--ATTGTA  |
| PVM D14449.2    | ATTTGAAGTGCTTTAATTA | ---     | GTG-----                          | TAGCTTAGGTATT--GCT--ATTGTA  |
| PVM NC_001361.2 | ATTTGAAGTGCTTTAATTA | ---     | GTG-----                          | TAGCTTAGGTATT--GCT--ATTGTA  |
| PVM JX678982.1  | ATTTGAAGTGCTTTAATTA | ---     | GTG-----                          | TAGCTTAGGTATT--GCT--ATTGTA  |
| PVM EU604672.1  | GTTTGAAGTGCTTTAATTA | ---     | GTG-----                          | TAGCTTAGGTATT--GCT--ATTGTA  |
| PVM MW582794.1  | GTTTGAAGTGCTTTAATTA | ---     | GTG-----                          | TAGCTTAGGTATT--GCT--ATTGTA  |
| PVM MT114149.1  | CTTTGAAGTACTTT      | GATTGGT | AGTG-----                         | TAGCTTAGGTAGT--GCT--ATTGTA  |
| PVM MG356508.1  | GTTTGAAGTGCTTTAGATA | ---     | AGA-----                          | TAGCTTAGGTAGT--GCT--ATTAGGT |
| PVM MG356509.1  | GTTTGAAGTGCTTTAGATA | ---     | AGA-----                          | TAGCTTAGGTAGT--GCT--ATTAGGT |
| PVM MF133527.1  | GTTTGAAGTGCTTTAGATA | ---     | AGG-----                          | TAGCTTAGGTAGT--GCT--ATTAGGT |
| PVM MF133530.1  | GTTTGAAGTGCTTTAGATA | ---     | AGG-----                          | TAGCTTAGGTAGT--GCT--ATTAGGT |
| PVM MW307264.1  | GTTTCGAGTGCTTTAAAG  | GA      | GAGG-----                         | TAGCTTAGGTAGT--GCT--GTAGAT  |
| PVM MF133528.1  | GTTTGAAGTGCTTTAAATA | ---     | GG-----                           | TAGCTTAGGTAGT--GCT--ATTAGGT |
| PVM MF133529.1  | GTTTGAAGTGCTTTAAATA | ---     | GG-----                           | TAGCTTAGGTAGT--GCT--ATTAGGT |
| PVM KY364848.1  | ATTTGAAGTGCTTTAAATA | ---     | GG-----                           | TAGCTTAGGTAGT--GCT--ATTAGGT |
| PVM MT114148.1  | GTTTGAAGTGCTTTAGATA | ---     | GG-----                           | TAGCTTAGGTAGT--GCT--ATAGGT  |
|                 | * ** *              | *** *   | **                                | ***** * *** *               |

|                 |                                                               |                                         |                      |                |
|-----------------|---------------------------------------------------------------|-----------------------------------------|----------------------|----------------|
| PVS MK442089.1  | TTGAATA--TATGGATGTGTTTTTGCA                                   | ATT                                     | TTGAATAAATA          | AAGTTGAGCGTGTA |
| PVM HM854296.1  | TYGAATATTTATGGAYGTGAT                                         | CTAGATTGTTGTGTATAAATACAAGTTTGAGCG       | CTTAAA               |                |
| PVM AJ437481.1  | TTGAATATTTATGGATGTGATTGTAGATTGTTGTGTATAAATACAAGTTTGAGCGTTTAA  |                                         |                      |                |
| PVM JN835299.1  | TTGAATATTTATGGATGTGATTGTAGATTGTTGTGTATAAATACAAGTTTGAGCGTTTAAA |                                         |                      |                |
| PVM AY311394.1  | TTGAATATTTATGGATGTGATTGTAGATTGTTGTGTATAAATACAAGTTTGAGCGTTTAA  |                                         |                      |                |
| PVM AY311395.1  | TTGAATATTTATGGATGTGATTGTAGATTGTTGTGTATAAATACAAGTTTGAGCGTTTAAA |                                         |                      |                |
| PVM MH558036.1  | TTGAATATTTATGGATGTGATTGTAGATTGTTGTGCATAA                      | G                                       | TACAAGTTTGAGCGTTTAAA |                |
| PVM MH558037.1  | TTGAATATTTATGGATGTGATTGTAGATTGTTGTGCATAA                      | G                                       | ACAAGTTTGAGCGTTTAAA  |                |
| PVM D14449.2    | TTGAATATTTATGGATGTGATTGTAGATTGTTGTGTATAAATACAAGTTTGAGCGTTTAA  |                                         |                      |                |
| PVM NC_001361.2 | TTGAATATTTATGGATGTGATTGTAGATTGTTGTGTATAAATACAAGTTTGAGCGTTTAA  |                                         |                      |                |
| PVM JX678982.1  | TTGAATATTTATGGATGTGATTGTAGATTGTTGTGTATAAATACAAGTTTGAGCGTTTAA  |                                         |                      |                |
| PVM EU604672.1  | TTGAATATTTATGGATGTGATTGTAGATTGTTGTGTATAAATACAAGTTTGAGCGTCTAAG |                                         |                      |                |
| PVM MW582794.1  | TTGAATATTTATGGATGTGATTGTAGATTGTTGTGTATAAATACAAGTTTGAGCGCTTAA  |                                         |                      |                |
| PVM MT114149.1  | TTGAATATTTATGGATGTACTTGTAGATTTATTCATAA                        | GTAAAGTTTGAGCGTTTGAA                    |                      |                |
| PVM MG356508.1  | TTGAATATTTATGGATGTGTTGTAGAA                                   | TTGTTGTGTAAGTATAAAGTTTGAACGTTTGCA       |                      |                |
| PVM MG356509.1  | TTGAATATTTATGGATGTGTTGTAGAA                                   | TTGTTGTGTAAGTATAAAGTTTGAACGTTTGCA       |                      |                |
| PVM MF133527.1  | TTGAATATTTATGGATGTGTTGTAGAA                                   | TTGTTGTGTAAGTATAAAGTTTGAACGTTTGCA       |                      |                |
| PVM MF133530.1  | TTGAATATTTATGGATGTGTTGTAGAA                                   | TTGTTGTGTAAGTATAAATTTGAACGTTTGCA        |                      |                |
| PVM MW307264.1  | TTGAATATTTATGGACGTACTTGTAGAA                                  | TTATTGTATAAATAAAGTTTGAGCGTTTGCA         |                      |                |
| PVM MF133528.1  | TTGAATATTTATGGATGTGTTGTAGAA                                   | TTGTTGTGTAAGTATAAAGTTTGAACGTTTGCA       |                      |                |
| PVM MF133529.1  | TTGAATATTTATGGATGTGTTGTAGAA                                   | TTGTTGTGTAAGTATAAAGTTTGAACGTTTGCA       |                      |                |
| PVM KY364848.1  | TTGAATATTTATGGATGTAGT                                         | CTGAGAGTTGTTGTATAAATACAAGTTTGAACGTTTGCA |                      |                |
| PVM MT114148.1  | TTGAATATTTATGGATGTGTTGTAGAA                                   | CTGTTGTGTAAGTATAAAGTTTGAACGTTTGCA       |                      |                |
|                 | * *****                                                       | *****                                   | *****                | *****          |



GCAAATTTGCTGGTTTGGACGAGTACACACTCTGTTGACTGAAGTGC---CTCCG---G  
 GCAAAATTTGGTTTGGTCTGGACGAGTACACTCTGTTGACTGAAGTGC---CCCG---G  
 GCAAACTTGTGGTTTGGACGAGTACACTTTATTGACTGAAGTGC---CCCC---G  
 GCAAATTTGCTGGTTTGGACGAGTACACTCTGTTGACTGAAGTGC---CCCC---G  
 GCAAAATTTGGTTTGGTCTGGACGAGTACACTCTGTTGACTGAAGTGC---CCCG---G  
 GCAAAATTTGTGGTTTGGAGAGTACACCTGTTAACTGAAGTGC---CCCC---G  
 GCAATTGTTGGTTCTGGAGAGTACACTCTGTTGACTGAAGTGC---CTCCG---G  
 GCAAATTTGTGGTTCTGGACGAGTACACTCTGTTGACTGAAGTGC---CTCCG---G  
 GCAAATTTGCTGGTTCTGGACGAGTACACTCTGTTGACTGAAGTGC---CCCC---G  
 GCAAAATTTGGTTCTGGACGAGTACACTCTGTTGACCGAAGTGC---CTCCG---G  
 GCAAATTTGTGGTTCTGGACGAGTACACTCTGTTGACCGAAGTGC---CTCCG---G  
 GCAAGTTCTAGTATGACAGGATACACTGCTGACAGAGGTGC---CTAGA---G  
 GTAAGTATCTAGTCTAGAGAGTACACGCTGCTAGCTGAGGTAC---CCAGA---G  
 GTAAGTATCTAGTCTAGAGAGTACACGCTGCTAGCTGAGGTAC---CCAGA---G  
 GTAAGTATCTAGTCTGAGAGTACACGCTGCTAGCTGAGGTAC---CCAGA---G  
 GTAAGTACTGGTTCTGGACGAGTATACCTACTACTGAGGTGC---CTGAG---G  
 GTAAGCACTTGATTTGGACGAGTACAGCTTGCTAACAGAAGTGC---CGAG---G  
 GTAAGCACTTGATTTGGACGAGTACAGCTTGCTAGTGAAGTGC---CGAG---G  
 GTAAGCACTTGATTTGGACGAGTACAGCTTGCTAGTGAAGTGC---CGAG---G  
 GCAAGCACTTGATTTGGACGAGTACAGCTTGCTAGTGAAGTGC---CGAG---G

\*\*\*\*\*  
 \*\*\*\*\*  
 \*\*\*\*\*

[illegible][illegible]

[illegible]

\* CC AGGGA ACTATTGTGTTTTCGAGCCGGAAGTGGAGAGTTGCTGACAGCCAG  
 AACCTCTGGGAAAGATTGTGTTTTTCGAGGAGGAAGTGGGTTGCTTCTGAGATCACAG  
 AACCTTTGGGAAAGTTGTGTTTTTCGAGGAGGAAGTGGGTTGCTTCTGAGATCACAG  
 AACCTTTGGGAAAGTTGTGTTTTTCGAGGAGGAAGTGGGTTGCTTCTGAGATCACAG  
 AACCTTTGGGAAAGTTGTGTTTTTCGAGGAGGAAGTGGGTTGCTTCTGAGATCACAG  
 AACCTTTGGGAAAGTTGTGTTTTTCGAGGAGGAAGTGGGTTGCTTCTGAGATCACAG  
 AACCTCAGGGAAAGTCTGTTTTCGAGGAGGAAGTGGGTTGCTTCTGAGATCACAG  
 AACCTCAGGAAAGTCTGTTTTCGAGGAGGAAGTGGGTTGCTTCTGAGATCACAG  
 AACCCCTGGGCAAAGTTGTGTTTCAGAGGAGGAAGTGGGTTGCTTCTGAGATCACAG  
 AACCCCTGGGCAAAGTTGTGTTTCAGAGGAGGAAGTGGGTTGCTTCTGAGATCACAG  
 AACCCCTGGGCAAAGTTGTGTTTCAGAGGAGGAAGTGGGTTGCTTCTGAGATCACAG  
 AACCCCTGGGCAAAGTTGTGTTTCAGAGGAGGAAGTGGGTTGCTTCTGAGATCACAG  
 AACCCCTGGGCAAAGTTGTGTTTCAGAGGAGGAAGTGGGTTGCTTCTGAGATCACAG  
 ATCCGAGGGGGTGGTGTGATTTTCAGAGAGGAGTGGGTTGCTTCTGAGATCACAG  
 AACCAGAGGGCGTGGTGTGATTTTCAGGAAAGTGGGTTGCTTCTAAGAGCATATG  
 AACCAGAGGGCGTGGTGTGATTTTCAGGAAAGTGGGTTGCTTCTAAGAGCATATG  
 AACCAGAAGCGTGGTGTGATTTTCAGGAAAGTGGGTTGCTTCTAAGAGCATATA  
 AACCAGAAGCGTGGTGTGATTTTCAGGAAAGTGGGTTGCTTCTAAGAGCATATA  
 AACCAGAGGGAGTGGTAGTATATTTCAGGAAAGTGGGTTGCTTCTCAGAGCGCATAT  
 AGCCAGAGGGAGTGGTGTATATTTCGAGGAGGAAGTAGGTTGCTGCTTAAAGCGCATAT  
 AACCAGAGGGAGTGGTGTATATTTCGAGGAGGAAGTAGGTTGCTGCTTAAAGCGCATAT  
 AGCCAGAGGGAGTGGTGTATATTTCGAGGAGGAAGTAGGTTGCTGCTTAAAGCGCATAT  
 AACCAGAGGGAGTGGTGTATATTTCGAGGAGGAAGTAGGTTGCTGCTTAAAGCGCATAT  
 \* \*\* \* \* \* \* \* \* \* \* \* \* \* \* \* \* \* \* \* \* \* \* \* \* \* \* \* \* \* \*

[illegible]





[illegible][illegible]

-----[ATG][AGA][CTAT][TGGAGCAGAGGCT][TCAGAT][AT][GAAC]  
GTGCTGCAGATGCTGATGGAGAGATGTCATTGGAGCGGAGGCTTGACAGCCTCCGAGAAT  
GTACTGCAGATGCTGATGGAGAGATGTCATTGGAGCGGAGGCTTGATAGTCTCCGAGAAT  
GTACTGCAGATGCTGATGGAGAGATGTCATTGGAGCGGAGGCTTGATAGTCTCCGAGAAT  
GTGCTGCAGATGCTGATGGAGAGATGTCATTGGAGCGGAGGCTTGATAGTCTCCGAGAAT  
GTGCTGCAGATGCTGATGGAGAGATGTCATTGGAA[CGGAGGCTTGACAGCCTCCGAGAAT  
GTGCTGCAGATGCTGATGGAGAGATGTCATTGGA[CGGAGGCTTGACAGCCTCCGAGAAT  
GTGCTGCAGATGCTGATGGAGAGATGTCATTGGAGCGGAGGCTTGACAGCCTCCGAGAAT  
GTGCTGCAGATGCTGATGGAGAGATGTCATTGGAGCGGAGGCTTGACAGCCTCCGAGAAT  
GTGCTGCAGATGCTGATGGAGAGATGTCATTGGAGCGGAGGCTTGACAGCCTCCGAGAAT  
GTGCTGCAGATGCTGATGGAGAGATGTCATTGGAGCGGAGGCTTGACAGCCTCCGAGAAT  
GTGCTGCAGATGCTGATGGAGAGATGTCATTGGAGCGGAGGCTTGACAGCCTCCGAGAAT  
GCAAGCTGAGGCTGATGGA[AGAGGCTGCTGGAGCGCAGATG][ACAGCT][TGC][GAAT  
GCAATGCTACAAATGAAGAGAGATCATCTTTGGAACGTAGGCTTGACAGCCTACGCGACT  
GCAATGCTACAAATGAAGAGAGATCATCTTTGGAACGTAGGCTTGACAGCCTACGCGACT  
GCAATGCTACAAATGAAGAGAGATCATCTTTGGAACGTAGGCTTGACAGCCTACGCGACT  
GCAATGCTACAAATGATGAGAAGCGTCCCTTGGAGCGTAGGTTGGACAGTTTTCGGGATT  
ACAATGCTGCAAAACGAGGAAGATCTCTCTGGAGCGTAGGTTGGACAGCTTCGCGACT  
ACAATGCTGCGAACGAGGAAGATCTCTCTGGAGCGTAGGTTAGACAGCTTCGCGACT  
ACAATGCTGCGACGAGGAAGATCTCTCTGGAA[CGTAGGTTGGACAGCTTACGCGACT  
ACAATGCTGCGAACGAGGAAGATCTCTCTGGAA[CGAGGTTGGACAGCTTACGCGACT  
\*\*\* \*\* \*\*\*\*\* \*\*\*\* \* \*\*

[illegible][illegible][illegible]



[illegible][illegible][illegible]



```
PVS MK442089.1      AATGAAG---GCAGACCGTTAGCCATGTTATTA-----TTGTGTGTCCATCG
PVM HM854296.1      TAGGAAATGAAGCACGTAACCAGGGTGGCTTTACTTATAGCGAGAGCTATGTGTACTTCT
PVM AJ437481.1      TAGAAAAATGAAGCACGTAACCAGGGTGGCTTTAATTATAGCGAGAGCTATGTGTACTTCT
PVM JN835299.1      TAGAAAAATGAAGCACGTAACCAGGGTGGCTTTAATTATAGCAAGAGCTATGTGTACTTCT
PVM AY311394.1      TAGAAAAATGAAGCACGTAACCAGGGTGGCTTTAATTATAGCGAGAGCTATGTATACTTCT
PVM AY311395.1      TAGAAAAATGAAGCACGTAACCAGGGTGGCTTAATAATAGCGAGAGCTATGTGTACTTCT
PVM MH558036.1      TAGAAAAATGAAGCACGTAACCAGGGTGGCTTTACTTATAGCGAGAGCTATGTGTATTCT
PVM MH558037.1      TAGAAAAATGAAGCACGTAACCAGGGTGGCTTTACTTATAGCGAGAGCTATGTGCATTCT
PVM D14449.2        TAGAAAAATGAAGGACGTAACCAAGGTGGCTTTACTTATAGCGAGAGCTATGTGTGCCTCT
PVM NC_001361.2     TAGAAAAATGAAGGACGTAACCAAGGTGGCTTTACTTATAGCGAGAGCTATGTGTGCCTCT
PVM JX678982.1      TAGAAAAATGAAGCACGTAACCAAGGTGGCTTTACTTATAGCGAGAGCTATGTGTACTTCT
PVM EU604672.1      TAGAAAAATGAAGCACGTAACCAAGGTGGCTTTACTTATAGCGAGAGCTATGTGTACTTCT
PVM MW582794.1      TAGAAAAATGAAGCACGTAACCAAGGTGGCTTTACTTATAGCGAGAGCTATGTGTACTTCT
PVM MT114149.1      TAATAAATGAAGTGTGTGACCCAGACTGCGTTGCTTGTAGCTAGGGCTTTGTTTTGCAT
PVM MG356508.1      CATAAATGAAGTGGGTAACTCGGGCAGCTTTACTTGTAGCAAGGGCAATGTACTTACAT
PVM MG356509.1      CATAAATGAAGTGGGTAACTCGGGCAGCTTTACTTGTAGCAAGGGCAATGTACTTACAT
PVM MF133527.1      CATAAATGAAGTGGGTAACTCGTGCTGCTTTACTTGTAGCAAGGGCAATGTACTTACGT
PVM MF133530.1      CATAAATGAAGTGGGTAACTCGGGCTGCTTTACTTGTAGCAAGGGCAATGTACTTACAT
PVM MW307264.1      CATAAATGAAGTGTGTGCTAGAACGCTTTTGTAGTAGCTAGGGCAATGTATTACAT
PVM MF133528.1      TAATAAATGAAGTGTGTGACTCAAACGCTTTACTTGTAGCTAGGGCTATGTATTACAT
PVM MF133529.1      TAATAAATGAAGTGTGTGACTCAAACGCTTTACTTGTAGCTAGGGCTATATATTACAT
PVM KY364848.1      TAATAAATGAAGTGTGTGACTCGAAGCTGCTTTACTTGTAGCTAGGGCTATGTATTACAT
PVM MT114148.1      TAATAAATGAAGTGTGTGACTCGAACCCTTTACTTGTAGCTAGGGCTATGTATTACAT
*      *      *      *      *      *      *
```

PVS  
25K ORF

```

FF418029.1 -----GTGATAGGAGAGTTTGACAGCTTAGGTAATCAGCTTAGTAGTATTGA--AT
KR152654.1 -----GTGATAGGAGATGTTTGATACGCTTAGGTAATCAGCTTAGTAGTATTGA--AT
MF418035.1 -----GTGATAGGAGATGTTTGATAGCTTAGGTAATCAGCTTAGTAGTATTGA--AT
MF418032.1 -----GTTATAGGAGAGTTTGACAGCTTAGGTAATCAGCTGCTAGTATTGA--AT
MF496659.1 -----GTGATAGGAGAGTTTGACAGCTTAGGTAATCAGCTTAGTAGTATTGA--AT
MF418028.1 -----GTGATAGGAGAGTTTGACAGCTTAGGTAATCAGCTTAGTAGTATTGA--AT
MH282867.1 -----GTGATAGGAGAGTTTGACAGCTTAGGTAATCAGCTTAGTAGTATTGA--AT
MK563994.1 -----GTGATAGGAGAGTTTGACAGCTTAGGTAATCAGCTTAGTAGTATTGA--AT
JQ647830.1 -----GTGATAGGAGAGTTTGACAGCTTAGGTAATCAGCTTAGTAGTATTGA--AT
MN095414.1 -----GTGATAGGAGAGTTTGACAGCTTAGGTAATCAGCTTAGTAGTATTGA--AT
KU058657.1 -----GTGATAGGAGAGTTTGACAGCTTAGGTAATCAGCTTAGTAGTATTGA--AT
KU896946.1 -----GTGATAGGAGAGTTTGACAGCTTAGGTAATCAGCTTAGTAGTATTGA--AT
MF033144.1 -----GTGATAGGAGAGTTTGACAGCTTAGGTAATCAGCTTAGTAGTATTGA--AT
MF418030.1 -----GTGATAGGAGATGTGGATAGCTTAGGTAATCAGCTTAGTAGTATTGA--AT
MF418031.1 -----GTGATAGGAGATGTTTGATAGCTTAGGTAATCAGCTTAGTAGTATTGA--AT
KP089978.1 -----GTGATAGGAGATGTTTGATAGCTTAGGTAATCAGCTTAGTAGTATTGA--AT
KU896945.1 -----GTGATAGGAGATGTTTGATAGCTTAGGTAATCAGCTTAGTAGTATTGA--AT
LC375228.1 -----GTGATAGGAGATGTTTGATAGCTTAGGTAATCAGCTTAGTAGTATTGA--AT
KC430335.1 -----GTGATAGGAGATTTGATAGCTTAGGTAATCAGCTTAGTAGTATTGA--AT
MF418033.1 -----GTGATAGGAGATGTTTGATAGCTTAGGTAATCAGCTTAGTAGTATTGA--AT
MW331321.1 -----GTGATAGGAGATGTTTGATAGCTTAGGTAATCAGCTTAGTAGTATTGA--AT
LC375227.1 -----GTGATAGGAGATGTTTGATAGCTTAGGTAATCAGCTTAGTAGTATTGA--AT
MF375506.1 -----GTGATAGGAGATGTTTGATAGCTTAGGTAATCAGCTTAGTAGTATTGA--AT
MK442089.1 ATGTTTGAGTGTATGAGGATGTTTGATAGCTTAGGTAATCAGCTTAGTAGTATTGA--AT
AJ863510.1 -----GTGATAGGAGATGTTTGATAGCTTAGGTAATCAGCTTAGTAGTATTGA--AT
D00461.1 -----GTGATAGGAGAGTTTGACAGCTTAGGTAATCAGCTTAGTAGTATTGAATAT
          * * * * *

```

MF418029.1 ATATGGATGTGTTTTGCAAGCTTTTGAATAAATAAAGTTTGAGCGGTGTAGTAGTACGCT  
 KR152654.1 ATATGGATGTGTTTTGCAAAATCTGAATAAATAAATAAGTTTGAGCGGTGTAGTAGTACTCT  
 MF418035.1 ATATGGATGTGTTTTGCAAAATCTGAATAAATAAATAAGTTTGAGCGGTGTAGTAGTACTCT  
 MF418032.1 ATATGGATGTGTTTTGCAAGCTTTTGAATAAGTAAAGTTTGAGCGGTGTAGCATGACTACT  
 MF496659.1 ATATGGATGTGTTTTGCAAGCTTTTGAATAAGTAAAGTTTGAGCGGTGTAGTAGTACTCT  
 MF418028.1 ATATGGATGTGTTTTGCAAGCTTTTGAATAAATAAAGTTTGAGCGGTGTAGTAGTACTCT  
 MH282867.1 ATATGGATGTGTTTTGCAAGCTTTTGAATAAATAAAGTTTGAGCGGTGTAGTAGTACTCT  
 MF563994.1 ATATGGATGTGTTTTGCAAGCTTTTGAATAAATAAAGTTTGAGCGGTGTAGTAGTACTCT  
 JQ647830.1 ATATGGATGTGTTTTGCAAGCTTTTGAATAAATAAAGTTTGAGCGGTGTAGTAGTACTCT  
 MN095414.1 ATATGGATGTGTTTTGCAAGCTTTTGAATAAATAAAGTTTGAGCGGTGTAGTAGTACTCT  
 KU058657.1 AATAGGATGTGTTTTGCAAGCTTTTGAATAAATAAAGTTTGAGCGGTGTAGTAGTACTCT  
 KU896946.1 ATATGGATGTGTTTTGCAAGCTTTTGAATAAATAAAGTTTGAGCGGTGTAGTAGTACTCT  
 MF033144.1 ATATGGATGTGTTTTGCAAGCTTTTGAATAAATAAAGTTTGAGCGGTGTAGTAGTACTCT  
 MF418030.1 ATATGGATGTGTTTTGCAAAATTTTGAATAAATAAAGTTTGAGCGGTGTAGTAGTACTCT  
 MF418031.1 ATATGGATGTGTTTTGCAAAATTTTGAATAAATAAAGTTTGAGCGGTGTAGTAGTACTCT  
 KP089978.1 ATATGGATGTGTTTTGCAAAATTTTGAATAAATAAAGTTTGAGCGGTGTAGTAGTACTCT  
 KU896945.1 ATATGGATGTGTTTTGCAAAATCTGAATAAATAAAGTTTGAGCGGTGTAGTAGTACTCT  
 LC375228.1 ATATGGATGTGTTTTGCAAGCTTTTGAATAAATAAAGTTTGAGCGGTGTAGTAGTACTCT  
 KC430335.1 ATATGGATGTGTTTTGCAAAATTTTGAATAAATAAAGTTTGAGCGGTGTAGTAGTACTCT  
 MF418033.1 ATATGGATGTGTTTTGCAAAATTTTGAATAAATAAAGTTTGAGCGGTGTAGTAGTACTCT  
 MW331321.1 ATATGGATGTGTTTTGCAAAATTTTGAATAAATAAAGTTTGAGCGGTGTAGTAGTACTCT  
 LC375227.1 ATATGGATGTGTTTTGCAAGCTTTTGAATAAATAAAGTTTGAGCGGTGTAGTAGTACTCT  
 MF375506.1 ATATGGATGTGTTTTGCAAAATTTTGAATAAATAAAGTTTGAGCGGTGTAGTAGTACTCT  
 MK442089.1 ATATGGATGTGTTTTGCAAAATTTTGAATAAATAAAGTTTGAGCGGTGTAGTAGTACTCT  
 AJ863510.1 ATATGGATGTGTTTTGCAAAATTTTGAATAAATAAAGTTTGAGCGGTGTAGTAGTACTCT  
 D00461.1 ATATGGATGTGTTTTGCAAGCTTTTGAATAAATAAAGTTTGAGCGGTGTAGTAGTACTCT

\*\*\*\*\*

```

MF418029.1    TAAATAAACCAATAGTTGTTTCATAGTGTACCGGGGCTGGTGAAGAGTTCGCAATTAGGG
KR152654.1    TAAATAAACCAATAGTTGTTTCATAGTGTACCGGGAGCTGGTAAAGTTCGCCAATTAGGG
MF418035.1    TAAATAAACCAATAGTTGTTTCATAGTGTACCGTGGAGCTGGTAAAGTTCGTCATTAGGG
MF418032.1    TAAATAAACCAATAGTTGTTGCATAGTGTCCAGGAGCTGGTAAAGTTCGCCAATTAGGG
MF496659.1    TACATAAAGCCGATTTGTTGTCATAGTGTCCCGAGGAGCTGGTAAAGTTCGCCAATTAGGG
MF418028.1    TAAATAAACCAATAGTTGTTGCATAGTGTCCAGGTGGTAAAGTTCGCCAATTAGGG
MM282867.1    TGAATAAACCAATAGTTGTTGCATAGTGTCCAGGTGGTGGTAAAGTTCGTCATTAGGG
MK563994.1    TGAATAAACCAATAGTTGTTGCATAGGTCCAGGTGGTGGTAAAGTTCGTCATTAGGG
JQ647830.1    TGAATAAACCAATAGTTGTTGCATAGTGTCCAGGTGGTGGTAAAGTTCGCCAATTAGGG
MN095414.1    TGAATAAACCAATAGTTCGTCATAGTGTCCAGGTGGTGGTAAAGTTCGCCAATTAGGG
KU058677.1    TGAATAAACCAATAGTTGTTACATAGCTCCAGGTGGTGGTAAAGTTCGCCAATTAGGG
KU896946.1    TGAATAAACCAATAGTTGTTACATAGCTCCAGGTGGTGGTAAAGTTCGCCAATTAGGG
MF033144.1    TGAATAAACCAATAGTTGTTACATAGCTCCAGGTGGTGGTAAAGTTCGCCAATTAGGG
MF418030.1    TAAATAAACCAATAGTTGTTTCATAGTGTCCCGGAGCTGGTAAAGTTCGCAATTAGGG
MF418031.1    TAAATAAACCAATAGTTGTTTCATAGTGTCCCGGAGCTGGTAAAGTTCGCAATTAGGG
KP089978.1    TAAATAAACCAATAGTTGTTTCATAGTGTCCCGGAGCTGGTAAAGTTCGCAATTAGGG
KU896945.1    TAAATAAACCAATAGTTGTTTCATAGTGTCCCGGAGCTGGTAAAGTTCGCAATTAGGG
LC375228.1    TAAATAAACCAATAGTTATTCATAGTGTCCCGGAGCTGGTAAAGTTCGCCAATTAGGG
KC430335.1    TAAATAAACCAATAGTTGTTTCATAGTGTCCCGGAGCTGGTAAAGTTCGCAATTAGGG
MF418033.1    TAAATAAACCAATAGTTGTTTCATAGTGTCCCGGAGCTGGTAAAGTTCGCAATTAGGG
MW331321.1    TAAATAAACCAATAGTTGTTTCATAGTGTCCCGGAGCTGGTAAAGTTCGCAATTAGGG
LM33527.1     TACATAAACCAATAGTTGTTTCATAGTGTCCCGGAGCTGGTAAAGTTCGCCAATTAGGG
MF375506.1    TAAATAAACCAATAGTTGTTTCATAGTGTCCCGGAGCTGGTAAAGTTCGCAATTAGGG
MK442089.1    TAAATAAACCAATAGTTGTTTCATAGTGTCCCGGAGCTGGTAAAGTTCGCAATTAGGG
AJ863510.1    TAAATAAACCAATAGTTGTTTCATAGTGTCCCGGAGCTGGTAAAGTTCGCCAATTAGGG
D00461.1     TAAATAAACCAATAGTTGTTTCATAGTGTCCAGGTGGTGGTAAAGTTCGCCAATTAGGG
*****

```



MF418029.1 AGCTGTTGAAGTTAGATAGTAGGTTTGAAGTGCATTACCCGCGGTCGTCAGACATTCCCA  
KR152654.1 AATTGTTGAAGTTAGATAGTAGGTTTGAAGTGTATCACTCGTGGTCGCCAGACATTCCAA  
MF418035.1 AATTGTTGAAGTTAGATAGTAGGTTTGAAGTGTATCAACCCGTGGTCGCCAGACATTCCAA  
MF418032.1 AGTTACTGAAGTTAGATAGTAGGTTTGAAGTGCATCAACCCGTGGTAGGCCAGACATACCCA  
MF496659.1 AATTACTGAAGTTAGATAGTAGGTTTGAAGTGCATCAACCCGTGGTCGGCCGATATACCCA  
MF418028.1 AGTTACTGAAGTTAGATAGTAGGTTTGAAGTGCATCAACCCGTGGCCGGCCAGATATTCCCA  
MH282867.1 AGTTGCTGAAGTTAGATAGTAGGTTTGAAGTGCATTACCCGCGGCCGGCCAGATATTCCCA  
MK563994.1 AGTTACTGAAGTTAGATAGTAGGTTTGAAGTGCATCAACCCGTGGCCGGCCAGATATTCCCA  
JQ647830.1 AGTTACTGAAGTTAGATAGTAGGTTTGAAGTGCATCAACCCGTGGCCGGCCAGATATTCCCA  
MN095414.1 AGTTACTGAAGTTAGATAGTAGGTTTGAAGTGCATCAACCCGTGGCCGGCCAGATATTCCCA  
KU058657.1 AGTTACTGAAGTTAGATAGTAGGTTTGAAGTGCATCAACCCGTGGCCGGCCAGATATTCCCA  
KU896946.1 AGTTACTGAAGTTAGATAGTAGGTTTGAAGTGCATCAACCCGTGGCCGGCCAGATATTCCCA  
MF033144.1 AGTTACTGAAGTTAGATAGTAGGTTTGAAGTGCATCAACCCGTGGCCGGCCAGATATTCCCA  
MF418030.1 AGTTGCTTAAGTTAGATAGTAGATTGAGTGCATTACCGCGTGGCCAGACATCCCA  
MF418031.1 AGTTGCTTAAGTTAGATAGTAGATTGAGTGCATTACCCGCGTGGCCAGACATCCCA  
KP089978.1 AGTTGCTTAAGTTAGATAGTAGGTTTGAAGTGCATCAACCCGTGGCCGGCCAGACATCCCA  
KU896945.1 AGTTGCTTAAGTTAGATAGTAGGTTTGAAGTGCATTACCCGTGGCCGGCCAGACATCCCA  
LC375228.1 AGTTGCTTAAGTTAGATAGTAGGTTTGAAGTGCATTACCCGTGGCCGGCCAGACATCCCA  
KC430335.1 AGTTGCTTAAGTTAGATAGTAGGTTTGAAGTGCATTACCCGTGGCCGGCCAGACATCCCA  
MF418033.1 AATTGCTTAAGTTAGATAGTAGGTTTGAAGTGCATTACCCGTGGCCGGCCAGACATCCCA  
MW331321.1 AGTTGCTTAAGTTAGATAGTAGGTTTGAAGTGCATTACCCGTGGCCGGCCAGACATCCCA  
LC375227.1 AGTTGCTTAAGTTAGATAGTAGGTTTGAAGTGCATTACCCGTGGCCGGCCAGACATCCCA  
MF375506.1 AGTTGCTTAAGTTAGATAGTAGGTTTGAAGTGCATTACCCGTGGTGGCCAGACATCCAA  
MK442089.1 AGTTGCTTAAGTTAGATAGTAGGTTTGAAGTGCATTACCCGTGGCCGGCCAGACATCCCA  
AJ863510.1 AATTACTGAAGTTAGATAGTAGGTTTGAAGTGCATTACCCGTGGCCGGCCAGACATTCCCA  
D00461.1 AATTACTGAAGTTAGATAGTAGGTTTGAAGTGCATTACCCGTGGCCGGCCAGACATTCCCA  
\*\*\*\*\*

MF418029.1 ATTTGGAAGGGGCTTTTATTAAGGCAAGAGCGTAGTGGTGAAATAAGCTACTGCTGGTTG  
KR152654.1 ATTTGAGGGGCGCTTTTATCAAAGCTGAACGTAGCGGTGAAATAAGCTACTACTGGTTG  
MF418035.1 ATTTGAGGGTCTTTTATCAAAGCTGAACGTAGCGGTGAAATAAGCTACTACTGGTTG  
MF418032.1 ATCTAGAGGGAGCTTTTCATCAAGGCTGAACCGAGTGGTGAGGATAAGTTGCTGTGGTGG  
MF496659.1 ATCTAGAGGGGCTTTTCATTAAGGCCGAGCGTTGTGGTGAGAATAAGTTGTGTGTGGTGG  
MF418028.1 ATCTAGAGGGGCTTTTCATCAAGAGCGAACGTAGTGGTGAGAATAAGTTGTGTGTGGTGG  
MH282867.1 ATCTAGAGGGGCTTTTCATCAAGGGCGAACGTAGTGGTGAGAATAAGTTGTGTGTGGTGG  
MK563994.1 ATCTAGAGGGGCTTTTCATCAAGGGCGAACGTAGTGGTGAGAATAAGTTGTGTGTGGTGG  
JQ647830.1 ATCTAGAGGGAGCTTTTCATCAAGAGCGAACGTAGTGGTGAGGATAAGCTGTGTGTGGTGG  
MN095414.1 ATCTAGAGGGTGTCTTTTCATCAAGGGCGAACGTAGTGGTGAGGATAAGCTGTGTGTGGTGG  
KU058657.1 ATCTAGAGGGTGTCTTTTCATCAAGGGCGAACGTAGTGGTGAGGATAAGCTGTGTGTGGTGG  
KU896946.1 ATCTAGAGGGTGTCTTTTCATCAAGGGCGAACGTAGTGGTGAGGATAAGCTGTGTGTGGTGG  
MF033144.1 ATCTAGAGGGTGTCTTTTCATCAAGGGCGAACGTAGTGGTGAGGATAAGCTGTGTGTGGTGG  
MF418030.1 ATCTAGAGGGGCTTTTCATCAAGGCTGAGCGCGGTGGGAGAGAATAAATTGTGTGTGGTGG  
MF418031.1 ATCTGAGGGGCTTTTCATCAAGGCTGAGCGCGGTGGGAGAGAATAAATTGTGTGTGGTGG  
KP089978.1 ATCTAGAGGGAGCTTTTCATCAAGGCTGAGCGCGAGTGGGAGAGAATAAATTGTGTGTGGTGG  
KU896945.1 ATCTAGAGGGGCTTTTCATCAAGGCTGAGCGTAGTGGGAGAGAATAAATTGTGTGTGGTGG  
LC375228.1 ATCTAGAGGGGCTTTTCATCAAGGCTGAGCGTAGTGGGAGAGAATAAATTGTGTGTGGTGG  
KC430335.1 ATCTAGAGGGGCTTTTATTAAGGCTGAGCGAGTGGGAGGATAAATTGTGTGTGGTGG  
MF418033.1 ATCTAGAGGGGCTTTTCATTAAGGCTGAGCGAGTGGGAGAGAATAAATTGTGTGTGGTGG  
MW331321.1 ATCTAGAGGGGCTTTTCATCAAGGCCGAGACGTAGTGGGAGAGAATAAATTGTGTGTGGTGG  
LC375227.1 ATCTAGAGGGGCTTTTCATCAAGGCTGAGCGAGTGGGAGAGAATAAATTGTGTGTGGTGG  
MF375506.1 ATCTAGAGGGGCTTTTCATCAAGGCTGAGCGAGTGGGAGAGAATAAATTGTGTGTGGTGG  
MK442089.1 ATCTAGAGGGGCTTTTCATCAAGGCTGAGCGAGTGGGAGAGAATAAATTGTGTGTGGTGG  
AJ863510.1 ATCTAGAGGGAGCTTTTCATCAAGGCCGAGACGTAGTGGTGAGGATAAGCTGTGTGTGGTGG  
D00461.1 ATCTAGAGGGAGCTTTTCATCAAGGCCGAGACGTAGTGGTGAGGATAAGCTGTGTGTGGTGG  
\*\*\*\*\*

MF418029.1 ATGAGTACATAGAGGGGCCATTCCAGAGGACGCATTGCAATCTTTCGCAGATCCGCTAC  
KR152654.1 ATGAGTACATAGAGGGACCTATCCAGAGGACGCATTGCGATCTTCGCAGATCCGCTAC  
MF418035.1 ATGAGTACATAGAGGGACCTATTCCAGAGGACGCATTGCGATCTTCGCAGATCCGCTAC  
MF418032.1 ACAGTATATAGAGGGACCCATTCCGAGGAAGCCTTTGCAATCTTTCGCGATCCACTAC  
MF496659.1 ATGAGTACATAGAGGGGCCAATTCCAGAGGAAGCCTTTGCGATCTTTCGCGATCCACTAC  
MF418028.1 ATGAGTACATAGAGGGGCCGTTCCGAGGAAGCCTTTGCAATCTTTCGAGATCCACTGC  
MH282867.1 ATGAGTACATAGAGGGGCCGTTCCGAGGAAGCCTTTGCTATCTTTTCGAGATCCACTGC  
MK563994.1 ATGAGTACATAGAGGGGCCGTTCCGAGGAAGCCTTTGCTATCTTTGCGATCCACTGC  
JQ647830.1 ACAGTACATAGAGGGGCCGTTCCGAGGACGCTTTGCAATCTTTCGAGATCCGCTGC  
MN095414.1 ACAGTACATAGAGGGGCCGTTCCAGAGACGCTTTTGCATCTTTCGAGATCCGCTAC  
KU058657.1 ACAGTACATAGAGGGGCCGTTCCAGAGACGCTTTTGCATCTTTCGAGATCCGCTGC  
KU896946.1 ACAGTACATAGAGGGGCCGTTCCAGAGACGCTTTTGCATCTTTCGAGATCCGCTGC  
MF033144.1 ACAGTACATAGAGGGGCCGTTCCAGAGACGCTTTTGCATCTTTCGAGATCCGCTGC  
MF418030.1 ACAGTACATAGAGGGGCCGTTCCAGAGGACGCTTTTGCATCTTTCGCGATCCACTTC  
MF418031.1 ATGAGTACATAGAGGGGCCGTTCCAGAGGACGCTTTTGCATCTTTCGCGATCCACTTC  
KP089978.1 ATGAGTACATAGAGGGGCCGTTCCAGAGGACGCTTTTGCATCTTTCGAGATCCACTTC  
KU896945.1 ATGAGTACATAGAGGGGCCGTTCCAGAGGACGCTTTTGCATCTTTCGAGATCCACTTC  
LC375228.1 ATGAGTACATAGAGGGGCCGTTCCAGAGGACGCTTTTGCATCTTTCGAGATCCACTTC  
KC430335.1 ATGAGTACATAGAGGGGCCGTTCCAGAGGACGCTTTTGCATCTTTCGAGATCCACTTC  
MF418033.1 ATGAGTACATAGAGGGGCCGTTCCAGAGGACGCTTTTGCATCTTTCGAGATCCACTTC  
MW331321.1 ATGAGTACATAGAGGGGCCGTTCCAGAGGACGCTTTTGCATCTTTCGATCCACTTC  
LC375227.1 ATGAGTACATAGAGGGGCCGTTCCAGAGGACGCTTTTGCATCTTTCGAGATCCACTTC  
MF375506.1 ATGAGTACATAGAGGGGCCGTTCCAGAGGACGCTTTTGCATCTTTCGATCCACTTC  
MK442089.1 ATGAGTACATAGAGGGGCCGTTCCAGAGGAGCCTTTTGCATCTTTCGATCCACTTC  
AJ863510.1 ATGAGTACATAGAGGGGCCATTCCAGAGGACGCTTTTGCATCTTTCGAGATCCGCTTC  
D00461.1 ATGAGTACATAGAGGGGCCATTCCAGAGGACGCTTTTGCATCTTTCGAGATCCGCTTC  
\*\*\*\*\*

MF418029.1 AGAGCACTGCCGTGAGCCCAACAGCGCGCACTTCATCAAAACACTAAGCCATCGCTTTG  
KR152654.1 AGAGCACAGCTGTGAGTCCGCATAGGCGCACTTCATTAAGAGCTAAGCCATCGCTTTG  
MF418035.1 AGAGCACTGCTGTGAGTCCGCACAGCGCGCACTTCATCAAGACACTAAGCCATCGCTTTG  
MF418032.1 AGAGCACTGCCGTAGTCCCATAGAGCGCATTTTCATCAAGACACTAAGTTCATCGCTTTG  
MF496659.1 AAAGTACCGCTGTGAGTCCCATAGAGCGCACTTCATTAAGAACACTAAGCCATCGCTTTG  
MF418028.1 AGAGCACAGCTGTAGCCCATATAGAGCGCATTTTCATCAAAACACTAAGTTCATCGCTTTG  
MH282867.1 AGAGCACAGCTGTAGTCCATATAGAGCGCATTTTCATCAAAACACTAAGTTCATCGCTTTG  
MK563994.1 AGAGCACAGCTGTAGCCCATATAGAGCGCATTTTCATCAAAACACTAAGTTCATCGCTTTG  
JQ647830.1 AGAGCACAGCACTAGTCCCATATAGAGCGCATTTTCATCAAAACACTAAGCCATCGCTTTG  
MN095414.1 AGAGCACAGCTGTAGCCCATATAGAGCGCATTTTCATCAAAACACTAAGCCATCGCTTTG  
KU058657.1 AGAGCACAGCTGTAGCCCATATAGAGCGCATTTTCATCAAAACACTAAGCCATCGCTTTG  
KU896946.1 AGAGCACAGCTGTAGCCCATATAGAGCGCATTTTCATCAAAACACTAAGCCATCGCTTTG  
MF033144.1 AGAGCACAGCTGTAGCCCATATAGAGCGCATTTTCATCAAAACACTAAGCCATCGCTTTG  
MF418030.1 AAAGTACCGCTGTGAGCCCATACCGAGCACTTCATCAAGACACTAAGCCATCGCTTTG  
MF418031.1 AAAGCACCGCTGTGAGCCCATACCGAGCACTTCATCAAGACACTAAGCCATCGCTTTG  
KP089978.1 AGAGTACCGCTGTGAGCCCATACCGAGCACTTCATCAAAACACTAAGCCATCGCTTTG  
KU896945.1 AGAGTACCGCTGTGAGTCCATACCGCGCGCACTTCATCAAAACACTAAGCCATCGCTTTG  
LC375228.1 AGAGTACCGCTGTGAGCCCATACCGCGCGCACTTCATCAAAACACTAAGCCATCGCTTTG  
KC430335.1 AGAGCACCGCTGCGAGCCCATACCGAGCGCACTTCATCAAAACACTAAGCCATCGCTTTG  
MF418033.1 AGAGTACCGCTGTGAGCCCATACCGAGCACTTCATCAAAACACTAAGCCATCGCTTTG  
MW331321.1 AAAGTACCGCTGTGAGCCCATACCGAGCACTTCATCAAAACACTAAGCCATCGCTTTG  
LC375227.1 AGAGTACTGCTGTGAGCCCGTACCGCGCACTTCATCAAAACACTAAGCCATCGCTTTG  
MF375506.1 AGAGTACCGCTGTGAGCCCATACCGCGCACTTCATCAAAACACTAAGCCATCGCTTTG  
MK442089.1 AGAGTACCGCTGTGAGCCCATACCGAGCACTTCATCAAAACACTAAGCCATCGCTTTG  
AJ863510.1 AGAGCACAGCGCTGAGTCCACACAGAGCGCATTTTCATCAAAACACTAAGCCATCGCTTTG  
D00461.1 AGAGCACAGCGCTGAGTCCACACAGAGCGCATTTTCATCAAAACACTAAGCCATCGCTTTG  
\*\*\*\*\*

MF418029.1 GCAAGTGACAGCTGAGCTATTGAGCGATTTGGGTTGGGACGTGCAGGCAGGGTCAAG  
KR152654.1 GCAAGTGTACAGCTGGGTATTGAGGGATTTAGGTTGGGACGTGCAAGCAGAGGGTCAGG  
MF418035.1 GCAAGTGTACAGCTGAGTTATTGAGGGATTTGGGTTGGGACGTGCAGGCAGAGGGTCAGG  
MF418032.1 GTTGAAGTGTACGGCCACTCTTAAGGGATTTGGGTTGGGATGTGCAGGCTGAAGGTCAGG  
MF496659.1 GCAAGTGTACTGCTACTCTTAAGGGATTTGGGTTGGGACGTGCAAGCTGAAGGTCAGG  
MF418028.1 GCAAGTGTACTGCTTCGCTCTTGAGCGATTTGGGTTGGGACGTGCAAGCTGAAGGTCAGG  
MH282867.1 GCAAGTGTACTGCTTCGCTCTTGAGAGATTTGGGTTGGGACGTGCAAGCTGAAGGTCAGG  
MK563994.1 GCAAGTGTACTGCTTCGCTCTTGAGAGATTTGGGTTGGGACGTGCAAGCTGAAGGTCAGG  
JQ647830.1 GCAAGTGTACTGCTTCGCTCTTGAGCGATTTGGGTTGGGACGTGCAAGCTGAAGGTCAGG  
MN095414.1 GCAAGTGTACTGCTTCGCTCTTAAGGGAATTGGGTTGGGACGTGCAAGCTGAGGGTCAGG  
KU058657.1 GCAAGTGTACTGCTTCGCTCTTAAGGGATTTGGGTTGGGACGTGCAAGCTGAAGGTCAGG  
KU896946.1 GCAAGTGTACTGCTTCGCTCTTAAGGGATTTGGGTTGGGACGTGCAAGCTGAGGGTCAGG  
MF033144.1 GCAAGTGTACTGCTTCGCTCTTAAGGGATTTGGGTTGGGACGTGCAAGCTGAGGGTCAGG  
MF418030.1 GCAAGTGTACTGCTTCCTTTTGAGAGATTTGGGTTGGGACGTACAGGCAGAGGTCAGG  
MF418031.1 GCAAGTGTACTGCTTCCTTTTGAGAGATTTGGGTTGGGACGTACAGGCAGAGGTCAGG  
KP089978.1 GCAAGTGTACTGCTTCCTTTTGAGAGATTTGGGTTGGGACGTGCAAGGCAGAGGTCAGG  
KU896945.1 GCAAGTGTACTGCTTCCTTTTGAGAGATTTGGGTTGGGACGTGCAAGGCAGAGGTCAGG  
LC375228.1 GCAAGTGTACTGCTTCCTTTTGAGAGATTTGGGTTGGGACGTGCAAGGCAGAGGTCAGG  
KC430335.1 GCAAGTGTACTGCTTCCTTTTGAGAGATTTGGGTTGGGACGTACAGGCAGAGGTCAGG  
MF418033.1 GCAAGTGTACTGCTTCCTTTTGAGAGATTTGGGTTGGGACGTACAGGCAGAGGTCAGG  
MW331321.1 GCAAGTGTACTGCTTCCTTTTGAGAGATTTGGGTTGGGACGTACAGGCAGAGGTCAGG  
LC375227.1 GCAAGTGTACTGCTTCCTTTTGAGATTTGGGTTGGGACGTACAGGCAGAGGTCAGG  
MF375506.1 GCAAGTGTACTGCTTCCTTTTGAGAGATTTGGGTTGGGACGTACAGGCAGAGGTCAGG  
MK442089.1 GCAAGTGTACTGCTTCCTTTTGAGAGATTTGGGTTGGGACGTACAGGCAGAGGTCAGG  
AJ863510.1 GCAAGTGTACTGATTCACTCTTGAGAGATTTGGGTTGGGACGTGCAAGCTGAAGGTCAGG  
D00461.1 GCAAGTGTACTGATTCACTCTTGAGAGATTTGGGTTGGGACGTGCAAGCTGAAGGTCAGG  
\*\*\*\*\*

MF418029.1 ATTCAAGTTCAGATTGCGATATTTTCACGGTCGATCCTAGGGAGACCATAATCTACTTTG  
KR152654.1 ATTTCAGTTCAGGTTGCGATATCTTCACGGTTGATCCTAGAGAGACCTAGTCTATTTTG  
MF418035.1 ATTTCAGTTCAGGTTGCGATATCTTCACGGTTGATCCTAGAGAGACCTAGTCTATTTTG  
MF418032.1 ATTCAAGTTCAGAAATAGCCGACATTTTCACAGTTGACCCTAGAGAAAGGTTGTCTACTTTG  
MF496659.1 ACTCAGTTCAGAAATTGCTGATATTTTCACAGTTGACCCTAGGGAAACGATTGTCTACTTTG  
MF418028.1 ATTCAAGTTCAGAAATTGCCGATATCTTCACGGTTGACCCTAAGAGAAACAGTTGTCTACTTTG  
MH282867.1 ATTCAAGTTCAGAAATTGCCGATATCTTCACGGTTGACCCTAAGAGAAACAGTTGTTACTTTG  
MK563994.1 ATTCAAGTTCAGAAATTGCCGATATCTTCACGGTTGACCCTAAGAGAAACAGTTGTTACTTTG  
JQ647830.1 ATTCAAGTTCAGAAATTGCCGATATCTTCACGGTTGACCCTAAGAGAAACAGTTGTTACTTTG  
MN095414.1 ATTCAAGTTCAGAAATTGCCGATATCTTCACGGTTGACCCTAAGAGAAACAGTTGTTACTTTG  
KU058657.1 ATTCAAGTTCAGAAATTGCCGATATCTTCACGGTTGACCCTAAGAGAAACAGTTGTTACTTTG  
KU896946.1 ATTCAAGTTCAGAAATTGCCGATATCTTCACGGTTGACCCTAAGAGAAACAGTTGTTACTTTG  
MF033144.1 ATTCAAGTTCAGAAATTGCCGATATCTTCACGGTTGACCCTAAGAGAAACAGTTGTTACTTTG  
MF418030.1 ATTCAAGTTCAGAAATGCCGATATCTTCACAGTTGACCCAGGGATACATTTGTGTACTTCG  
MF418031.1 ATTCAAGTTCAGAAATGCCGATATCTTCACAGTTGACCCTAGGGATACATTTGTGTACTTCG  
KP089978.1 ATTCAAGTTCAGAAATGCCGATATCTTCACAGTTGACCCTAGGGACACTATTGTGTACTTCG  
KU896945.1 ATTCAAGTTCAGAAATGCGATATCTTCACAGTTGACCCTAGGGATACATTTGTGTACTTCG  
LC375228.1 ATTCAAGTTCAGAAATGCGATATCTTCACATTGATCCTAGGAATACATTTGTGTACTTCG  
KC430335.1 ATTCAAGTTCAGAAATGCGATATCTTCACAGTTGACCCTAGGGATACATTTGTGTACTTCG  
MF418033.1 ATTCAAGTTCAGAAATGCGATATCTTCACAGTTGACCCTAGGGATACATTTGTGTACTTCG  
MW331321.1 ATTCAAGTTCAGAAATGCGATATCTTCACAGTTGACCCTAGGGATACATTTGTGTACTTCG  
LC375227.1 ATTCAAGTTCAGAAATGCGATATCTTCACAGTTGACCCTAGGGATACATTTGTGTACTTCG  
MF375506.1 ATTCAAGTTCAGAAATGCGATATCTTCACAGTTGACCCTAGGGATACATTTGTGTACTTCG  
MK442089.1 ATTCAAGTTCAGAAATGCGATATCTTCACAGTTGACCCTAGGGATACATTTGTGTACTTCG  
AJ863510.1 ATTCAAGTTCAGAAATGCGTATATCTTCACGGTGACCCAGAGAAACAAATTGTTACTTTG  
D00461.1 ATTCAAGTTCAGAAATGCGTATATCTTCACGGTGACCCAGAGAAACAAATTGTTACTTTG  
\*\*\*\*\*

MF418029.1 AGCCAGAAAGTTGGAGAGTTGTTGAGGAACACGGCGTTGAGTCGAGCTGCATTGGCGAGG  
KR152654.1 AGCCAGAGGTTGGAGAAATTGTTGAGGAGCCACGGGTTGAGGCGAGCTGCATTGGAGAGG  
MF418035.1 AGCCAGAGGTTGGAGAAATTGTTGAGGAGCCACGGTGTGAGGCAAGCTGCATTGGAGAGG  
MF418032.1 AGCCAGAGGTTGGAGAGTTGCTAAGGAGCCACGGTGTGGAAGCAAGCTGCATTCGGCGAAG  
MF496659.1 AGCCGGAAGTTGGAGAGTTACTGAGGAACACGGTGTGAGGCAAGTTGCATTGGTGAGG  
MF418028.1 AGCCGGAAGTCGAGAGTTGTTGAGGAACACGGGTTGAGGCAAGTTGCATTGGTGAGG  
MH282867.1 AGCCGGAAGTCGAGAGTTGTTGAGGAACACGGGTTGAGGCAAGTTGCATTGGTGAGG  
MK563994.1 AGCCGGAAGTCGAGAGTTGTTGAGGAACACGGGTTGAGGCAAGTTGCATTGGTGAGG  
JQ647830.1 AGCCGGAAGTCGAGAGTTGTTGAGGAATCACGGGTTGAGGCAAGTTGCATTGGTGAGG  
MN095414.1 AGCCGGAAGTCGAGAGTTGCTGAGGAACACGGGTTGAGGCGAGTTGCATTGGTGAGG  
KU058657.1 AGCCGGAAGTCGAGAGTTGTTGAGGAACACGGGTTGAGGCGAATTGCATTGGTGAGG  
KU896946.1 AGCCGGAAGTCGAGAGTTGTTGAGGAACACGGGTTGAGGCGAGTTGCATTGGTGAGG  
MF033144.1 AGCCGGAAGTCGAGAGTTGTTGAGGAACACGGGTTGAGGCGAGTTGCATTGGTGAGG  
MF418030.1 AGCCAGAAAGTTGGAGAGTTACTAAGGAGCCACGGTGTGAGGCGAGCTGCATTGGTGAGG  
MF418031.1 AGCCAGAAAGTTGGAGAGTTACTGAGGAGCCACGGTGTGAGGCGAGCTGCATTGGTGAGG  
KP089978.1 AGCCAGAGCTTGGAGAGTTACTGAGGAGCCACGGTGTGAGGCGAGCTGCATTGGTGAGG  
KU896945.1 AGCCGGAAGTTGGAGAGTTACTGAGGAGCCACGGTGTGAGGCGAAGCTGCATTGGTGAGG  
LC375228.1 AGCCGGAAGTTGGAGAGTTACTGAGGAGCCACGGTGTGAGGCGAGCTGCATTGGTGAGG  
KC430335.1 AACCAAGAGTTGGGAGTTACTGAGGAGCCACGGAGTCGAGGCGAGCTGCATTGGTGAGG  
MF418033.1 AGCCAGAAAGTTGGAGAGTTACTGAGGAGCCACGGTGTGAGGCGAGCTGCATTGGTGAGG  
MW331321.1 AGCCAGAAAGTTGGAGAGTTACTGAGGAGCCACGGTGTGGAAGCGAGCTGCATTGGTGAGG  
LC375227.1 AGCCAGAAAGTTGGAGAGTTACTGAGGAGCCACGGTGTGAGGCGAGCTGCATTGGTGAGG  
MF375506.1 AGCCAGAAAGTTGGAGAAATTACTGAGGAGCCACGGTGTGAGGCGAGTTGCATTGGTGAGG  
MK442089.1 AGCCGGAAGTTGGAGAGTTGCTGAGGAGCCACGGCTCGAGGCGAGCTGCATTGGTGAGG  
AJ863510.1 AGCCGGAAGTTGGTGAGTTGCTGAGGAGTCACGGAGTCGAGGCAAGCTGCATCGGTGAGG  
D00461.1 AGCCGGAAGTTGGTGAGTTGCTGAGGAGTCACGGAGTCGAGGCAAGCTGCATCGGTGAGG  
\*\*\*\*\*

MF418029.1 TGGCGGGGGCTACTTTTGAACACGTAACCTTTGTCACATCTGAGAACAGCCCTCTAATTG  
KR152654.1 TGGCGAGGCGCACTTTTGAACACGTAACATTTGTTACATCTGAGAACAGCCCTCTAATTG  
MF418035.1 TGGCGAGGCGCACTTTTGAACACGTAACATTTGTTACTTCTGAGAACAGCCCTCTAATTG  
MF418032.1 TGGCGGGGGCTACTTTTGAACACGTAACATTCGTCACTTCTGAGAACAGTCTCTAAATTG  
MF496659.1 TGGCTGGAGCTACCTTTGAGCACGTAACATTTGTACATCTGAGAACAGCCCTCTAATTG  
MF418028.1 TGGCGGAGGCTACTTTTGAACACGTAACGTTTCGTCACTTCTGAGAACAGCCCACTAGTTG  
MH282867.1 TGGCGGAGGCTACTTTTGAACACGTAACGTTTCGTCACTTCTGAGAACAGCCCACTAGTTG  
MK563994.1 TGGCGGAGGCTACTTTTGAACACGTCACGTTTCGTCACTTCTGAGAACAGCCCACTAGTTG  
JQ647830.1 TGGCGGAGGCTACCTTTGAGCACGTCACGTTTCGTCACTTCTGAGAACAGCCCACTAGTTG  
MN095414.1 TGGCGGAGGCTACTTTTGAACACGTCACGTTTCGTCACTTCTGAGAACAGCCCACTAGTTG  
KU058657.1 TGGCGGAGGCTACTTTTGAACACGTCACGTTTCGTCACTTCTGAGAACAGCCCACTAGTTG  
KU896946.1 TGGCGGAGGCTACTTTTGAACACGTCACGTTTCGTCACTTCTGAGAACAGCCCACTAGTTG  
MF033144.1 TGGCGGAGGCTACTTTTGAACACGTCACGTTTCGTCACTTCTGAGAACAGCCCACTAGTTG  
MF418030.1 TGGCGGGGGCTACTTTTGAACACGTAACCTTCGTCACTCTGAGAACAGCCCACTGGTTG  
MF418031.1 TGGCGGGGGCTACTTTTGAACACGTCACCTTCGTCACTTCTGAGAACAGCCCACTGGTTG  
KP089978.1 TGGCGGGGGCTACTTTTGAACACGTAACCTTCGTCACTTCTGAGAACAGCCCACTGATTG  
KU896945.1 TGGCGGGGGCTACTTTTGAACACGTCACCTTCGTCACTTCTGAGAACAGCCCACTGGTTG  
LC375228.1 TGGCGGGGGCTACTTTTGAACACGTAACCTTCGTCACTTCTGAGAACAGCCCACTGGTTG  
KC430335.1 TGGCGGGGGCTACTTTTGAACACGTCACCTTCGTCACTTCTGAGAACAGCCCACTGGTTG  
MF418033.1 TGGCGGGGGCTACTTTTGAACACGTCACCTTCGTCACTTCTGAGAACAGCCCACTGGTTG  
MW331321.1 TGGCGGGGGCTACTTTTGAACACGTCACCTTCGTCACTTCTGAGAACAGCCCACTAGTTG  
LC375227.1 TGGCGGGGGCTACTTTTGAACACGTCACCTTCGTCACTTCTGAGAACAGCCCACTGATTG  
MF375506.1 TGGCGGGGGCTACTTTTGAACACGTCACCTTCGTCACTTCTGAGAACAGCCCACTGGTTG  
MK442089.1 TGGCGGGGGCTACTTTTGAACACGTAACCTTCGTCACTTCTGAGAACAGCCCACTGGTTG  
AJ863510.1 TGGCTGGGGCTACTTTTGAACACGTAACGTTTGTCACTCTGAGAAATAGCCCACTGATTG  
D00461.1 TGGCTGGGGCTACTTTTGAACACGTAACGTTTGTCACTCTGAGAAATAGCCCACTGATTG  
\*\*\*\*\*

MF418029.1 ATAAGGCCCGCCGCTTTCAGTGTTTACACGGGCACACTAAGAGTTTGCTAATCTTGTGCC  
KR152654.1 ATAAGGCCCGCCGCTTTCAGTGTTTACCGGGGCACCTCCAAGAGCTGTGCTAATATTGTGCC  
MF418035.1 ATAAGGCCCGCCGCTTTCAGTGTTTACCGGGGCACACTAAGAGCTTGCTAATATTGTGCC  
MF418032.1 ACAGGGCCGCGAGCATTTTCAGTGTTTACTAGGCACACTAAGAGCTTGCTCTACTGTGCC  
MF496659.1 ATAAGGCTGCAGCTTTTCAGTGCTTAACTAGGCACACTAAGAGCTTACTCATATTGTGCC  
MF418028.1 ATAAGGCCCGCCGCTTTCAGTGCTTAACGAGGCACACCAAGAGCTTGCTCATACTGTGCC  
MH282867.1 ATAAGGCCCGCCGCTTTCAGTGCTTAACGAGGCACACCAAGAGCTTGCTCATACTGTGCC  
MK563994.1 ATAAGGCCCGCCGCTTTCAGTGCTTAACGAGGCACACCAAGAGCTTGCTCATACTGTGCC  
JQ647830.1 ATAAGGCCCGCCGCTTTCAGTGCTTAACGAGGCACACCAAGAGCTTGCTCATACTGTGCC  
MN095414.1 ATAAGGCCCGCCGCTTTCAGTGCTTAACGAGGCACACCAAGAGCTTGCTCATACTGTGCC  
KU058657.1 ATAAGGCCCGCCGCTTTCAGTGCTTAACGAGGCACACCAAGAGCTTGCTCATACTGTGCC  
KU896946.1 ATAAGGCCCGCCGCTTTCAGTGCTTAACGAGGCACACCAAGAGCTTGCTCATACTGTGCC  
MF033144.1 ATAAGGCCCGCCGCTTTCAGTGCTTAACGAGGCACACCAAGAGCTTGCTCATACTGTGCC  
MF418030.1 ATAAGGCCCGCCGCTTTCAGTGCTTAACGAGGCACACTAAGAGCTTGCTCATATTGTGCC  
MF418031.1 ATAAGGCCCGCCGCTTTCAGTGCTTAACGAGGCACACTAAGAGCTTGCTCATATTATGACC  
KP089978.1 ATAAGGCAGCGCTTTCAGTGCTTACGAGGCACACTAAGAGCTTGCTCATATTGTGCC  
KU896945.1 ATAAGGCCCGCCGCTTTCAGTGCTTACGAGGCACACCAAGAGCTTGCTCATATTGTGCC  
LC375228.1 ATAAGGCCCGCCGCTTTCAGTGCTTACGAGGCACACCAAGAGCTTGCTCATATTGTGCC  
KC430335.1 ATAAGGCTGCAGCTTTTCAATGCTTAAACGAGGCACACTAAGAGCTTGCTCATATTGTGCC  
MF418033.1 ATAAGGCCCGCCGCTTTCAGTGCTTAAACGAGGCACACTAAGAGCTTGCTCATATTGTGCC  
MW331321.1 ATAAGGCCCGCCGCTTTCAGTGCTTACGAGGCACACTAAGAGCTTGCTCATATTGTGCC  
LC375227.1 ATAAGGCCCGCCGCTTTCAGTGCTTAAACGAGGCACACTAAGAGCTTGCTCATCTTGTGCC  
MF375506.1 ATAAGGCCCGCCGCTTTCAGTGCTTACGAGGCACACTAAGAGCTTGCTCATATTGTGCC  
MK442089.1 ATAAGGCCCGCCGCTTTCAGTGCTTACGAGGCACACTAAGAGCTTGCTCATATTGTGCC  
AJ863510.1 ATAAGGCCCTGCATTTTCAGTGCTTAAACGAGGCACACCAAGAGCTTACTCATATTGTGCC  
D00461.1 ATAAGGCCCTGCATTTTCAGTGCTTAAACGAGGCACACCAAGAGCTTACTCATATTGTGCC  
\*\*\*\*\*

CTGATGCCACTTACACGCGCGCTAACTACACAGGGTTATACATTGCGAGCGGCTTTGGGA  
CTGATGCCACTTACACGCGCGCTAATTACACAGGGTTATACATTGCGGAGCGCTTGGT  
CTGATGCCACTTACACGCGCGCTAATTACACAGGGTTATACATTGCGGAGCGCTTGGT  
\* \* \* \* \* \* \* \* \* \* \* \* \* \* \* \* \* \* \* \* \* \* \* \* \* \* \* \*

## MF4180

TGAAGCACCTTTAGGTTACAGGTAAGAGTTCGAAGAACTGTCCCACAGAGAAATGCC  
TGAACACCTTTAGGTTACAGGTAAGAGCTCGAATATACAGTCTCACAGCAAGA**ATGCC**  
TGAACACCTTTAGGTTACAGGTAAGAGCTCGAATATACAGTCTCACAGCAAGAATGCC  
\* \* \* \* \*

[illegible]

\*\*\* \*\*

[illegible]

\*\*\* \*\*

MF418029.1 GATGAGGAGGAA<sup>CC</sup>CAGAGA<sup>ACC</sup>CATACTCGCGATTTTCAATCGA<sup>G</sup>GAGTTGTTCAAGAT  
KR152654.1 GATGAGGAGGAA<sup>CC</sup>CAGAGA<sup>ACC</sup>CATACTCGCGATTTTCAATCGATGAGTTGTTCAAGAT  
MF418035.1 GATGAGGAGGAA<sup>CC</sup>CAGAGA<sup>ACC</sup>CATACTC<sup>AC</sup>GATTTTCAATCGATGAGTTGTTCAAGAT  
MF418032.1 GATGAGGAGGAATCCGGAA<sup>AA</sup>CCCTACTC<sup>AC</sup>GATTCTCGATCGATGAGCTGTTCAA<sup>AA</sup>T  
MF496659.1 GATGAGGAGGAA<sup>CC</sup>CGGAGA<sup>ACC</sup>CATACTCGCGATTTTC<sup>AT</sup>CGA<sup>CG</sup>GAGTTGTTCAAGAT  
MF418028.1 GATGAGGAGGAATCCGGAA<sup>AA</sup>CCATACTCTCGATTCTCAATTGACGAGCTGTTCAA<sup>AA</sup>T  
MH282867.1 GATGAGAAGGAATCCGGAA<sup>AA</sup>CCATACTCTCGATTCTCAATTGACGAGCTGTTCAA<sup>AA</sup>T  
MK563994.1 GATGAGAAGGAATCCGGAA<sup>AA</sup>CCATACTCTCGATTCTCAATTGACGAGCTGTTCAA<sup>AA</sup>T  
JQ647830.1 GATGAGAAGGAATCCGGAA<sup>AA</sup>ACCATACTCTCGATTCTTCAATCGACGAGCTGTTCAA<sup>AA</sup>T  
MN095414.1 GATGAGAAGGAATCCGGAA<sup>AA</sup>CCATACTCTCGATTCTCAATTGACGAGCTGTTCAA<sup>AA</sup>T  
KU058657.1 GATGAGAAGGAATCCGGAA<sup>AA</sup>CCATACTCTCGATTCTCAATTGACGAGCTGTTCAA<sup>AA</sup>T  
KU896946.1 GATGAGAAGGAATCCGGAA<sup>AA</sup>CCATACTCTCGATTCTCAATTGACGAGCTGTTCAA<sup>AA</sup>T  
MF033144.1 GATGAGAAGGAATCCGGAA<sup>AA</sup>CCATACTCTCGATTCTCAATTGACGAGCTGTTCAA<sup>AA</sup>T  
MF418030.1 <sup>AT</sup>GC<sup>CG</sup>GAGGAATCCGGAGA<sup>ACC</sup>CTACTCGCGATTTTCAATCGATGAGCTGTTCAA<sup>AA</sup>T  
MF418031.1 <sup>AT</sup>GC<sup>CG</sup>GAGGAATCCGGAGA<sup>ACC</sup>CTACTCGCG<sup>TT</sup>TTTCAATCGATGAGCTGTTCAA<sup>AA</sup>T  
KP089978.1 <sup>AT</sup>GC<sup>CG</sup>GAGGAATCCGGAGA<sup>AA</sup>CCATACTCGCG<sup>TT</sup>TTTCAATCGATGAGCTGTTCAA<sup>AA</sup>T  
KU896945.1 <sup>AT</sup>GC<sup>CG</sup>GAGGAATCCGGAGA<sup>ACC</sup>CATACTCGCG<sup>TT</sup>TTTCAAT<sup>AG</sup>ATGAGCTGTTCAA<sup>AA</sup>T  
LC375228.1 <sup>AT</sup>GC<sup>CG</sup>GAGGAATCCGGAGA<sup>ACC</sup>CATACTCGCG<sup>TT</sup>TTTCAAT<sup>AG</sup>ATGAGCTGTTCAA<sup>AA</sup>T  
KC430335.1 <sup>AT</sup>GC<sup>CG</sup>GAGGAATCCGGAGA<sup>ACC</sup>CATACTCGCG<sup>TT</sup>TTTCAATCGATGAGCTGTT<sup>TA</sup>AGAT  
MF418033.1 <sup>AT</sup>GC<sup>CG</sup>GAGGAATCC<sup>AG</sup>AGA<sup>ACC</sup>CATACTCGCG<sup>TT</sup>TTTCAATCGATGAGCTGTTCAA<sup>AA</sup>T  
MW331321.1 <sup>AT</sup>GC<sup>CG</sup>GAGGAATCCGGAGA<sup>ACC</sup>CATACTCGCG<sup>TT</sup>TTTCAATCGA<sup>G</sup>GAGCTGTTCAA<sup>AA</sup>T  
LC375227.1 <sup>AT</sup>GC<sup>CG</sup>GAGGAATCCGGAGA<sup>ACC</sup>CATACTCGCG<sup>TT</sup>TTTCAAT<sup>AG</sup>ATGAGCTGTTCAA<sup>AA</sup>T  
MF375506.1 <sup>AT</sup>GC<sup>CG</sup>GAGGAATCCGGAGA<sup>ACC</sup>CATACTCGCG<sup>TT</sup>TTTCAATCGATGAGCTGTTCAA<sup>AA</sup>T  
MK442089.1 <sup>AT</sup>GC<sup>CG</sup>GAGGAATCCGGAGA<sup>AA</sup>CCATACTCGCG<sup>TT</sup>TTTCAATCGATGAGCTGTTCAA<sup>AA</sup>T  
AJ863510.1 GATGAGGAGGAATCCGGAA<sup>AA</sup>CCGTACTCTCGTTCTCAATCGA<sup>G</sup>GAGCTGTTCAAAGAT  
D00461.1 GATGAGGAGGAATCCGGAA<sup>AA</sup>CCGTACTCTCGTTCTCAATCGA<sup>G</sup>GAGCTGTTCAAAGAT  
\*\*\*<sup>AT</sup>GC<sup>CG</sup>GAGGAATCCGGAGA<sup>AA</sup>CCATACTCGCG<sup>TT</sup>TTTCAATCGATGAGCTGTTCAA<sup>AA</sup>T\*\*\*

MF418029.1 GGAAAT<sup>TC</sup>GGT<sup>TC</sup>AGTGTCCAAT<sup>TA</sup>ATATGGCGAA<sup>TA</sup>CTGAGCAG<sup>AT</sup>GGC<sup>TA</sup>CAAT<sup>TA</sup>CTGC  
KR152654.1 GGA<sup>TA</sup>TC<sup>CG</sup>GT<sup>TC</sup>AGTGTCCAAT<sup>TA</sup>ACATGGC<sup>AA</sup>TA<sup>TA</sup>CTGAGCAG<sup>AT</sup>GGC<sup>TA</sup>CA<sup>TA</sup>CTGC  
MF418035.1 GGA<sup>TA</sup>TC<sup>CG</sup>GT<sup>TC</sup>AGTGTCCAAT<sup>TA</sup>ACATGGC<sup>AA</sup>TA<sup>TA</sup>CTGAGCAG<sup>AT</sup>GGC<sup>TA</sup>CAAT<sup>TA</sup>CTGC  
MF418032.1 GGAAAT<sup>TC</sup>CGGT<sup>TC</sup>AGTGTCCAAC<sup>AA</sup>CAATGGCGAA<sup>TA</sup>CTGAGCAG<sup>AT</sup>GGC<sup>TA</sup>CA<sup>TA</sup>CTGC  
MF496659.1 GGATAT<sup>TC</sup>CGAT<sup>TC</sup>GGTGTCCAAT<sup>TA</sup>ACATGGCGAA<sup>CT</sup>GAGCAAA<sup>AT</sup>GGC<sup>TA</sup>CA<sup>TA</sup>CTGC  
MF418028.1 GGAAAT<sup>TC</sup>CGGT<sup>TC</sup>AGTGTCCAAC<sup>AA</sup>CAATGGC<sup>AA</sup>CA<sup>TA</sup>CTGAGCAG<sup>AT</sup>GGC<sup>TA</sup>CA<sup>TA</sup>CTGC  
MH282867.1 GGAAAT<sup>TC</sup>CGGT<sup>TC</sup>AGTGTCCAAC<sup>AA</sup>CAATGGC<sup>AA</sup>CA<sup>TA</sup>CTGAGCAG<sup>AT</sup>GGC<sup>TA</sup>CA<sup>TA</sup>CTGC  
MK563994.1 GGAAAT<sup>TC</sup>CGGT<sup>TC</sup>AGTGTCCAAC<sup>AA</sup>CAATGGC<sup>AA</sup>CA<sup>TA</sup>CTGAGCAG<sup>AT</sup>GGC<sup>TA</sup>CA<sup>TA</sup>CTGC  
JQ647830.1 GGAAAT<sup>TC</sup>CGGT<sup>TC</sup>AGTGTCCAAC<sup>AA</sup>CAATGGC<sup>AA</sup>CA<sup>TA</sup>CTGAGCAG<sup>AT</sup>GGC<sup>TA</sup>CA<sup>TA</sup>CTGC  
MN095414.1 GGAAAT<sup>TC</sup>CGGT<sup>TC</sup>AGTGTCCAAC<sup>AA</sup>CAATGGC<sup>AA</sup>CA<sup>TA</sup>CTGAGCAG<sup>AT</sup>GGC<sup>TA</sup>CA<sup>TA</sup>CTGC  
KU058657.1 GGAAAT<sup>TC</sup>CGGT<sup>TC</sup>AGTGTCCAAC<sup>AA</sup>CAATGGC<sup>AA</sup>CA<sup>TA</sup>CTGAGCAG<sup>AT</sup>GGC<sup>TA</sup>CA<sup>TA</sup>CTGC  
KU896946.1 GGAAAT<sup>TC</sup>CGGT<sup>TC</sup>AGTGTCCAAC<sup>AA</sup>CAATGGC<sup>AA</sup>CA<sup>TA</sup>CTGAGCAG<sup>AT</sup>GGC<sup>TA</sup>CA<sup>TA</sup>CTGC  
MF033144.1 GGAAAT<sup>TC</sup>CGGT<sup>TC</sup>AGTGTCCAAC<sup>AA</sup>CAATGGC<sup>AA</sup>CA<sup>TA</sup>CTGAGCAG<sup>AT</sup>GGC<sup>TA</sup>CA<sup>TA</sup>CTGC  
MF418030.1 GGAAAT<sup>TC</sup>CGAT<sup>TC</sup>GGTGTCCAAC<sup>AA</sup>CAATGGCGAA<sup>CA</sup>CTGAGCAAA<sup>AT</sup>GGC<sup>TA</sup>CA<sup>TA</sup>CTGC  
MF418031.1 GGAAAT<sup>TC</sup>CGAT<sup>TC</sup>GGTGTCCAAC<sup>AA</sup>CAATGGCGAA<sup>CA</sup>CTGAGCAAA<sup>AT</sup>GGC<sup>TA</sup>CA<sup>TA</sup>CTGC  
KP089978.1 GGAAAT<sup>TC</sup>CGGT<sup>TC</sup>AGTGTCCAAC<sup>AA</sup>CAATGGCGAA<sup>CA</sup>CTGAGCAAA<sup>AT</sup>GGC<sup>TA</sup>CA<sup>TA</sup>CTGC  
KU896945.1 GGAAAT<sup>TC</sup>CGAT<sup>TC</sup>GGTGTCCAAC<sup>AA</sup>CAATGGCGAA<sup>CA</sup>CTGAGCAAA<sup>AT</sup>GGC<sup>TA</sup>CA<sup>TA</sup>CTGC  
LC375228.1 GGAAAT<sup>TC</sup>CGAT<sup>TC</sup>GGTGTCCAAC<sup>AA</sup>CAATGGCGAA<sup>CA</sup>CTGAGCAAA<sup>AT</sup>GGC<sup>TA</sup>CA<sup>TA</sup>CTGC  
KC430335.1 GGAAAT<sup>TC</sup>CGAT<sup>TC</sup>GGTGTCCAAC<sup>AA</sup>CAATGGCGAA<sup>CA</sup>CTGAGCAAA<sup>AT</sup>GGC<sup>TA</sup>CA<sup>TA</sup>CTGC  
MF418033.1 GGAAAT<sup>TC</sup>CGAT<sup>TC</sup>GGTGTCCAAC<sup>AA</sup>CAATGGCGAA<sup>CA</sup>CTGAGCAAA<sup>AT</sup>GGC<sup>TA</sup>CA<sup>TA</sup>CTGC  
MW331321.1 GGAAAT<sup>TC</sup>CGAT<sup>TC</sup>GGTGTCCAAC<sup>AA</sup>CAATGGCGAA<sup>CA</sup>CTGAGCAAA<sup>AT</sup>GGC<sup>TA</sup>CA<sup>TA</sup>CTGC  
LC375227.1 GGAAAT<sup>TC</sup>CGAT<sup>TC</sup>GGTGTCCAAC<sup>AA</sup>CAATGGCGAA<sup>CA</sup>CTGAGCAAA<sup>AT</sup>GGC<sup>TA</sup>CA<sup>TA</sup>CTGC  
MF375506.1 GGAAAT<sup>TC</sup>CGAT<sup>TC</sup>GGTGTCCAAC<sup>AA</sup>CAATGGCGAA<sup>CA</sup>CTGAGCAAA<sup>AT</sup>GGC<sup>TA</sup>CA<sup>TA</sup>CTGC  
MK442089.1 <sup>GG</sup>AAAT<sup>TC</sup>CGAT<sup>TC</sup>GGTGTCCAAC<sup>AA</sup>CAATGGCGAA<sup>CA</sup>CTGAGCAAA<sup>AT</sup>GGC<sup>TA</sup>CA<sup>TA</sup>CTGC  
AJ863510.1 GGAAAT<sup>TC</sup>CGAT<sup>TC</sup>GGTGTCCAAC<sup>AA</sup>CAATGGCGAA<sup>CA</sup>CTGAGCAAA<sup>AT</sup>GGC<sup>TA</sup>CA<sup>TA</sup>CTGC  
D00461.1 GGAAAT<sup>TC</sup>CGAT<sup>TC</sup>GGTGTCCAAC<sup>AA</sup>CAATGGCGAA<sup>CA</sup>CTGAGCAAA<sup>AT</sup>GGC<sup>TA</sup>CA<sup>TA</sup>CTGC  
\*\*\*\*\*

MF418029.1 TGA<sup>CA</sup>T<sup>T</sup>GC<sup>CG</sup>GACTTGGCGT<sup>TC</sup>CCACTGAGCA<sup>TA</sup>TTGCT<sup>TC</sup>GGAGTTACTGAAGGT<sup>AG</sup>T  
KR152654.1 TGACAT<sup>T</sup>GCAGGACTTGGGT<sup>TC</sup>CCCT<sup>TA</sup>CTGAGCATGTTGCT<sup>TC</sup>GGAGTCATACTGAAGGT<sup>GG</sup>T  
MF418035.1 TGA<sup>CA</sup>T<sup>T</sup>GCAGGACTTGGAGT<sup>TC</sup>CT<sup>TA</sup>CA<sup>TA</sup>GAGCATGTTGCC<sup>TC</sup>GGAGTCATA<sup>TA</sup>TGAAGGT<sup>GG</sup>T  
MF418032.1 <sup>AG</sup>ATAT<sup>TC</sup>GCAGGGCT<sup>TC</sup>GGTGT<sup>TC</sup>CCACTGAGCATGTTGCAGGAGTCATACTGAAGGT<sup>GG</sup>T  
MF496659.1 GGATAT<sup>TC</sup>CGTGGT<sup>TC</sup>TCGGTGT<sup>TC</sup>CCAC<sup>TC</sup>GAGCATGTTGCAGGAGTCATA<sup>TA</sup>TGAAGGT<sup>AG</sup>T  
MF418028.1 AGATAT<sup>T</sup>GCCGGGCTCGGTGT<sup>TC</sup>CCACTGAGCATGTTGCT<sup>TC</sup>GGCGTCATACTGAAGGT<sup>CG</sup>T  
MH282867.1 AGATAT<sup>T</sup>GCTGGGCTCGGTGT<sup>TC</sup>CCCACTGAGCATGTTGCT<sup>TC</sup>GGCGTCATACTGAAGGT<sup>CG</sup>T  
MK563994.1 <sup>AG</sup>CA<sup>TA</sup>T<sup>T</sup>GCTGGGCTCGGTGT<sup>TC</sup>CCACTGAGCATGTTGCT<sup>TC</sup>GGCGTCATACTGAAGGT<sup>CG</sup>T  
JQ647830.1 AGATAT<sup>T</sup>GCCGGGCTCGGTGT<sup>TC</sup>CCACTGAGCATGTTGCT<sup>TC</sup>GGCGTCATACTGAAGGT<sup>CG</sup>T  
MN095414.1 AGATAT<sup>T</sup>GCCGGGCTCGGTGT<sup>TC</sup>CCACTGAGCATGTTGCT<sup>TC</sup>GGCGTCATACTGAAGGT<sup>CG</sup>T  
KU058657.1 AGATAT<sup>T</sup>GCCGGGCTCGGTGT<sup>TC</sup>CCACTGAGCATGTTGCT<sup>TC</sup>GGCGTCATACTGAAGGT<sup>CG</sup>T  
KU896946.1 AGATAT<sup>T</sup>GCCGGGCTCGGTGT<sup>TC</sup>CCACTGAGCATGTTGCT<sup>TC</sup>GGCGTCATACTGAAGGT<sup>CG</sup>T  
MF033144.1 AGATAT<sup>T</sup>GCCGGGCTCGGTGT<sup>TC</sup>CCACTGAGCAT<sup>TA</sup>TTGCT<sup>TC</sup>GGCGTCATACTGAAGGT<sup>CG</sup>T  
MF418030.1 TGA<sup>CA</sup>T<sup>T</sup>CGCTGGACTTGGG<sup>TC</sup>GTCCCACTGA<sup>TA</sup>CA<sup>TA</sup>GTTGCAGGTGTCATACTGA<sup>AA</sup>GTGGT  
MF418031.1 GGACAT<sup>TC</sup>CGTGGACTTGGG<sup>TC</sup>GTCCCACTGA<sup>TA</sup>CA<sup>TA</sup>GTTGCAGGTGTCATACTGA<sup>AA</sup>GTGGT  
KP089978.1 TGA<sup>CA</sup>T<sup>TC</sup>CGTGGACTTGGG<sup>TC</sup>GTCCCACTGA<sup>TA</sup>CA<sup>TA</sup>GTTGCAGG<sup>TC</sup>GTATACTGA<sup>AA</sup>GTGGT  
KU896945.1 TGACAT<sup>TC</sup>CGTGGACTTGGG<sup>TC</sup>GTCCCACTGA<sup>TA</sup>CA<sup>TA</sup>TGTTGCAGG<sup>TC</sup>GTATACTGA<sup>AA</sup>GTGGT  
LC375228.1 TGACAT<sup>TC</sup>CGTGGACTTGGG<sup>TC</sup>GTCCCACTGA<sup>TA</sup>CA<sup>TA</sup>TGTTGCAGG<sup>TC</sup>GTATACTGA<sup>AA</sup>GTGGT  
KC430335.1 TGACAT<sup>TC</sup>CGTGGACTTGGG<sup>TC</sup>GTCCCACTGA<sup>TA</sup>CA<sup>TA</sup>GTTGCAGG<sup>TC</sup>GTATACTGA<sup>AA</sup>GTGGT  
MF418033.1 TGACAT<sup>TC</sup>CGTGGACTTGGG<sup>TC</sup>GTCCCACTGA<sup>TA</sup>CA<sup>TA</sup>GTTGCAGG<sup>TC</sup>GTATACTGA<sup>AA</sup>GTGGT  
MW331321.1 TGACAT<sup>TC</sup>CGTGGGCTTGGG<sup>TC</sup>GTCCCACTGA<sup>TA</sup>CA<sup>TA</sup>TGTTGCAGGAGTTACTGA<sup>AA</sup>GTGGT  
LC375227.1 TGACAT<sup>TC</sup>CGTGGACTTGGG<sup>TC</sup>GTCCCACTGA<sup>TA</sup>CA<sup>TA</sup>TGTTGCAGG<sup>TC</sup>GTATACTGA<sup>AA</sup>GTGGT  
MF375506.1 TGACAT<sup>TC</sup>CGTGGACTTGGG<sup>TC</sup>GTCCCACTGA<sup>TA</sup>CA<sup>TA</sup>GTTGCAGG<sup>TC</sup>GTATACTGA<sup>AA</sup>GTG<sup>T</sup>T  
MK442089.1 <sup>TG</sup>ATAT<sup>TC</sup>CGTGGGCT<sup>TC</sup>GGG<sup>TC</sup>GTCCCACTGA<sup>TA</sup>CA<sup>TA</sup>GTTGCAGG<sup>TC</sup>GTATACTGA<sup>AA</sup>GTGGT  
AJ863510.1 <sup>GG</sup>ATAT<sup>T</sup>GCAGGGCT<sup>TC</sup>GGCGTCCCA<sup>TA</sup>CAGCATGTGCG<sup>TC</sup>GGG<sup>TC</sup>TTATACTGAAGGT<sup>CG</sup>T  
D00461.1 <sup>GG</sup>ATAT<sup>T</sup>GCAGGGCT<sup>TC</sup>GGCGTCCCA<sup>TA</sup>CAGCATGTGCG<sup>TC</sup>GGG<sup>TC</sup>TTATACTGAAGGT<sup>CG</sup>T  
\*\*\*\*\*

MF418029.1 GATCATGTGTGCAAGCGTGAGCAGTTCTGTGTATCTGGATCCAGCTGGAAACGTTGAATT  
KR152654.1 GATTATGTGTGCTAGCGTGAGCAGCTCGGTGTATCTGGATCCAGCTGGAAACGTTGAATT  
MF418035.1 GATTATGTGTGCAAGCGTGAGCAGCTCGGTGTATCTGGATCCAGCTGGAAACGTTGAGTT  
MF418032.1 GATCATGTGCGCGAGTGTGAGTAGCTCTGTCTACCTAGACCCCTGCTGGAACTGTTGAGTT  
MF496659.1 GATAATGTGCGCAAGTGTGAGCAGTTCTGTCTACTTTGGATCCCGCAGGAACGTTGAGTT  
MF418028.1 GATCATGTGCGCGAGCGTGAGCAGTTCTGTCTACTAGACCCCTGCAGGAACGTTGAGTT  
MH282867.1 GATTATGTGTGCGAGCGTGAGCAGTTCTGTCTACTAGACCCCTGCAGGAACGTTGAGTT  
MK563994.1 GATTATGTGTGCGAGCGTGAGCAGTTCTGTCTACTAGACCCCTGCAGGAACGTTGAGTT  
JQ647830.1 AATCATGTGCGCAAGCGTGAGTAGTTCTGTCTACTAGACCCCTGCAGGAACGTTGAGTT  
MN095414.1 GATCATGTGCGCAAGCGTAAGCAGTTCTGTCTACTAGACCCCTGCAGGAACGTTGAGTT  
KU058657.1 GATCATGTGCGCAAGCGTGAGCAGTTCTGTCTACTAGACCCCTGCAGGGACTGTTGAATT  
KU896946.1 GATCATGTGCGCAAGCGTGAGCAGTTCTGTCTACTAGACCCCTGCAGGGACTGTTGAGTT  
MF033144.1 GATCATGTGCGCAAGCGTGAGCAGTTCTGTCTACTAGACCCCTGCAGGAACGTTGAGTT  
MF418030.1 GATCATGTGTGCAAGCGTGAGTAGCTCTGTCTATCTAGATCCAGCAGGGACTGTGAGTT  
MF418031.1 GATCATGTGTGCAAGCGTGAGTAGCTCTGTCTATCTAGATCCAGCAGGGACTGTGAGTT  
KP089978.1 GATCATGTGTGCAAGCGTGAGTAGCTCTGTCTATCTAGATCCAGCGGGACTGTAGAGTT  
KU896945.1 GATCATGTGTGCAAGCGTGAGTAGCTCAGTTATCTAGATCCAGCAGGGACTGTGAGTT  
LC375228.1 GATCATGTGTGCAAGCGTGAGTAGTTCAGTTATCTAGATCCAGCAGGGACTGTGAGTT  
KC430335.1 GATCATGTGTGCAAGCGTGAGTAGCTCTGTCTATCTAGGAACCCGGCAGGGACTGTGAGTT  
MF418033.1 GATCATGTGTGCAAGCGTGAGTAGCTCTGTCTATCTAGACCCGGCAGGGACTGTGAGTT  
MW331321.1 GATCATGTGTGCAAGTGTGAGTAGCTCTGTCTATCTAGATCCAGCAGGGACTGTGAGTT  
LC375227.1 GATCATGTGTGCAAGCGTGAGTAGTTCAGTTATCTAGATCCAGCAGGGACTGTGAGTT  
MF375506.1 GATCATGTGTGCAAGTGTGAGTAGCTCTGTCTATCTAGATCCAGCTGGGACTGTGAGTT  
MK442089.1 GATCATGTGTGCAAGCGTGAGTAGCTCTGTCTATCTAGATCCAGCAGGGACTGTGAGTT  
AJ863510.1 AATTATGTGCGCAAGCGTGAGCAGTTCTGTCTACTAGACCCCTGCAGGGACTGTTGAGTT  
D00461.1 AATTATGTGCGCAAGCGTGAGCAGTTCTGTCTACTAGACCCCTGCAGGGACTGTTGAGTT  
\*\*\*\*\*

MF418029.1 CCCCCTGGTGCAGTTCCCTTAGATTCCATCATCGCAATCATGAAAATCGCGCGGGGCT  
KR152654.1 TCCCCTGGTGCAGTTCCCTTGGATTCCATCATTTGCAATCATGAAAATCGCGCGGGGCT  
MF418035.1 CCCCCTGGTGCAGTTCCCTTAGATTCCATCATTTGCTATCATGAAAATCGCGCGGGGCT  
MF418032.1 CCCCCTGGGCGGTTCCCTTGGATTCTAATATTGCCATATGAAAATCGAGCAGGGTT  
MF496659.1 CTCTCTCTGGGCGAGTCCCTTGGATTCCATATTGCCATCATGAAGAATCGCGCAGGGTT  
MF418028.1 CCCCCTGGAGCAGTCCCTTGGATTCCATATTGCAATCATGAAAATCGTGTGGACT  
MH282867.1 CCCCCTGGGCGAGTCCCTTGGATTCCATATTGCAATCATGAAAATCGTGTGGACT  
MK563994.1 CTCCACTGGGCGAGTCCCTTGGATTCCATATTGCAATCATGAAAATCGTGTGGACT  
JQ647830.1 CCCCCTGGAGCAGTCCCTTGGATTCCATATTGCAATCATGAAAATCGTGTGGACT  
MN095414.1 CCCCCTGGAGCAGTCCCTTGGACTCCATATTGCAATCATGAAAATCGTGTGGACT  
KU058657.1 CCCCCTGGGCGAGTCCCTTGGACTCCATATTGCAATCATGAAAATCGTGTGGACT  
KU896946.1 CCCCCTGGAGCGGTTCCCTTGGACTCCATATTGCAATCATGAAAATCGTGTGGACT  
MF033144.1 CCCCCTGGGCGAGTCCCTTGGACTCCATATTGCAATCATGAAAATCGTGTGGACT  
MF418030.1 CCCCACGGGCGAGTGCCTTGGACTCGATCATTGCAATCATGAAGAATCGCGCGGGATT  
MF418031.1 CCCCACGGGCGAGTGCCTTGGACTCGATCATTGCAATCATGAAGAATCGCGCGGGATT  
KP089978.1 CCCCACGGGCGAGTGCCTTGGACTCGATCATTGCAATCATGAAGAATCGCGCGGGTTT  
KU896945.1 CCCCACGGGCGAGTGCCTTGGACTCGATCATTGCAATCATGAAGAATCGCGCGGGATT  
LC375228.1 CCCCACGGGCGAGTGCCTTGGACTCGATCATTGCAATCATGAAGAATCGCGCGGGATT  
KC430335.1 CCCCACGGGCGAGTGCCTTGGACTCGATCATTGCAATCATGAAGAATCGCGCAGGATT  
MF418033.1 CTCCACGGGCGAGTGCCTTGGACTCGATCATTGCAATCATGAAGAATCGCGCGGGATT  
MW331321.1 CCCCACGGGCGAGTGCCTTAGACTCGATCATTGCAATCATGAAGAATCGCGCGGGATT  
LC375227.1 CCCCACGGGCGAGTGCCTTGGACTCGATCATTGCAATCATGAAGAATCGCGCGGGATT  
MF375506.1 CCCCACGGGCGAGTGCCTTGGACTCGATCATTGCAATCATGAAGAATCGCGCGGGATT  
MK442089.1 CCCCACGGGCGAGTGCCTTGGACTCAGTCCATCATTGCAATCATGAAGAATCGCGCGGGATT  
AJ863510.1 CCTACTGGGCGAGTGCCTAGTGGATTCCATATTGCAATCATGAAAACCGTGTGGGTT  
D00461.1 CCTACTGGGCGAGTGCCTAGTGGATTCCATATTGCAATCATGAAAACCGTGTGGGTT  
\*\*\*

MF418029.1 GAGGAAGGTGTGTAGGTTATATGCTCCAGTCGTTTGAATTACATGCTCGTACAGAACAG  
KR152654.1 AAGGAAGGTGTGTAGGTTGTATGCTCCAGTCGTCGGAATTACATGCTCGTCAAAATAG  
MF418035.1 AAGGAAGGTGTGTAGGTTGTATGCTCCAGTCGTCGGAATTACATGCTCGTCAAAATAG  
MF418032.1 GAGGAAGGTGTGTAGGTTGTATGCTCCAGTTGTTTGGAACTACATGCTTGTTCAGAACAG  
MF496659.1 GAGGAAGGTGTGTAGGTTGTATGCTCCAGTTGTTTGGAACTATATGCTTGTTCAGAAATAG  
MF418028.1 GAGGAAGGTGTGCAGGCTGTATGCTCCGTCGCTCTGGAATTACATGCTCGTTCAGAACAG  
MH282867.1 GAGGAAGGTGTGCAGGCTGTATGCTCCGTCGCTCTGGAATTACATGCTCGTTCAGAACAG  
MK563994.1 GAGGAAGGTGTGCAGGCTGTATGCTCCGTCGCTCTGGAATTACATGCTCGTTACAGAACAG  
JQ647830.1 GAGGAAGGTGCGCAGGCTGTATGCCCGGTCGCTCTGGAATTACATGCTCGTTACAGAACAG  
MN095414.1 GAGGAAGGTGTGCAGGCTGTATGCCCGGTCGCTCTGGAATTACATGCTCGTTACAGAACAG  
KU058657.1 GAGGAAGGTGTGCAGGCTGTATGCCCGGTCGCTCTGGAATTACATGCTCGTTACAGAACAG  
KU896946.1 GAGGAAGGTGTGCAGGCTGTATGCCCGGTCGCTCTGGAATTACATGCTCGTTACAGAACAG  
MF033144.1 GAGGAAGGTGTGCAGGCTGTATGCCCGGTCGCTCTGGAATTACATGCTCGTTACAGAACAG  
MF418030.1 GAGGAAGGTGTGCAGGCTGTATGCTCCAGTCGTTGGAATTACATGCTAGTTCAGAAATAG  
MF418031.1 GAGGAAGGTGTGCAGGCTGTATGCTCCAGTTGTTTGGAAATTACATGCTAGTTCAGAAATAG  
KP089978.1 GAGGAAGGTGTGCAGGCTGTATGCTCCAGTTGTTTGGAAATTACATGCTAGTTCAGAAATAG  
KU896945.1 GAGGAAGGTGTGCAGGCTGTATGCTCCAGTCGTTGGAATTACATGCTAGTTCAGAAATAG  
LC375228.1 GAGGAAGGTGTGCAGGCTGTATGCTCCAGTTGTTTGGAAATTACATGCTAGTTCAGAAATAG  
KC430335.1 GAGGAAGGTGTGCAGGCTGTATGCTCCAGTCGTTGGAATTACATGCTAGTTCAGAAATAG  
MF418033.1 GAGGAAGGTGTGCAGGTTGTACGCTCCAGTCGTTGGAATTACATGCTAGTTCAGAAATAG  
MW331321.1 GAGGAAGGTGTGCAGGCTGTATGCCCGAGTCGTTGGAATTACATGCTAGTTCAGAAATAG  
LC375227.1 GAGGAAGGTGTGCAGGCTGTATGCTCCAGTCGTTGGAATTACATGCTAGTTCAGAAATAG  
MF375506.1 GAGGAAGGTGTGCAGGCTGTATGCTCCAGTTGTTTGGAAATTACATGCTAGTTCAGAAATAG  
MK442089.1 GAGGAAGGTGTGTAGGTTGTATGCTCCGTCGCTTGAATTATATGCTTGTTCAGAAATAG  
AJ863510.1 GAGGAAGGTGTGTAGGTTGTATGCTCCGTCGCTTGAATTATATGCTTGTTCAGAAATAG  
D00461.1 GAGGAAGGTGTGTAGGTTGTATGCTCCGTCGCTTGAATTATATGCTTGTTCAGAAATAG  
\*\*\*\*\*

MF418029.1 GCCACCCTCAGACTGGCAGGCTATGGGCTTTCAATGGGCTGCTTCGCTTGGCCGCTTTGGA  
KR152654.1 GCCACCATCAGACTGGCAGGCTATGGGTTTCAATGGAAAGCTCGCTTCGCCGCTTTTGA  
MF418035.1 GCCACCATCAGACTGGCAGGCTATGGGTTTCAATGGAAAGCTCGCTTCGCCGCTTTTGA  
MF418032.1 ACCCCCTCAGACTGGCAAGCCTATGGGTTTCAATGGAATGCACGTTTCGCCGCTTTTGA  
MF496659.1 GCCCCCTTCTGATTGGCAGGCTATGGGTTTCAATGGAATGCACGTTTCGCCGCTTTTGA  
MF418028.1 GCCCCCTTCGGATTGGCAGGCAATGGGTTTCAATGGAATGCACGCTTCGCCGCTTTTGA  
MH282867.1 GCCCCCTTCGGATTGGCAGGCAATGGGTTTCAATGGAATGCACGCTTCGCCGCTTTTGA  
MK563994.1 GCCCCCTTCGGATTGGCAGGCAATGGGTTTCAATGGAATGCACGCTTCGCCGCTTTTGA  
JQ647830.1 GCCCTCCTCGGACTGGCAGGCAATGGGTTTCAATGGAATGCACGTTTCGCCGCTTTTGA  
MN095414.1 GCCCTCCTCGGACTGGCAGGCAATGGGTTTCAATGGAATGCACGTTTCGCCGCTTTTGA  
KU058657.1 GCCCTCCTCGGACTGGCAGGCAATGGGTTTCAATGGAATGCACGCTTCGCCGCTTTTGA  
KU896946.1 GCCCTCCTCGGACTGGCAGGCAATGGGTTTCAATGGAATGCACGCTTCGCCGCTTTTGA  
MF033144.1 GCCCTCCTCGGACTGGCAGGCAATGGGTTTCAATGGAATGCACGCTTCGCCGCTTTTGA  
MF418030.1 GCCACCTTCGGATTGGCAGGCTATGGGTTTCAATGGAAAGCAGCTTCGCCGCTTTTGA  
MF418031.1 GCCACCTTCGGATTGGCAGGCAATGGGTTTCAATGGAAAGCAGCTTCGCCGCTTTTGA  
KP089978.1 GCCACCTTCGGATTGGCAGGCTATGGGTTTCAATGGAAAGCAGCTTCGCCGCTTTTGA  
KU896945.1 GCCACCTTCGGATTGGCAGGCTATGGGTTTCAATGGAAAGCAGCTTCGCCGCTTTTGA  
LC375228.1 GCCACCTTCGGATTGGCAGGCTATGGGTTTCAATGGAAAGCAGCTTCGCCGCTTTTGA  
KC430335.1 GCCACCTTCGGATTGGCAGGCTATGGGTTTCAATGGAAAGCAGCTTCGCCGCTTTTGA  
MF418033.1 GCCACCTTCGGATTGGCAGGCTATGGGTTTCAATGGAAAGCAGCTTCGCCGCTTTTGA  
MW331321.1 GCCACCTTCGGATTGGCAGGCTATGGGTTTCAATGGAAAGCAGCTTCGCCGCTTTTGA  
LC375227.1 GCCACCTTCGGATTGGCAGGCTATGGGTTTCAATGGAAAGCAGCTTCGCCGCTTTTGA  
MF375506.1 GCCACCTTCGATTGGCAGGCTATGGGTTTCAATGGAAAGCAGCTTCGCCGCTTTTGA  
MK442089.1 GCCACCTTCGGATTGGCAGGCTATGGGTTTCAATGGAAAGCAGCTTCGCCGCTTTTGA  
AJ863510.1 GCCACCTTCGATTGGCAGGCTATGGGTTTCAATGGAAAGCAGCTTCGCCGCTTTTGA  
D00461.1 GCCACCTTCGATTGGCAGGCTATGGGTTTCAATGGAAAGCAGCTTCGCCGCTTTTGA  
\*\*\* \*\*

MF418029.1 CACATTGATTATGTGACTAATGGCGCAAGCAATCAACCCGGTCCGAGGGCTATCCGAAG  
KR152654.1 CACATTGATTATGTGACTAATGGCGCGGCTATCAACCCGGTCCGAGGGGCTATCCGAAG  
MF418035.1 CACATTGATTATGTGACTAACGGCGCGGCTATCAACCCGGTCCGAGGGGCTATCCGAAG  
MF418032.1 CACATTGACTATGTGACTAACGGTGCAGCAATCCAGCCTGTAGAGGGGCTATCCGTAG  
MF496659.1 CACATTGATTATGTGACTAATGGTGCAGGATCCACCCCGTAGAGGGGCTATCCGTAG  
MF418028.1 CACATTGATTATGTGACTAACGGCGCGGATCCAGCCAGTGAGGGGCTATCCGTAG  
MH282867.1 CACATTGATTATGTGACTAACGGCGCGGATCCAGCCAGTGAGGGGCTATCCGTAG  
MK563994.1 CACATTGATTATGTGACTAACGGCGCGGATCCAGCCAGTGAGGGGCTATCCGTAG  
JQ647830.1 CACATTGATTATGTGACTAACGGCGCGGATCCAGCCTGTGAGGGGCTATCCGTAG  
MN095414.1 CACATTGATTATGTGACTAACGGCGCGGATCCAGCCTGTGAGGGGCTATCCGTAG  
KU058657.1 CACATTGATTATGTGACTAACGGCGCGGATCCAGCCTGTGAGGGGCTATCCGTAG  
KU896946.1 CACATTGATTATGTGACTAACGGCGCGGATCCAGCCTGTGAGGGGCTATCCGTAG  
MF033144.1 CACATTGATTATGTGACTAACGGCGCGGATCCAGCCTGTGAGGGGCTATCCGTAG  
MF418030.1 CACATTGATTATGTGACTAATGGGCTGCAATCCACCCCGTAGAGGGGCTATCCGAAG  
MF418031.1 CACATTGATTATGTGACTAATGGGCTGCAATCCACCCCGTAGAGGGGCTATCCGAAG  
KP089978.1 CACATTGATTATGTGACTAATGACGCTGCAATCCAGCCCGTAGAGGGGCTATCCGAAG  
KU896945.1 CACATTGATTATGTGACTAATGGGCTGCAATCCAGCCCGTAGAGGGGCTATCCGTAG  
LC375228.1 CACATTGATTATGTGACTAATGGGCTGCAATCCAGCCCGTAGAGGGGCTATCCGTAG  
KC430335.1 CACATTGATTATGTGACTAATGGGCTGCAATCCAGCCCGTAGAGGGGCTATCCGAAG  
MF418033.1 CACATTGATTATGTGACTAATGGGCTGCAATCCAGCCCGTAGAGGGGCTATCCGAAG  
MW331321.1 CACATTGATTATGTGACTAATGACGCTGCAATCCAGCCCGTAGAGGGGCTATCCGAAG  
LC375227.1 CACATTGATTATGTGACTAATGGGCTGCAATCCAGCCCGTAGAGGGGCTATCCGTAG  
MF375506.1 CACATTGATTATGTGACTAATGGGCTGCAATCCAGCCCGTAGAGGGGCTATCCGAAG  
MK442089.1 CACATTGATTATGTGACTAATGGGCTGCAATCCAGCCCGTAGAGGGGCTATCCGAAG  
AJ863510.1 CACATTGATTATGTGACTAACGGCGCTGCAATCCAGCCTGTGAGGGGCTATCCGTAG  
D00461.1 CACATTGATTATGTGACTAACGGCGCTGCAATCCAGCCTGTGAGGGGCTATCCGTAG  
\*\*\*\*\* \*\*

MF418029.1 GCCCACCTCCGAGGAAACAATAGCTCACAAAGCTCACAAAGCATGGCCATTGATAAGTC  
KR152654.1 GCCCACCTCCGAGGAAACTATAGCTCACAAAGCTCACAAAGCATGGCAATTGATAAGTC  
MF418035.1 GCCCACCTCCGAGGAAACTATAGCTCACAAAGCTCACAAAGCATGGCAATTGATAAGTC  
MF418032.1 GCCCACTCCTGAGGAGACAAATAGCTCATAATGCGCACAAAGCATGGCTTTGATAAGTC  
MF496659.1 GCCCACTCCTGAGGAGACGATAGCTCATAATGCGCATTAAGAGCATGGCAATTGATAAGTC  
MF418028.1 GCCCAGCCTGAGGAGACGATAGCTCATAACGCTCATTAAGAGCATGGCAATTGATAAGTC  
MH282867.1 GCCCTACGCTGAGAGACGATAGCTCATAACGCTCACAAAGAGCATGGCAATTGATAAGTC  
MK563994.1 GCCCAGCCTGAGGAGACGATAGCTCATAACGCTCATTAAGAGCATGGCAATTGATAAGTC  
JQ647830.1 GCCCTACGCTGAGGAGACGATAGCTCATAACGCTCACAAAGAGCATGGCAATTGATAAGTC  
MN095414.1 GCCCAGCCTGAGGAGACGATAGCTCATAACGCTCACAAAGAGCATGGCAATTGATAAGTC  
KU058657.1 GCCCAGCCTGAGGAGACGATAGCTCATAACGCTCACAAAGAGCATGGCAATTGATAAGTC  
KU896946.1 GCCCAGCCTGAGGAGACGATAGCTCATAACGCTCACAAAGAGCATGGCAATTGATAAGTC  
MF033144.1 GCCCAGCCTGAGGAGACGATAGCTCATAACGCTCACAAAGAGCATGGCAATTGATAAGTC  
MF418030.1 GCCCACCTCCGAGGAAACAATAGCTCACAATGCCACAAGAGATGGCAATTGATAAGTC  
MF418031.1 GCCCTACACCAAGGAAACAATAGCTCACAATGCCACAAGAGATGGCAATTGATAAGTC  
KP089978.1 GCCCACCTCCGAGGAAACAATAGCTCACAATGCCACAATGACACAAGAGATGGCAATTGATAAGTC  
KU896945.1 GCCCAGCCTGAGGAAACTATAGCTCACAATGCCACAAGAGATGGCAATTGATAAGTC  
LC375228.1 GCCCAGCCTGAGGAAACAATAGCTCACAATGCCACAAGAGATGGCAATTGATAAGTC  
KC430335.1 GCCCAGCCTGAGGAAACAATAGCTCACAATGCCACAAGAGATGGCAATTGATAAGTC  
MF418033.1 GCCCACCTCCGAGGAAACAATAGCTCACAATGCCACAAGAGATGGCAATTGATAAGTC  
MW331321.1 GCCCACCTCCGAGGAAACAATAGCTCACAATGCCACAAGAGATGGCAATTGATAAGTC  
LC375227.1 GCCCAGCCTGAGGAAACAATAGCTCACAATGCCACAAGAGATGGCAATTGATAAGTC  
MF375506.1 GCCCACCTCCGAGGAAACAATAGCTCACAATGCCACAAGAGATGGCAATTGATAAGTC  
MK442089.1 GCCCACCTCCGAGGAAACAATAGCTCACAATGCCACAAGAGATGGCAATTGATAAGTC  
AJ863510.1 GCCCAGCCTGAGGAGACAATAGCTCATAACGCTCACAAAGAGCATGGCTATTGATAAGTC  
D00461.1 GCCCAGCCTGAGGAGACAATAGCTCATAACGCTCACAAAGAGCATGGCTATTGATAAGTC  
\*\*\*\*\* \*\*



MF418029.1 GAATAGAAATGAGCGGCTGGCCAACACCAATGTTGAATACACTGGAGGTATGCTTGGTGC  
KR152654.1 CAATAGGAATGAGCGCTGGCCAACACAAATGTTGAATACACTGGAGGTATGCTGGTGC  
MF418035.1 CAATAGGAATGAGCGGCTGGCCAACACAAATGTTGAGTACACTGGAGGTATGCTTGGTGC  
MF418032.1 AAACAGAAATGAAAGGCTGGTCAACACTAATGTTGAGTACACTGGGGCATGCTTGGCGC  
MF496659.1 GAACAGAAATGAAAGGCTGGCCAACACCAACGTTGAATACACTGGGGCATGCTTGGCGC  
MF418028.1 GAACAGAAATGAAAGGCTGGCCAACACCAACGTTGAATACACTGGGGCATGCTGGTGC  
MH282867.1 GAACAGAAATGAAAGGCTGGCCAACACCAACGTTGAATACACTGGGGCATGCTAGGCGC  
MK563994.1 GAACAGAAATGAAAGGCTGGCCAACACCAACGTTGAATACACTGGGGCATGCTGGTGC  
JQ647830.1 CAACAGAAATGAAAGGCTGGCCAACACCAACGTTGAATACACTGGGGCATGCTGGCGC  
MN095414.1 TAACAGAAATGAAAGGCTGGCTTAACACCAACGTTGAATACACTGGGGCATGCTGGCGC  
KU058657.1 TAACAGAAATGAAAGGCTGGCCAACACCAACGTTGAATACACTGGGGCATGCTGGCGC  
KU896946.1 TAACAGAAATGAAAGGCTGGCCAACACCAACGTTGAATACACTGGGGCATGCTGGCGC  
MF033144.1 TAACAGAAATGAAAGGCTGGCCAACACCAACGTTGAATACACTGGGGCATGCTGGCGC  
MF418030.1 GAACAGAAATGAGCGATTGGCCAACACTAATGTTGAGTACACTGGAGGATGCTTGGCGC  
MF418031.1 GAACAGAAATGAGCGATTGGCCAACACTAATGTTGAGTACACTGGAGGATGCTTGGCGC  
KP089978.1 GAACAGAAATGAGCGATTGGCCAACACTAATGTTGAGTACACTGGAGGATGCTTGGCGC  
KU896945.1 GAACAGAAATGAGCGATTGGCCAACACTAATGTTGAGTACACTGGAGGATGCTTGGCGC  
LC375228.1 GAACAGAAATGAGCGATTGGCCAACACTAATGTTGAGTACACTGGAGGATGCTTGGCGC  
KC430335.1 GAACAGAAATGAGCGATTGGCCAACACTAATGTTGAGTACACTGGAGGATGCTTGGCGC  
MF418033.1 GAACAGAAATGAGCGATTGGCCAACCAATGTTGAGTACACTGGAGGATGCTTGGCGC  
MW331321.1 GAACAGAAATGAGCGATTGGCCAACACTAATGTTGAGTACACTGGAGGATGCTTGGCGC  
LC375227.1 GAACAGAAATGAGCGATTGGCCAACACTAATGTTGAGTACACTGGAGGATGCTTGGCGC  
MF375506.1 GAACAGAAATGAGCGATTGGCCAACACTAATGTTGAGTACACTGGAGGATGCTTGGCGC  
MK442089.1 GAACAGAAATGAGCGATTGGCCAACACCAATGTTGAGTACACTGGAGGATGCTTGGCGC  
AJ863510.1 GAACAGAAATGAAAGGTTGGCTAACACCAACGTTGAGTACTGGGGCATGCTGGTGC  
D00461.1 GAACAGAAATGAAAGGTTGGCTAACACCAACGTTGAGTACTGGGGCATGCTGGTGC  
\*\*\*\*\* \* \*\*\*\*\* \*\* \*\*\*\*\* \*\*\*\*

MF418029.1 TGAGATCGTGCGCAATCATAGGAATGCAATTAACCAATGAAAGCGGAGCGTCTAGGAATG  
KR152654.1 TGAGATCGTGCGCAATCACAGGAATGCAATTAACCAATGAAAGCGGAGCGTCTAAGTATG  
MF418035.1 GAGATCGTGCGCAATCATAGGAATGCAATTAACCAATGAAAGCGGAGCGTCTAAGTATG  
MF418032.1 TGAGATTGTGCGCAACCATCGGAATGCGATAAACCAATGAAGCGGAGCGTTAGAAATG  
MF496659.1 TGAGATTGTGCGCAACCATCGGAATGCAATTAACCAATGAAAGCGGAGCGTTAGAAATG  
MF418028.1 AGAGTCTGTGCGTAATCATCGGAATGCAGCAAAACCAATGAGAGCGGAACGTCTAAATATG  
MH282867.1 AGAGTCTGTGCGTAATCATCGGAATGCAGCAAAACCAATGAGAGCGGAACGTCTAAATATG  
MK563994.1 AGAGTCTGTGCGTAATCATCGGAATGCAGCAAAACCAATGAGAGCGGAACGTCTAAATATG  
JQ647830.1 TGAGTCTGTGCGTAACCATCGGAATGCAGCAAAACCAATGAGAGCGGAACGTCTAAATATG  
MN095414.1 TGAGATCGTGCGTAACCATCGGAATGCAGCAAAACCAATGAGAGCGGAACGTCTAAATATG  
KU058657.1 TGAGATCGTGCGTAACCATCGGAATGCAGCAAAACCAATGAGAGCGGAACGTCTAAATATG  
KU896946.1 TGAGATCGTGCGTAACCATCGGAATGCAGCAAAACCAATGAGAGCGGAACGTCTAAATATG  
MF033144.1 GAGATCGTGCGTAACCATCGGAATGCAGCAAAACCAATGAGAGCGGAACGTCTAAATATG  
MF418030.1 TGAGATTGTGCGCAATCACCAGCAATGCATTAACCAATGAAGGCAGACCGTTTAGCCATG  
MF418031.1 TGAATTTGTGCGCAATCACCAGCAATGCATTAACCAATGAAGGCAGACCGTTTAGCCATG  
KP089978.1 TGAGATTGTGCGCAATCATCGTAATGCATTAACCAATGAAGGCAGACCGTTTAGCTATG  
KU896945.1 TGAGATTGTGCGCAATCACCAGTAATGCATTAACCAATGAAGGCAGACCGTTTAGCCACG  
LC375228.1 TGAGATTGTGCGCAATCACCAGTAATGCATTAACCAATGAAGGCAGACCGTTTAGCCACG  
KC430335.1 TGAGATTGTGCGCAATCACCAGTAATGCATTAACCAATGAAGGCAGACCGTTTAGCCATG  
MF418033.1 GAGATTGTGCGCAATCACCAGTAATGCATTAACCAATGAAGGCAGACCGTTTAGCCATG  
MW331321.1 TGAGATTGTGCGCAATCACCAGTAATGCATTAACCAATGAAGGCAGACCGTTTAGCCATG  
LC375227.1 TGAGATTGTGCGCAATCACCAGTAATGCATTAACCAATGAAGGCAGACCGTTTAGCCACG  
MF375506.1 TGAGATTGTGCGCAATCACCAGCAATGCATTAACCAATGAAGGCAGACCGTTTAGCCATG  
MK442089.1 GAGATTGTGCGCAATCACCAGTAATGCATTAACCAATGAAGGCAGACCGTTTAGCCATG  
AJ863510.1 TGAGATTGTGCGTAATCATCGGAATGCAATTAACCAATGAAAGCGGAGCGTTAGAAATG  
D00461.1 TGAGATTGTGCGTAATCATCGGAATGCAATTAACCAATGAAAGCGGAGCGTTAGAAATG  
\*\*\*\*\* \*\*\*\*\* \* \*\*\*\*\* \* \*\*\*\*\*
