# Supplementary material for: Virus Elimination from Naturally Infected Field Cultivars of Potato (Solanum tuberosum) by Transgenic RNA Interference
Source: MDPI journal article supplement (doi:10.3390/ijms23148020), 2022-07-20
Supplement: s1 [file s1]

**Table S2.** Field trials of PCR-positive transformant lines of naturally-infected potato cultivars

| Cultivar<br>(virus infection before<br>transformation)                              | Line #                 | Construct used for<br>transformation | Virus detection by ELISA |            |                   |
|-------------------------------------------------------------------------------------|------------------------|--------------------------------------|--------------------------|------------|-------------------|
|                                                                                     |                        |                                      | 2017                     | 2018       | 2019              |
| <b>Albinka</b><br>(PVM + PVY)                                                       | Non transformed parent | -                                    | PVM                      | PVY        | PVM<br>PVY        |
|                                                                                     | 39                     | S-25K-AS                             | PVY                      | PVY        | PVY               |
|                                                                                     | 43                     | S-25K-AS                             | -                        | *          | *                 |
|                                                                                     | 46                     | S-25K-AS                             | -                        | PVY        | PVY               |
|                                                                                     | 47                     | S-25K-AS                             | PVY                      | *          | *                 |
|                                                                                     | 48                     | S-25K-AS                             | PVM<br>PVY               | PVY        | PVY               |
|                                                                                     | 74                     | S-25K-AS                             | PVY                      | PVY        | PVS<br>PVM<br>PVY |
|                                                                                     | 159                    | S-25K-AS                             | PVY                      | PVY        | *                 |
| <b>Dunyasha</b><br>(PVM)                                                            | 218                    | S-25K-AS                             | PVM<br>PVY               | *          | *                 |
|                                                                                     | Non transformed parent | -                                    | -                        | PVM        | PVM<br>PVY        |
|                                                                                     | 44                     | S-25K-AS                             | -                        | -          | PVY               |
|                                                                                     | 61                     | S-25K-AS                             | PVM                      | -          | -                 |
|                                                                                     | 62                     | S-25K-AS                             | -                        | -          | PVY               |
|                                                                                     | 65                     | S-25K-AS                             | PVM                      | -          | PVY               |
|                                                                                     | 67                     | S-25K-AS                             | -                        | -          | PVY               |
|                                                                                     | 146                    | AS-CP-S                              | -                        | -          | -                 |
|                                                                                     | 162                    | AS-CP-S                              | -                        | -          | -                 |
|                                                                                     | 293                    | AS-CP-S                              | PVM                      | -          | PVS               |
|                                                                                     | 294                    | AS-CP-S                              | -                        | -          | -                 |
| <b>Fortuna</b><br>(PVS + PVM)                                                       | 312                    | AS-25K-S                             | -                        | -          | PVM               |
|                                                                                     | 374                    | AS-25K-S                             | PVM                      | -          | PVY               |
|                                                                                     | Non transformed parent | -                                    | *                        | PVS        | PVS               |
|                                                                                     | 309                    | AS-CP-S                              | PVS                      | PVS        | PVS               |
|                                                                                     | 360                    | AS-CP-S                              | -                        | -          | -                 |
| <b>Kormilitsa</b><br>(PVS)                                                          | 361                    | AS-CP-S                              | PVS<br>PVY               | PVS        | -                 |
|                                                                                     | Non transformed parent | -                                    | *                        | *          | *                 |
| <b>Picasso</b><br>(PVM + PVY)                                                       | 103                    | S-25K-AS                             | -                        | -          | -                 |
|                                                                                     | Non transformed parent | -                                    | *                        | *          | *                 |
|                                                                                     | 192                    | AS-CP-S                              | PVY                      | PVY        | PVY               |
|                                                                                     | 194                    | AS-25K-S                             | PVM                      | PVY        | PVY               |
|                                                                                     | 257                    | AS-CP-S                              | -                        | -          | PVY               |
|                                                                                     | 351                    | AS-25K-S                             | PVM<br>PVY               | PVY        | PVY               |
|                                                                                     | 161                    | AS-CP-S                              | PVM                      | *          | *                 |
|                                                                                     | 172                    | AS-CP-S                              | PVY                      | *          | *                 |
|                                                                                     | 352                    | AS-25K-S                             | PVM<br>PVY               | *          | *                 |
|                                                                                     | 381                    | AS-25K-S                             | PVY                      | *          | *                 |
|                                                                                     | 382                    | AS-25K-S                             | -                        | *          | *                 |
|                                                                                     | 383                    | AS-25K-S                             | PVM                      | *          | *                 |
|                                                                                     | 384                    | AS-25K-S                             | -                        | *          | *                 |
| <b>Sante</b><br>(PVM + PVY)                                                         | Non transformed parent | -                                    | PVM                      | PVM<br>PVY | PVY               |
|                                                                                     | 295                    | AS-CP-S                              | PVM                      | PVS<br>PVY | PVY               |
|                                                                                     | 291                    | AS-CP-S                              | -                        | *          | *                 |
|                                                                                     | 339                    | AS-CP-S                              | PVM                      | *          | *                 |
| <b>Zeren</b><br>(PVS + PVM + PVY)                                                   | Non transformed parent | -                                    | *                        | *          | PVS<br>PVY        |
|                                                                                     | 38                     | S-25K-AS                             | PVS<br>PVY               | PVS<br>PVY | PVS<br>PVY        |
|                                                                                     | 59                     | S-25K-AS                             | PVS<br>PVY               | PVS<br>PVY | PVS<br>PVY        |
|                                                                                     | 119                    | S-25K-AS                             | -                        | PVY        | PVY               |
|                                                                                     | 336                    | AS-25K-S                             | -                        | -          | PVY               |
|                                                                                     | 344                    | AS-25K-S                             | PVS                      | PVS<br>PVY | PVS<br>PVY        |
| Triumph                                                                             | Non transformed        | -                                    | -                        | PVM<br>PVY | PVM<br>PVY        |
| Imperatrissa                                                                        | Non transformed        | -                                    | PVM                      | *          | *                 |
| Milena                                                                              | Non transformed        | -                                    | PVM                      | PVM<br>PVY | PVM<br>PVY        |
| * not detected, because the plant died, or no tuber obtained in the previous season |                        |                                      |                          |            |                   |
| - virus free                                                                        |                        |                                      |                          |            |                   |
