# Supplementary material for: Virus Elimination from Naturally Infected Field Cultivars of Potato (Solanum tuberosum) by Transgenic RNA Interference
Source: Int J Mol Sci. 2022 Jul 20;23(14):8020. doi: 10.3390/ijms23148020 (PMC9321115; doi:10.3390/ijms23148020)
Supplement: Supplementary file 1 [file ijms-23-08020-s001.zip]

Archive with 6 entries (6 files):
- Table S2 IJMS.pdf
- Dataset S1 IJMS.pdf
- Dataset S2 IJMS.xlsx
- Dataset S3 IJMS.xlsx
- Figure S1 IJMS.pdf
- Table S1 IJMS.pdf
