# Supplementary material for: Virus Elimination from Naturally Infected Field Cultivars of Potato (Solanum tuberosum) by Transgenic RNA Interference
Source: Int J Mol Sci. 2022 Jul 20;23(14):8020. doi: 10.3390/ijms23148020 (PMC9321115; doi:10.3390/ijms23148020)
Supplement: Supplementary file 1 [file ijms-23-08020-s001.zip › Dataset S2 IJMS.xlsx]

## Sheet: Legend
Dataset S2. Counts of Illumina sRNA-seq reads from control and transgenic potato plants. The 20-25 nt reads from each library [non-transformed Zeren plant (field plant ALYU-75), the transgenic plant lines of cultivars Zeren (line #119: field plant ALYU-76 and in vitro plant ALYU-77), Dunyasha (line #61: field plant ALYU-78) and Kormilitsa (line #103: field plant ALYU-79)] were mapped without mism…

## Sheet: S1A perfect match (pm)
sRNA library	Total number of 1-50 nt reads	Total number of 20-25 nt reads	zero mismatches
			S.tuberosum complete genome				PVY				PVS				PVS 25K hairpin RNA transgene
ALYU-75 Zeren non-transformed field PVS + PVY
				total	forward	reverse		total	forward	reverse		total	forward	reverse		total	forward	reverse
	35869294	29418323	20-25 nt	19809079	10154754	9654325	20-25 nt	3836247	2001802	1834445	20-25 nt	194675	121586	73089	20-25 nt	5060	2496	2564
			20 nt	814727	424569	390158	20 nt	67191	35340	31851	20 nt	11563	9680	1883	20 nt	305	155	150
			21 nt	9038231	4821473	4216758	21 nt	3424818	1780095	1644723	21 nt	124280	67817	56463	21 nt	3582	1737	1845
			22 nt	4307602	2075351	2232251	22 nt	316892	167687	149205	22 nt	34637	22656	11981	22 nt	712	377	335
			23 nt	701016	350709	350307	23 nt	12725	8100	4625	23 nt	9868	8510	1358	23 nt	226	110	116
			24 nt	4491812	2241427	2250385	24 nt	10691	7194	3497	24 nt	8290	7318	972	24 nt	142	74	68
			25 nt	455691	241225	214466	25 nt	3930	3386	544	25 nt	6037	5605	432	25 nt	93	43	50
ALYU-76 Zeren transgenic line #119 field PVY				total	forward	reverse		total	forward	reverse		total	forward	reverse		total	forward	reverse
	35723314	29952043	20-25 nt	20566422	10544323	10022099	20-25 nt	4648268	2155642	2492626	20-25 nt	48483	29718	18765	20-25 nt	181703	90798	90905
			20 nt	702508	352673	349835	20 nt	73082	38343	34739	20 nt	1470	702	768	20 nt	3642	1863	1779
			21 nt	12453123	6641323	5811800	21 nt	4305867	1973710	2332157	21 nt	40822	25505	15317	21 nt	144937	72412	72525
			22 nt	4111186	1901263	2209923	22 nt	238822	119937	118885	22 nt	3349	1830	1519	22 nt	16981	8538	8443
			23 nt	422096	211544	210552	23 nt	11317	8665	2652	23 nt	253	100	153	23 nt	1058	506	552
			24 nt	2672378	1333671	1338707	24 nt	13299	9766	3533	24 nt	2557	1563	994	24 nt	14879	7368	7511
			25 nt	205131	103849	101282	25 nt	5881	5221	660	25 nt	32	18	14	25 nt	206	111	95
ALYU-77 Zeren transgenic line #119 in vitro virus-free				total	forward	reverse		total	forward	reverse		total	forward	reverse		total	forward	reverse
	33830699	25122149	20-25 nt	19939383	9812063	10127320	20-25 nt	2196	1085	1111	20-25 nt	11394	3893	7501	20-25 nt	97211	48624	48587
			20 nt	945096	477474	467622	20 nt	80	48	32	20 nt	135	53	82	20 nt	971	508	463
			21 nt	8039507	3661038	4378469	21 nt	1920	930	990	21 nt	8822	2684	6138	21 nt	79526	39757	39769
			22 nt	4373963	2380249	1993714	22 nt	168	82	86	22 nt	1426	458	968	22 nt	10342	5166	5176
			23 nt	951988	484070	467918	23 nt	10	9	1	23 nt	86	49	37	23 nt	412	202	210
			24 nt	4967087	2478293	2488794	24 nt	14	12	2	24 nt	912	640	272	24 nt	5909	2962	2947
			25 nt	661742	330939	330803	25 nt	4	4	0	25 nt	13	9	4	25 nt	51	29	22
ALYU-78 Dunyasha transgenic line #61 field virus-free				total	forward	reverse		total	forward	reverse		total	forward	reverse		total	forward	reverse
	31627721	24088130	20-25 nt	17317544	9051329	8266215	20-25 nt	2077	1018	1059	20-25 nt	128437	50313	78124	20-25 nt	936541	468597	467944
			20 nt	958581	534414	424167	20 nt	56	26	30	20 nt	2048	1089	959	20 nt	10711	5424	5287
			21 nt	5337918	2704336	2633582	21 nt	1859	893	966	21 nt	101911	38948	62963	21 nt	771810	386313	385497
			22 nt	3866788	2157765	1709023	22 nt	146	86	60	22 nt	17792	6157	11635	22 nt	118538	59072	59466
			23 nt	864494	456342	408152	23 nt	5	4	1	23 nt	1195	785	410	23 nt	4762	2378	2384
			24 nt	5615350	2829886	2785464	24 nt	9	7	2	24 nt	5435	3314	2121	24 nt	30314	15190	15124
			25 nt	674413	368586	305827	25 nt	2	2	0	25 nt	56	20	36	25 nt	406	220	186
ALYU-79 Kormilitsa transgenic line #103 field PVY				total	forward	reverse		total	forward	reverse		total	forward	reverse		total	forward	reverse
	35229577	28946482	20-25 nt	20108414	10314239	9794175	20-25 nt	1062270	553182	509088	20-25 nt	174897	68868	106029	20-25 nt	1217582	608971	608611
			20 nt	555416	300154	255262	20 nt	15305	8159	7146	20 nt	2595	1108	1487	20 nt	13904	6916	6988
			21 nt	7876499	3976423	3900076	21 nt	944169	490048	454121	21 nt	128136	49941	78195	21 nt	932235	466259	465976
			22 nt	5128216	2745316	2382900	22 nt	94590	49493	45097	22 nt	31623	9483	22140	22 nt	199769	99900	99869
			23 nt	615542	317284	298258	23 nt	3888	2449	1439	23 nt	2190	1319	871	23 nt	9214	4594	4620
			24 nt	5613886	2809775	2804111	24 nt	3223	2123	1100	24 nt	10239	6978	3261	24 nt	61735	30910	30825
			25 nt	318855	165287	153568	25 nt	1095	910	185	25 nt	114	39	75	25 nt	725	392	333

## Sheet: S1B 0-2 mismatches 
sRNA library	Total number of 1-50 nt reads	Total number of 20-25 nt reads	0-2 mismatches
			S.tuberosum complete genome				PVY				PVS				PVS 25K hairpin RNA transgene
ALYU-75 Zeren non-transformed field PVS + PVY
				total	forward	reverse		total	forward	reverse		total	forward	reverse		total	forward	reverse
	35869294	29418323	20-25 nt	28088988	14258257	13830731	20-25 nt	3977123	2065030	1912093	20-25 nt	205760	126976	78784	20-25 nt	16914	8379	8535
			20 nt	1022103	531740	490363	20 nt	71657	37340	34317	20 nt	12553	10143	2410	20 nt	1100	561	539
			21 nt	13180156	6853090	6327066	21 nt	3540171	1831537	1708634	21 nt	130296	70354	59942	21 nt	11334	5615	5719
			22 nt	5046539	2451149	2595390	22 nt	335374	176109	159265	22 nt	37033	23882	13151	22 nt	2550	1293	1257
			23 nt	983731	494129	489602	23 nt	14363	8855	5508	23 nt	10635	9020	1615	23 nt	778	369	409
			24 nt	7232987	3606494	3626493	24 nt	11332	7597	3735	24 nt	8826	7685	1141	24 nt	651	310	341
			25 nt	623472	321655	301817	25 nt	4226	3592	634	25 nt	6417	5892	525	25 nt	501	231	270
ALYU-76 Zeren transgenic line #119 field PVY				total	forward	reverse		total	forward	reverse		total	forward	reverse		total	forward	reverse
	35723314	29952043	20-25 nt	28764826	14585272	14179554	20-25 nt	4801005	2220343	2580662	20-25 nt	191148	91286	99862	20-25 nt	193304	96558	96746
			20 nt	930585	468125	462460	20 nt	77689	40355	37334	20 nt	4267	1843	2424	20 nt	4144	2099	2045
			21 nt	17731387	9198155	8533232	21 nt	4435405	2028152	2407253	21 nt	151928	72794	79134	21 nt	152982	76410	76572
			22 nt	4867598	2300634	2566964	22 nt	254755	126562	128193	22 nt	17983	8802	9181	22 nt	18723	9408	9315
			23 nt	618504	311964	306540	23 nt	12773	9448	3325	23 nt	1173	483	690	23 nt	1199	578	621
			24 nt	4324841	2159415	2165426	24 nt	14103	10317	3786	24 nt	15498	7266	8232	24 nt	15879	7871	8008
			25 nt	291911	146979	144932	25 nt	6280	5509	771	25 nt	299	98	201	25 nt	377	192	185
ALYU-77 Zeren transgenic line #119 in vitro virus-free				total	forward	reverse		total	forward	reverse		total	forward	reverse		total	forward	reverse
	33830699	25122149	20-25 nt	24312608	12026247	12286361	20-25 nt	3530	1714	1816	20-25 nt	100887	45565	55322	20-25 nt	100673	50336	50337
			20 nt	1088236	560885	527351	20 nt	162	92	70	20 nt	1766	507	1259	20 nt	1070	551	519
			21 nt	8642994	3967713	4675281	21 nt	3021	1436	1585	21 nt	81553	36565	44988	21 nt	81622	40806	40816
			22 nt	4654080	2529740	2124340	22 nt	306	152	154	22 nt	10846	5325	5521	22 nt	10791	5389	5402
			23 nt	1203828	614852	588976	23 nt	18	14	4	23 nt	497	187	310	23 nt	491	237	254
			24 nt	7901637	3942155	3959482	24 nt	18	15	3	24 nt	6129	2936	3193	24 nt	6576	3289	3287
			25 nt	821833	410902	410931	25 nt	5	5	0	25 nt	96	45	51	25 nt	123	64	59
ALYU-78 Dunyasha transgenic line #61 field virus-free				total	forward	reverse		total	forward	reverse		total	forward	reverse		total	forward	reverse
	31627721	24088130	20-25 nt	22625497	11739109	10886388	20-25 nt	2912	1388	1524	20-25 nt	947361	482367	464994	20-25 nt	964591	482537	482054
			20 nt	1077360	598459	478901	20 nt	124	53	71	20 nt	11535	6266	5269	20 nt	11601	5881	5720
			21 nt	6146651	3136920	3009731	21 nt	2525	1190	1335	21 nt	778290	392318	385972	21 nt	790070	395367	394703
			22 nt	4203280	2334817	1868463	22 nt	232	125	107	22 nt	120454	67061	53393	22 nt	123641	61615	62026
			23 nt	1215202	634261	580941	23 nt	13	7	6	23 nt	5511	2477	3034	23 nt	5871	2942	2929
			24 nt	9099050	4564650	4534400	24 nt	14	10	4	24 nt	30907	13974	16933	24 nt	32565	16286	16279
			25 nt	883954	470002	413952	25 nt	4	3	1	25 nt	664	271	393	25 nt	843	446	397
ALYU-79 Kormilitsa transgenic line #103 field PVY				total	forward	reverse		total	forward	reverse		total	forward	reverse		total	forward	reverse
	35229577	28946482	20-25 nt	27024480	13776169	13248311	20-25 nt	1103635	571701	531934	20-25 nt	1239996	593572	646424	20-25 nt	1257948	629310	628638
			20 nt	725470	380838	344632	20 nt	16895	8867	8028	20 nt	15137	7968	7169	20 nt	15343	7666	7677
			21 nt	9910824	4994246	4916578	21 nt	978146	505250	472896	21 nt	946786	449458	497328	21 nt	956844	478615	478229
			22 nt	5670242	3027159	2643083	22 nt	99676	51708	47968	22 nt	203609	100559	103050	22 nt	207607	103848	103759
			23 nt	929058	478070	450988	23 nt	4319	2651	1668	23 nt	10362	4467	5895	23 nt	10940	5501	5439
			24 nt	9299978	4646099	4653879	24 nt	3421	2262	1159	24 nt	62919	30692	32227	24 nt	65680	32903	32777
			25 nt	488908	249757	239151	25 nt	1178	963	215	25 nt	1183	428	755	25 nt	1534	777	757

## Sheet: S1C pm 5' nt identity
sRNA library	S.tuberosum complete genome 5' nt %A/%C/%G/%U													PVY 5' nt %A/%C/%G/%U													PVS 5' nt %A/%C/%G/%U													PVS 25K hairpin RNA transgene 5' nt %A/%C/%G/%U
		Total				Forward				Reverse					Total				Forward				Reverse					Total				Forward				Reverse					Total				Forward				Reverse
ALYU-75 Zeren non-transformed field PVS + PVY		%A	%C	%G	%U	%A	%C	%G	%U	%A	%C	%G	%U		%A	%C	%G	%U	%A	%C	%G	%U	%A	%C	%G	%U		%A	%C	%G	%U	%A	%C	%G	%U	%A	%C	%G	%U		%A	%C	%G	%U	%A	%C	%G	%U	%A
	20-25 nt	43.4194	12.733	13.3832	30.4645	43.7304	11.3101	15.5379	29.4215	43.1083	14.1559	11.2284	31.5074	20-25 nt	41.9405	15.2835	7.71839	35.0576	42.9383	17.6046	9.91848	29.5386	40.9428	12.9623	5.5183	40.5766	20-25 nt	35.2535	18.6201	12.8477	33.2787	31.4809	20.7967	16.7188	31.0035	39.0261	16.4435	8.97662	35.5538	20-25 nt	23.9142	23.8587	16.9798	35.2472	23.6559	22.6209	17.936	35.7873	24.1726
	20 nt	32.5553	22.9245	20.2548	24.2653	34.1337	14.5802	25.3994	25.8867	30.9769	31.2689	15.1103	22.6439	20 nt	37.3742	22.4296	7.3876	32.8085	42.3005	20.4895	8.7691	28.4409	32.448	24.3697	6.00609	37.1762	20 nt	34.4174	20.7244	14.532	30.3263	31.0227	22.4897	20.9917	25.4959	37.812	18.9591	8.07223	35.1567	20 nt	31.7419	19.4194	17.3871	31.4516	35.4839	14.8387	16.7742	32.9032	28
	21 nt	15.2484	6.48123	13.3761	64.8943	13.717	6.21833	21.5497	58.515	16.7798	6.74414	5.20243	71.2736	21 nt	36.1243	18.8204	7.13922	37.9161	40.4471	21.8948	6.62414	31.0339	31.8015	15.7459	7.6543	44.7982	21 nt	36.334	13.7982	4.72028	45.1475	38.3694	14.5524	6.3288	40.7494	34.2986	13.0439	3.11177	49.5457	21 nt	28.9623	15.7667	12.4692	42.8017	29.361	14.6229	13.0685	42.9476	28.5637
	22 nt	65.3077	5.65331	5.46759	23.5714	67.6699	4.50921	6.50213	21.3188	62.9456	6.7974	4.43306	25.824	22 nt	37.9396	17.438	3.80439	40.818	41.2369	19.0301	4.37362	35.3593	34.6423	15.846	3.23515	46.2766	22 nt	33.1902	12.7468	6.19231	47.8706	30.482	13.3828	10.3063	45.8289	35.8985	12.1108	2.07829	49.9124	22 nt	23.9922	17.41	8.37325	50.2245	26.7905	17.5066	9.28382	46.4191	21.194
	23 nt	41.803	18.2261	15.6181	24.3528	42.3017	17.3072	16.9673	23.4237	41.3043	19.1449	14.2689	25.2818	23 nt	41.0853	11.4214	7.64198	39.8513	41.0247	14.6049	11.284	33.0864	41.1459	8.23784	4	46.6162	23 nt	34.9918	20.1523	14.9604	29.8955	28.3784	25.1351	21.0106	25.4759	41.6053	15.1694	8.91016	34.3152	23 nt	19.4357	22.116	19.5063	38.942	18.1818	21.8182	20.9091	39.0909	20.6897
	24 nt	75.3657	4.04733	7.2049	13.382	75.3059	4.45265	7.02298	13.2185	75.4255	3.642	7.38682	13.5456	24 nt	52.7946	8.11953	8.3175	30.7683	52.5438	11.1204	11.7737	24.5621	53.0455	5.11867	4.86131	36.9745	24 nt	39.8751	18.8104	18.1706	23.1439	31.0877	23.0118	22.2465	23.654	48.6626	14.6091	14.0947	22.6337	24 nt	17.0509	28.8355	19.5151	34.5986	13.5135	29.7297	24.3243	32.4324	20.5882
	25 nt	30.236	19.0655	18.3775	32.3211	29.2544	20.793	15.7861	34.1664	31.2175	17.3379	20.9688	30.4757	25 nt	46.3252	13.4719	12.0196	28.1833	40.0768	18.4879	16.6864	24.749	52.5735	8.45588	7.35294	31.6176	25 nt	32.7123	25.4886	18.5108	23.2882	29.545	26.2087	19.4291	24.8171	35.8796	24.7685	17.5926	21.7593	25 nt	22.3023	39.6047	24.6279	13.4651	18.6047	37.2093	23.2558	20.9302	26
ALYU-76 Zeren transgenic line #119 field PVY		%A	%C	%G	%U	%A	%C	%G	%U	%A	%C	%G	%U		%A	%C	%G	%U	%A	%C	%G	%U	%A	%C	%G	%U		%A	%C	%G	%U	%A	%C	%G	%U	%A	%C	%G	%U		%A	%C	%G	%U	%A	%C	%G	%U	%A
	20-25 nt	40.4405	13.2872	13.7436	32.5288	40.0626	11.2341	17.1013	31.6021	40.8183	15.3403	10.3858	33.4556	20-25 nt	42.7697	16.5799	9.31959	31.3308	41.6074	18.5348	11.9934	27.8644	43.932	14.625	6.64578	34.7972	20-25 nt	27.8368	19.3227	8.87621	43.9643	23.6475	13.5506	16.5298	46.2721	32.0262	25.0948	1.22264	41.6564	20-25 nt	40.3029	17.901	8.05388	33.7423	40.2618	17.2153	8.23981	34.2831	40.344
	20 nt	24.3978	26.1751	21.5339	27.8932	26.7999	13.0654	30.8626	29.2722	21.9958	39.2848	12.2052	26.5142	20 nt	39.6803	22.0296	8.13504	30.155	45.4477	19.1247	10.0149	25.4127	33.9129	24.9345	6.25522	34.8974	20 nt	29.8116	9.32492	17.173	43.6905	33.1909	6.41026	31.4815	28.9174	26.4323	12.2396	2.86458	58.4635	20 nt	32.0375	17.6052	9.82739	40.53	31.0789	17.3913	9.93022	41.5996	32.9961
	21 nt	14.8975	5.55734	15.4446	64.1006	12.32	5.56638	25.5315	56.5821	17.475	5.5483	5.3577	71.619	21 nt	36.0838	18.0968	8.59213	37.2272	39.8958	21.3999	7.34171	31.3626	32.2718	14.7937	9.84256	43.0919	21 nt	35.8096	15.6141	9.83902	38.7373	40.7646	8.8022	17.7455	32.6877	30.8546	22.4261	1.93249	44.7868	21 nt	39.6544	15.9083	5.42517	39.0121	39.6191	15.9614	5.49909	38.9203	39.6898
	22 nt	55.5341	4.95794	4.90628	34.6017	56.2282	3.30117	6.32927	34.1414	54.8401	6.61471	3.48329	35.0619	22 nt	38.6704	18.3751	5.03034	37.9242	38.4469	20.585	5.73718	35.231	38.8939	16.1652	4.32351	40.6174	22 nt	16.8765	21.254	5.67317	56.1963	18.7432	16.1749	10.8197	54.2623	15.0099	26.3331	0.526662	58.1303	22 nt	40.6485	17.3516	4.32222	37.6777	41.1572	16.8541	4.3687	37.6201	40.1398
	23 nt	37.4972	21.3223	16.6953	24.4853	36.1873	21.9907	18.4822	23.3398	38.807	20.6538	14.9084	25.6307	23 nt	39.2296	16.782	12.4709	31.5175	36.6417	19.2729	17.438	26.6474	41.8175	14.2911	7.50377	36.3876	23 nt	16.3235	23.8203	5	54.8562	15	13	10	62	17.6471	34.6405	0	47.7124	23 nt	21.8626	29.3561	5.26186	43.5194	20.3557	30.6324	4.54545	44.4664	23.3696
	24 nt	74.9626	4.36044	6.54172	14.1353	74.7397	5.00393	6.39191	13.8644	75.1855	3.71694	6.69153	14.4061	24 nt	55.5171	9.44046	9.5061	25.5363	49.6416	13.588	13.5777	23.1927	61.3926	5.29295	5.43447	27.88	24 nt	32.0887	7.82764	4.46093	55.6227	11.9642	3.58285	6.90979	77.5432	52.2133	12.0724	2.01207	33.7022	24 nt	43.1523	10.352	17.7778	28.7179	43.5939	9.83985	17.8882	28.6781	42.7107
	25 nt	35.3536	17.3499	17.3396	29.9569	34.1005	18.4768	15.0103	32.4124	36.6067	16.223	19.6688	27.5014	25 nt	47.437	14.7554	12.1831	25.6245	39.571	17.2381	17.851	25.34	55.303	12.2727	6.51515	25.9091	25 nt	36.1111	38.0952	11.1111	14.6825	22.2222	33.3333	22.2222	22.2222	50	42.8571	0	7.14286	25 nt	64.4618	16.8326	5.70887	12.9967	65.7658	12.6126	7.20721	14.4144	63.1579
ALYU-77 Zeren transgenic line #119 in vitro virus-free		%A	%C	%G	%U	%A	%C	%G	%U	%A	%C	%G	%U		%A	%C	%G	%U	%A	%C	%G	%U	%A	%C	%G	%U		%A	%C	%G	%U	%A	%C	%G	%U	%A	%C	%G	%U		%A	%C	%G	%U	%A	%C	%G	%U	%A
	20-25 nt	43.1349	13.9333	13.1007	29.8312	42.7465	15.1505	12.8548	29.2482	43.5233	12.7161	13.3465	30.4142	20-25 nt													20-25 nt	24.0281	13.0394	6.80064	56.1319	21.9528	14.3467	12.7832	50.9174	26.1035	11.7321	0.818098	61.3464	20-25 nt	30.2294	12.4379	9.77353	47.5592	30.1341	12.7502	9.7575	47.3582	30.3247
	20 nt	32.6085	22.8106	19.6285	24.9524	33.597	22.9288	19.7024	23.7718	31.62	22.6925	19.5545	26.1331	20 nt													20 nt	27.6231	10.2623	3.77358	58.341	32.0755	13.2075	7.54717	47.1698	23.1707	7.31707	0	69.5122	20 nt	16.3958	6.87191	1.12094	75.6114	15.9449	7.48031	1.37795	75.1969	16.8467
	21 nt	8.72443	6.5283	4.40517	80.3421	8.97972	8.5676	5.20677	77.2459	8.46915	4.48901	3.60357	83.4383	21 nt													21 nt	25.4787	14.4116	0.577496	59.5321	19.9702	23.6587	1.15499	55.2161	30.9873	5.16455	0	63.8482	21 nt	22.3612	14.9448	0.564589	62.1294	22.3784	14.9483	0.525694	62.1475	22.344
	22 nt	79.3331	4.04101	5.18306	11.4428	80.9871	3.34473	5.16202	10.5061	77.6791	4.73729	5.20411	12.3795	22 nt													22 nt	22.6783	10.6459	1.52838	65.1474	34.7162	19.4323	3.05677	42.7948	10.6405	1.8595	0	87.5	22 nt	37.0536	3.87737	1.49877	57.5702	37.9017	3.85211	1.52923	56.717	36.2056
	23 nt	35.0317	22.9772	21.5457	20.4453	31.9671	26.9732	21.4002	19.6596	38.0964	18.9813	21.6912	21.2311	23 nt													23 nt	14.92	17.6227	2.37176	65.0855	16.3265	16.3265	2.04082	65.3061	13.5135	18.9189	2.7027	64.8649	23 nt	21.3484	16.959	10.4455	51.2471	20.7921	15.3465	10.8911	52.9703	21.9048
	24 nt	71.644	5.75843	7.86071	14.7368	71.1831	6.71135	7.64627	14.4593	72.105	4.8055	8.07516	15.0144	24 nt													24 nt	29.8575	7.23805	4.77482	58.1296	6.40625	2.34375	7.34375	83.9062	53.3088	12.1324	2.20588	32.3529	24 nt	39.0763	10.8142	23.3029	26.8067	38.9602	10.736	23.5314	26.7725	39.1924
	25 nt	31.4674	21.484	19.9809	27.0677	29.765	22.3772	18.0112	29.8466	33.1699	20.5908	21.9505	24.2888	25 nt													25 nt	23.6111	18.0556	27.7778	30.5556	22.2222	11.1111	55.5556	11.1111	25	25	0	50	25 nt	45.1411	21.1599	21.7085	11.9906	44.8276	24.1379	20.6897	10.3448	45.4545
ALYU-78 Dunyasha transgenic line #61 field virus-free		%A	%C	%G	%U	%A	%C	%G	%U	%A	%C	%G	%U		%A	%C	%G	%U	%A	%C	%G	%U	%A	%C	%G	%U		%A	%C	%G	%U	%A	%C	%G	%U	%A	%C	%G	%U		%A	%C	%G	%U	%A	%C	%G	%U	%A
	20-25 nt	39.1772	8.98201	17.2607	34.5801	39.9191	8.9715	16.3195	34.7899	38.4353	8.99251	18.2018	34.3704	20-25 nt													20-25 nt	23.2024	16.5911	4.47633	55.7302	20.5748	16.8731	6.74171	55.8104	25.8299	16.3092	2.21095	55.6499	20-25 nt	27.1087	11.3574	4.96229	56.5717	26.8495	11.0703	4.66641	57.4138	27.3678
	20 nt	32.1465	12.0439	38.9386	16.871	37.2595	10.1579	35.1596	17.423	27.0335	13.9299	42.7176	16.319	20 nt													20 nt	24.0865	10.3546	3.3867	62.1722	32.3232	11.8457	5.41781	50.4132	15.8498	8.8634	1.35558	73.9312	20 nt	13.6321	8.96192	1.54108	75.8649	13.5324	8.29646	1.49336	76.6777	13.7318
	21 nt	8.65661	5.13639	5.27964	80.9274	8.94545	4.58789	5.77909	80.6876	8.36777	5.68488	4.78018	81.1672	21 nt													21 nt	20.3647	16.943	0.52138	62.1709	7.87203	24.8665	1.01417	66.2473	32.8574	9.01958	0.0285882	58.0944	21 nt	14.2492	16.975	0.654039	68.1217	14.261	16.9593	0.661899	68.1178	14.2375
	22 nt	69.4423	2.84894	11.4893	16.2195	70.6392	2.44035	12.9118	14.0086	68.2454	3.25753	10.0667	18.4304	22 nt													22 nt	12.1645	14.7252	0.44377	72.6665	17.4273	24.0702	0.844567	57.658	6.90159	5.38032	0.0429738	87.6751	22 nt	16.9109	5.87865	1.03509	76.1754	16.8659	5.98761	1.02925	76.1173	16.9559
	23 nt	32.4888	16.1357	17.8889	33.4866	31.5947	17.9142	19.1019	31.3892	33.3829	14.3572	16.6759	35.584	23 nt													23 nt	16.924	18.7269	1.64518	62.7039	18.7261	8.9172	2.80255	69.5541	15.122	28.5366	0.487805	55.8537	23 nt	16.3785	15.1394	5.03938	63.4427	15.4752	14.1295	4.62574	65.7696	17.2819
	24 nt	70.8944	3.734	6.57557	18.796	70.7056	4.40042	6.18523	18.7088	71.0832	3.06757	6.96591	18.8833	24 nt													24 nt	30.1189	4.35268	4.1943	61.3341	12.1002	1.53893	5.37115	80.9897	48.1377	7.16643	3.01744	41.6785	24 nt	39.1205	7.65045	13.9797	39.2494	39.1442	7.41277	14.2791	39.1639	39.0968
	25 nt	21.4345	13.9932	23.392	41.1803	20.37	14.3283	18.7793	46.5224	22.499	13.658	28.0047	35.8382	25 nt													25 nt	35.5556	34.4444	16.6667	13.3333	35	30	25	10	36.1111	38.8889	8.33333	16.6667	25 nt	62.3607	13.5386	7.52444	16.5762	61.8182	13.6364	5.90909	18.6364	62.9032
ALYU-79 Kormilitsa transgenic line #103 field PVY		%A	%C	%G	%U	%A	%C	%G	%U	%A	%C	%G	%U		%A	%C	%G	%U	%A	%C	%G	%U	%A	%C	%G	%U		%A	%C	%G	%U	%A	%C	%G	%U	%A	%C	%G	%U		%A	%C	%G	%U	%A	%C	%G	%U	%A
	20-25 nt	44.1898	10.4751	11.8039	33.5312	43.8871	10.1925	12.4643	33.4561	44.4925	10.7576	11.1436	33.6062	20-25 nt	40.0451	14.8946	7.74618	37.3141	42.4836	17.1238	9.44925	30.9434	37.6066	12.6655	6.04311	43.6848	20-25 nt	23.9693	18.0476	6.03117	51.9519	23.3658	14.2804	10.8495	51.5043	24.5728	21.8149	1.21282	52.3995	20-25 nt	29.4378	12.5829	5.87641	52.1029	29.6519	12.4764	5.81992	52.0518	29.2237
	20 nt	30.3863	18.9577	18.8521	31.8039	32.1338	14.2104	20.3209	33.3349	28.6388	23.7051	17.3833	30.2728	20 nt	36.2154	22.9345	7.04808	33.8021	42.162	20.652	8.16277	29.0232	30.2687	25.2169	5.93339	38.581	20 nt	22.6113	10.9154	6.78844	59.6848	25.4513	13.3574	12.6354	48.556	19.7714	8.47344	0.941493	70.8137	20 nt	14.8158	8.88224	2.10099	74.2009	14.8062	8.8635	2.2701	74.0602	14.8254
	21 nt	9.42342	4.78086	7.17684	78.6189	8.38095	4.58208	11.302	75.735	10.4659	4.97965	3.05171	81.5027	21 nt	34.5787	19.0709	7.5382	38.8122	39.2825	22.7035	6.79974	31.2143	29.8749	15.4384	8.27665	46.4101	21 nt	25.8112	15.5272	3.81988	54.8417	21.3071	21.6536	7.38271	49.6566	30.3152	9.40086	0.25705	60.0269	21 nt	20.4382	16.0944	1.01347	62.4539	20.4123	16.1155	1.03076	62.4415	20.4641
	22 nt	77.3618	2.52358	5.09032	15.0244	79.093	1.98567	5.94496	12.9764	75.6305	3.06148	4.23568	17.0723	22 nt	36.1726	18.079	3.88954	41.8588	40.3653	20.3322	4.43295	34.8696	31.98	15.8259	3.34612	48.848	22 nt	19.2489	14.302	1.25561	65.1935	28.8411	22.5878	2.45703	46.1141	9.65673	6.01626	0.0542005	84.2728	22 nt	25.121	5.86127	1.35206	67.6657	25.1652	5.86386	1.36336	67.6076	25.0769
	23 nt	38.9391	17.9731	14.992	28.0958	36.8909	20.6128	15.76	26.7363	40.9873	15.3334	14.2239	29.4554	23 nt	38.8289	9.64435	6.85108	44.6757	39.1588	12.6174	11.2699	36.9539	38.499	6.6713	2.43224	52.3975	23 nt	20.2819	21.6232	1.44157	56.6534	28.279	7.88476	2.65353	61.1827	12.2847	35.3617	0.229621	52.124	23 nt	19.4708	17.9064	5.28563	57.3371	19.6343	17.5011	5.35481	57.5098	19.3074
	24 nt	75.9082	3.36571	6.59118	14.1349	75.5071	3.85536	6.4971	14.1404	76.3093	2.87606	6.68526	14.1294	24 nt	48.9374	7.39378	8.9821	34.6868	50.9656	9.51484	11.9642	27.5553	46.9091	5.27273	6	41.8182	24 nt	27.76	6.27676	4.88151	61.0817	8.11121	2.24993	6.63514	83.0037	47.4088	10.3036	3.12787	39.1598	24 nt	39.0882	10.0314	19.2467	31.6337	38.9647	10.1876	19.2883	31.5594	39.2117
	25 nt	33.1202	15.2495	18.1212	33.5091	31.317	15.9087	14.9606	37.8136	34.9233	14.5903	21.2818	29.2047	25 nt	45.5376	12.2453	12.1681	30.049	42.967	16.9231	14.0659	26.044	48.1081	7.56757	10.2703	34.0541	25 nt	28.1026	39.641	18	14.2564	28.2051	17.9487	33.3333	20.5128	28	61.3333	2.66667	8	25 nt	57.6925	16.7218	6.25958	19.3261	58.9286	16.3265	5.61224	19.1327	56.4565
[truncated: 3 more columns]

## Sheet: S1D pm RPM-total
sRNA library	Total number of 1-50 nt reads	Total number of 20-25 nt reads	Normalized No of 20-25 nt reads	zero mismatches
				S.tuberosum complete genome				PVY				PVS				PVS 25K hairpin RNA transgene
ALYU-75 Zeren non-transformed field PVS + PVY
					total	forward	reverse		total	forward	reverse		total	forward	reverse		total	forward	reverse
	35869294	29418323	1000000	20-25 nt	673359	345185	328174	20-25 nt	130403	68046.1	62357.2	20-25 nt	6617.47	4133	2484.47	20-25 nt	172.002	84.8451	87.1566
				20 nt	27694.5	14432.1	13262.4	20 nt	2283.98	1201.29	1082.69	20 nt	393.054	329.047	64.0077	20 nt	10.3677	5.26883	5.09886
				21 nt	307231	163894	143338	21 nt	116418	60509.7	55908.1	21 nt	4224.58	2305.26	1919.31	21 nt	121.761	59.0448	62.716
				22 nt	146426	70546.2	75879.6	22 nt	10771.9	5700.09	5071.84	22 nt	1177.4	770.132	407.263	22 nt	24.2026	12.8151	11.3875
				23 nt	23829.2	11921.4	11907.8	23 nt	432.554	275.339	157.215	23 nt	335.437	289.275	46.1617	23 nt	7.68229	3.73917	3.94312
				24 nt	152688	76191.5	76496	24 nt	363.413	244.541	118.871	24 nt	281.797	248.757	33.0406	24 nt	4.82692	2.51544	2.31148
				25 nt	15490	8199.82	7290.22	25 nt	133.59	115.098	18.4919	25 nt	205.212	190.528	14.6847	25 nt	3.1613	1.46167	1.69962
ALYU-76 Zeren transgenic line #119 field PVY					total	forward	reverse		total	forward	reverse		total	forward	reverse		total	forward	reverse
	35723314	29952043	1000000	20-25 nt	686645	352040	334605	20-25 nt	155190	71969.8	83220.6	20-25 nt	1618.69	992.186	626.502	20-25 nt	6066.46	3031.45	3035.02
				20 nt	23454.4	11774.6	11679.8	20 nt	2439.97	1280.15	1159.82	20 nt	49.0785	23.4375	25.641	20 nt	121.594	62.1994	59.3949
				21 nt	415769	221732	194037	21 nt	143759	65895.7	77863	21 nt	1362.91	851.528	511.384	21 nt	4838.97	2417.6	2421.37
				22 nt	137259	63476.9	73782	22 nt	7973.48	4004.3	3969.18	22 nt	111.812	61.0977	50.7144	22 nt	566.94	285.056	281.884
				23 nt	14092.4	7062.76	7029.64	23 nt	377.837	289.296	88.5415	23 nt	8.44684	3.33867	5.10817	23 nt	35.3231	16.8937	18.4295
				24 nt	89221.9	44526.9	44695	24 nt	444.01	326.055	117.955	24 nt	85.3698	52.1834	33.1864	24 nt	496.761	245.993	250.768
				25 nt	6848.65	3467.18	3381.47	25 nt	196.347	174.312	22.0352	25 nt	1.06837	0.600961	0.467414	25 nt	6.87766	3.70592	3.17174
ALYU-77 Zeren transgenic line #119 in vitro virus-free					total	forward	reverse		total	forward	reverse		total	forward	reverse		total	forward	reverse
	33830699	25122149	1000000	20-25 nt	793697	390574	403123	20-25 nt	87.4129	43.189	44.2239	20-25 nt	453.544	154.963	298.581	20-25 nt	3869.53	1935.5	1934.03
				20 nt	37620	19006.1	18613.9	20 nt	3.18444	1.91066	1.27378	20 nt	5.37374	2.10969	3.26405	20 nt	38.6512	20.2212	18.43
				21 nt	320017	145729	174287	21 nt	76.4266	37.0191	39.4075	21 nt	351.164	106.838	244.326	21 nt	3165.57	1582.55	1583.03
				22 nt	174108	94747	79360.8	22 nt	6.68733	3.26405	3.42327	22 nt	56.7627	18.2309	38.5317	22 nt	411.669	205.635	206.033
				23 nt	37894.4	19268.7	18625.7	23 nt	0.398055	0.35825	0.0398055	23 nt	3.42327	1.95047	1.4728	23 nt	16.3999	8.04071	8.35916
				24 nt	197717	98649.7	99067.7	24 nt	0.557277	0.477666	0.079611	24 nt	36.3026	25.4755	10.8271	24 nt	235.211	117.904	117.307
				25 nt	26341	13173.2	13167.8	25 nt	0.159222	0.159222	0	25 nt	0.517472	0.35825	0.159222	25 nt	2.03008	1.15436	0.875721
ALYU-78 Dunyasha transgenic line #61 field virus-free					total	forward	reverse		total	forward	reverse		total	forward	reverse		total	forward	reverse
	31627721	24088130	1000000	20-25 nt	718924	375759	343165	20-25 nt	86.225	42.2615	43.9636	20-25 nt	5331.96	2088.71	3243.26	20-25 nt	38879.8	19453.4	19426.3
				20 nt	39794.7	22185.8	17609	20 nt	2.3248	1.07937	1.24543	20 nt	85.0211	45.209	39.8121	20 nt	444.659	225.173	219.486
				21 nt	221600	112268	109331	21 nt	77.1749	37.0722	40.1027	21 nt	4230.76	1616.9	2613.86	21 nt	32041.1	16037.5	16003.6
				22 nt	160527	89577.9	70948.8	22 nt	6.06108	3.57022	2.49085	22 nt	738.621	255.603	483.018	22 nt	4921.01	2452.33	2468.68
				23 nt	35888.8	18944.7	16944.1	23 nt	0.207571	0.166057	0.0415142	23 nt	49.6095	32.5887	17.0208	23 nt	197.691	98.7208	98.9699
				24 nt	233117	117481	115636	24 nt	0.373628	0.2906	0.0830284	24 nt	225.63	137.578	88.0517	24 nt	1258.46	630.601	627.861
				25 nt	27997.7	15301.6	12696.2	25 nt	0.0830284	0.0830284	0	25 nt	2.3248	0.830284	1.49451	25 nt	16.8548	9.13313	7.72165
ALYU-79 Kormilitsa transgenic line #103 field PVY					total	forward	reverse		total	forward	reverse		total	forward	reverse		total	forward	reverse
	35229577	28946482	1000000	20-25 nt	694676	356321	338355	20-25 nt	36697.7	19110.5	17587.2	20-25 nt	6042.08	2379.15	3662.93	20-25 nt	42063.2	21037.8	21025.4
				20 nt	19187.7	10369.3	8818.41	20 nt	528.734	281.865	246.869	20 nt	89.6482	38.2775	51.3707	20 nt	480.335	238.924	241.411
				21 nt	272106	137372	134734	21 nt	32617.7	16929.4	15688.3	21 nt	4426.65	1725.29	2701.36	21 nt	32205.5	16107.6	16097.8
				22 nt	177162	94841.1	82320.9	22 nt	3267.75	1709.81	1557.94	22 nt	1092.46	327.605	764.86	22 nt	6901.32	3451.2	3450.13
				23 nt	21264.8	10961.1	10303.8	23 nt	134.317	84.6044	49.7124	23 nt	75.6569	45.5668	30.09	23 nt	318.312	158.707	159.605
				24 nt	193940	97067.9	96872.3	24 nt	111.343	73.3422	38.0012	24 nt	353.722	241.066	112.656	24 nt	2132.73	1067.83	1064.9
				25 nt	11015.3	5710.09	5305.24	25 nt	37.8284	31.4373	6.3911	25 nt	3.9383	1.34731	2.59099	25 nt	25.0462	13.5422	11.504
